# Supplementary material for: COVID-19 in Ethiopia: a geospatial analysis of vulnerability to infection, case severity and death
Source: PubMed Central journal article supplement — BMJ Open. 2021 Feb 18;11(2):e044606. doi: 10.1136/bmjopen-2020-044606 (PMC7896372; doi:10.1136/bmjopen-2020-044606), 2021-02-18
Supplement: bmjopen-2020-044606.draft_revisions.pdf [file bmjopen-2020-044606.draft_revisions.pdf]

# BMJ Open

BMJ Open is committed to open peer review. As part of this commitment we make the peer review history of every article we publish publicly available.

When an article is published we post the peer reviewers' comments and the authors' responses online. We also post the versions of the paper that were used during peer review. These are the versions that the peer review comments apply to.

The versions of the paper that follow are the versions that were submitted during the peer review process. They are not the versions of record or the final published versions. They should not be cited or distributed as the published version of this manuscript.

BMJ Open is an open access journal and the full, final, typeset and author-corrected version of record of the manuscript is available on our site with no access controls, subscription charges or pay-per-view fees (<http://bmjopen.bmj.com>).

If you have any questions on BMJ Open's open peer review process please email [info.bmjopen@bmj.com](mailto:info.bmjopen@bmj.com)

# BMJ Open

## COVID-19 in Ethiopia: A geospatial analysis of vulnerability to infection, case severity, and likelihood of death

|                               |                                                                                                                                                                                                                                                                                                                                                                                                                                                                                                                                                                                                                                                                                                                                                                                                                                                                                                                                                                                                                                                                                                                                                                                                                                                                                                                                                                                                                                                                                                                                                                                                                                                                                                                                                                                                                                                                                                                                                                                                                                                                                                                                                                                                                                                                                                                   |
|-------------------------------|-------------------------------------------------------------------------------------------------------------------------------------------------------------------------------------------------------------------------------------------------------------------------------------------------------------------------------------------------------------------------------------------------------------------------------------------------------------------------------------------------------------------------------------------------------------------------------------------------------------------------------------------------------------------------------------------------------------------------------------------------------------------------------------------------------------------------------------------------------------------------------------------------------------------------------------------------------------------------------------------------------------------------------------------------------------------------------------------------------------------------------------------------------------------------------------------------------------------------------------------------------------------------------------------------------------------------------------------------------------------------------------------------------------------------------------------------------------------------------------------------------------------------------------------------------------------------------------------------------------------------------------------------------------------------------------------------------------------------------------------------------------------------------------------------------------------------------------------------------------------------------------------------------------------------------------------------------------------------------------------------------------------------------------------------------------------------------------------------------------------------------------------------------------------------------------------------------------------------------------------------------------------------------------------------------------------|
| Journal:                      | <i>BMJ Open</i>                                                                                                                                                                                                                                                                                                                                                                                                                                                                                                                                                                                                                                                                                                                                                                                                                                                                                                                                                                                                                                                                                                                                                                                                                                                                                                                                                                                                                                                                                                                                                                                                                                                                                                                                                                                                                                                                                                                                                                                                                                                                                                                                                                                                                                                                                                   |
| Manuscript ID                 | bmjopen-2020-044606                                                                                                                                                                                                                                                                                                                                                                                                                                                                                                                                                                                                                                                                                                                                                                                                                                                                                                                                                                                                                                                                                                                                                                                                                                                                                                                                                                                                                                                                                                                                                                                                                                                                                                                                                                                                                                                                                                                                                                                                                                                                                                                                                                                                                                                                                               |
| Article Type:                 | Original research                                                                                                                                                                                                                                                                                                                                                                                                                                                                                                                                                                                                                                                                                                                                                                                                                                                                                                                                                                                                                                                                                                                                                                                                                                                                                                                                                                                                                                                                                                                                                                                                                                                                                                                                                                                                                                                                                                                                                                                                                                                                                                                                                                                                                                                                                                 |
| Date Submitted by the Author: | 09-Sep-2020                                                                                                                                                                                                                                                                                                                                                                                                                                                                                                                                                                                                                                                                                                                                                                                                                                                                                                                                                                                                                                                                                                                                                                                                                                                                                                                                                                                                                                                                                                                                                                                                                                                                                                                                                                                                                                                                                                                                                                                                                                                                                                                                                                                                                                                                                                       |
| Complete List of Authors:     | <p>Alene, Kefyalew; Curtin University, Faculty of Health Sciences; Telethon Kids Institute, Wesfarmers Centre of Vaccines and Infectious Diseases<br/> Assefa, Yalemzewod; University of Gondar; University of New South Wales, School of Women's and Children's Health<br/> Fetene, Dagnachew ; Burnet Institute<br/> Koye, Digsu ; The University of Melbourne School of Population and Global Health<br/> Melaku, Yohannes Adama; Flinders University, Public Health; The University of Adelaide Adelaide Medical School<br/> Gesesew, Hailay; Mekelle University, Epidemiology Department, School of Health Sciences; Flinders University<br/> Birhanu, Mulugeta ; St Paul's Hospital Millennium Medical College<br/> Adane, Akilew; Telethon Kids Institute<br/> Muluneh, Muluken; Western Sydney University; Amref Health Africa in Ethiopia, Monitoring Evaluation and Research<br/> Dachew, Berihun; University of Gondar, Institute of Public Health; Curtin University, School of Public Health<br/> Abrha, Solomon; University of Canberra; Mekelle University, School of Pharmacy<br/> Aregay, Atsede; Monash University; Mekelle University, School of Nursing<br/> Ayele, Asnakew ; University of Gondar, School of Pharmacy; University of New England<br/> Bezabhe, Woldesellassie; University of Tasmania Faculty of Health<br/> Tadesse, Kidane ; Queensland University of Technology; Mekelle University, School of Public Health<br/> Gebremedhin, Tesfaye; University of Canberra<br/> Tesfay, Amanuel; Telethon Kids Institute, Wesfarmers Centre of Vaccines and Infectious Diseases; Curtin University, School of Public health<br/> Gebremichael, Lemlem; Mekelle University, Pharmacology Department; University of South Australia, School of Pharmacy and Medical Sciences, Therapeutics Research Centre<br/> Geleto, Ayele; Haramaya University; The University of Newcastle Faculty of Health and Medicine<br/> Kassahun, Habtamu ; Griffith University, Australian Rivers Institute<br/> Kibret, Getiye ; Debre Markos University, Public Health; The University of Sydney<br/> Leshargie, Cheru; Debre Markos University College of Health Science; University of Technology Sydney<br/> Mekonnen, Alemayehu; Deakin University; The University of Sydney, School of Pharmacy</p> |

1  
2  
3  
4  
5  
6  
7  
8  
9  
10  
11  
12  
13  
14  
15  
16  
17  
18  
19  
20  
21  
22  
23  
24  
25  
26  
27  
28  
29  
30  
31  
32  
33  
34  
35  
36  
37  
38  
39  
40  
41  
42  
43  
44  
45  
46  
47  
48  
49  
50  
51  
52  
53  
54  
55  
56  
57  
58  
59  
60

|                  |                                                                                                                                                                                                                                                                                                                                                                                                                                                                                                                                                                                                                                                                                                                                                                                                                                                          |
|------------------|----------------------------------------------------------------------------------------------------------------------------------------------------------------------------------------------------------------------------------------------------------------------------------------------------------------------------------------------------------------------------------------------------------------------------------------------------------------------------------------------------------------------------------------------------------------------------------------------------------------------------------------------------------------------------------------------------------------------------------------------------------------------------------------------------------------------------------------------------------|
|                  | <p>Mirkuzie, Alemnesh; Ethiopian Public Health Institute; University of Washington, Institute for Health Metrics and Evaluation<br/>         Mohammed, Hassen; The University of Adelaide; Women's and Children's Health Network<br/>         Tegegn, Henok; University of New England; University of Gondar<br/>         Gebresilassie, A; Mekelle University, Epidemiology; University of New South Wales, The George Institute for Global Health<br/>         Tesfay, Fisaha; Flinders University Faculty of Medicine Nursing and Health Sciences, South gate institute for Health, Society and Equity ;<br/>         Mekelle University College of Health Sciences, School of Public Health<br/>         Wubishet, Befikadu ; University of Canberra<br/>         Kinfu, Yohannes; University of Canberra; Qatar University, College of Medicine</p> |
| <p>Keywords:</p> | <p>Epidemiology &lt; TROPICAL MEDICINE, PUBLIC HEALTH, Public health &lt; INFECTIOUS DISEASES</p>                                                                                                                                                                                                                                                                                                                                                                                                                                                                                                                                                                                                                                                                                                                                                        |
|                  |                                                                                                                                                                                                                                                                                                                                                                                                                                                                                                                                                                                                                                                                                                                                                                                                                                                          |

SCHOLARONE™  
Manuscripts

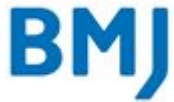

I, the Submitting Author has the right to grant and does grant on behalf of all authors of the Work (as defined in the below author licence), an exclusive licence and/or a non-exclusive licence for contributions from authors who are: i) UK Crown employees; ii) where BMJ has agreed a CC-BY licence shall apply, and/or iii) in accordance with the terms applicable for US Federal Government officers or employees acting as part of their official duties; on a worldwide, perpetual, irrevocable, royalty-free basis to BMJ Publishing Group Ltd ("BMJ") its licensees and where the relevant Journal is co-owned by BMJ to the co-owners of the Journal, to publish the Work in this journal and any other BMJ products and to exploit all rights, as set out in our [licence](#).

The Submitting Author accepts and understands that any supply made under these terms is made by BMJ to the Submitting Author unless you are acting as an employee on behalf of your employer or a postgraduate student of an affiliated institution which is paying any applicable article publishing charge ("APC") for Open Access articles. Where the Submitting Author wishes to make the Work available on an Open Access basis (and intends to pay the relevant APC), the terms of reuse of such Open Access shall be governed by a Creative Commons licence – details of these licences and which [Creative Commons](#) licence will apply to this Work are set out in our licence referred to above.

Other than as permitted in any relevant BMJ Author's Self Archiving Policies, I confirm this Work has not been accepted for publication elsewhere, is not being considered for publication elsewhere and does not duplicate material already published. I confirm all authors consent to publication of this Work and authorise the granting of this licence.

## 1 COVID-19 in Ethiopia: A geospatial analysis of vulnerability to infection, 2 case severity, and likelihood of death

3 Kefyalew Addis Alene<sup>1,2,3\*</sup>, Yalemzewod Assefa Gelaw<sup>3,4+</sup>, Dagnachew Muluye Fetene<sup>5</sup>, Digsu N  
4 Koye<sup>6</sup>, Yohannes Adama Melaku<sup>7,8</sup>, Hailay Abrha Gesesew<sup>9,10</sup>, Mulugeta Molla Birhanu<sup>11</sup>, Akilew  
5 Awoke Adane<sup>12</sup>, Muluken Dessalegn Muluneh<sup>13,14</sup>, Berihun Assefa Dachew<sup>3,15</sup>, Solomon Abrha<sup>16,17</sup>,  
6 Atsede Aregay<sup>18,19</sup>, Asnakew Achaw Ayele<sup>20,21</sup>, Woldesellassie M Bezabhe<sup>22</sup>, Kidane Tadesse  
7 Gebremariam<sup>23,24</sup>, Tesfaye Gebremedhih<sup>25</sup>, Amanuel Tesfay<sup>15,2</sup>, Lemlem Gebremedhin  
8 Gebremichael<sup>26,27</sup>, Ayele Geleto<sup>28,29</sup>, Habtamu Tilahun Kassahun<sup>30</sup>, Getiye Dejenu Kibret<sup>31,32</sup>, Cheru  
9 Tesema Leshargie<sup>33,34</sup>, Alemayehu Mekonnen<sup>35,36</sup>, Alemnesh H. Mirkuzie<sup>37,38,39</sup>, Hassen  
10 Mohammed<sup>40,41</sup>, Henok Getachew Tegegn<sup>21,42</sup>, Azeb Gebresilassie Tesema<sup>22,43</sup>, Fisaha Tesfay<sup>9,10,44</sup>,  
11 Befikadu L. Wubishet<sup>45</sup>, Yohannes Kinfu<sup>38,46,47,48+</sup>

13 <sup>1</sup>Faculty of Health Sciences, Curtin University, Western Australia, Australia

14 <sup>2</sup>Wesfarmers Centre of Vaccines and Infectious Diseases, Telethon Kids Institute, Perth, Western  
15 Australia, Australia

16 <sup>3</sup>Institute of Public Health, University of Gondar, Gondar, Ethiopia

17 <sup>4</sup>Population Child Health Research Group, School of Women's and Children's Health, University of  
18 New South Wales, Australia

19 <sup>5</sup>Burnet Institute, Melbourne, Victoria, Australia

20 <sup>6</sup>Centre for Epidemiology and Biostatistics, Melbourne School of Population and Global Health,  
21 University of Melbourne, Australia

22 <sup>7</sup>Adelaide Institute for Sleep Health, College of Medicine and Public health, Flinders University,  
23 Australia

24 <sup>8</sup>Adelaide Medical School, University of Adelaide, Australia

25 <sup>9</sup>College of Medicine and Public Health, Flinders University, Australia

26 <sup>10</sup>Epidemiology Department, School of Health Sciences, Mekelle University, Ethiopia

27 <sup>11</sup>Department of nursing, St. Paul's Hospital Millennium Medical College, Addis Ababa, Ethiopia

28 <sup>12</sup>Telethon Kids Institute, The University of Western Australia, Nedlands, Western  
29 Australia, Australia

30 <sup>13</sup>Amref Health Africa in Ethiopian, Monitoring Evaluation and Research, Addis Ababa, Ethiopia

31 <sup>14</sup>School of Nursing and Midwifery, Western Sydney University, Sydney Australia

32 <sup>15</sup>School of Public health, Curtin University, Western Australia, Australia

33 <sup>16</sup>Faculty of Health, University of Canberra, Bruce, Canberra, Australian Capital Territory, Australia.

34 <sup>17</sup>Department of Pharmaceutics, School of Pharmacy, College of Health Sciences, Mekelle University,  
35 Mekelle, Ethiopia

36 <sup>18</sup>School of Nursing and Midwifery, Monash University, Melbourne, Australia

37 <sup>19</sup>School of Nursing, Mekelle University, Ethiopia

38 <sup>20</sup>School of Health, Faculty of Medicine and Health, University of New England, Armidale 2351,  
39 Australia

40 <sup>21</sup>Department of Clinical Pharmacy, School of Pharmacy, College of Medicine and Health Science,  
41 University of Gondar, Gondar, Ethiopia

42 <sup>22</sup>School of pharmacy and pharmacology, University of Tasmania

43 <sup>23</sup>School of Exercise and Nutrition Sciences, Queensland University of Technology, Australia

44 <sup>24</sup>School of Public Health, Mekelle University, Ethiopia

45 <sup>25</sup>Faculty of Business, Government and Law, University of Canberra

46 <sup>26</sup>School of Pharmacy and Medical Sciences, Therapeutics Research Centre, University of South  
47 Australia, Adelaide, Australia

48 <sup>27</sup>School of Pharmacy, Pharmacology Department, Mekelle University, Mekelle, Ethiopia

49 <sup>28</sup>School of Public Health, College of Health and Medical Sciences, Haramaya University, Ethiopia

- 1  
2  
3 50 <sup>29</sup>School of Medicine and Public Health, Faculty of Health and Medicine, the University of  
4 51 Newcastle, Australia  
5 52 <sup>30</sup>Australian Rivers Institute, Griffith University, Nathan, Australia  
6  
7 53 <sup>31</sup>Debre Markos University, Ethiopia  
8 54 <sup>32</sup>University of Sydney, Australia  
9 55 <sup>33</sup>School of Public Health, Faculty of Health, University of Technology Sydney, Ultimo, Australia  
10 56 <sup>34</sup>College of Health Sciences, Debre Markos University, Debre Markos, Ethiopia  
11 57 <sup>35</sup>Institute for Health Transformation, Deakin University, Australia,  
12 58 <sup>36</sup>School of Pharmacy, University of Sydney, Sydney, Australia  
13 59 <sup>37</sup>Ethiopian Public Health Institute, Addis Ababa, Ethiopia  
14 60 <sup>38</sup>Institute for Health Metrics and Evaluation, University of Washington, Seattle, USA  
15 61 <sup>49</sup>Center for International Health, University of Bergen, Bergen, Norway  
16 62 <sup>40</sup>Vaccinology and Immunology Research Trials Unit, Women's and Children's Health Network,  
17 63 Adelaide, South Australia, Australia  
18 64 <sup>41</sup>Robinson Research Institute, University of Adelaide, Adelaide, South Australia, Australia  
19 65 <sup>42</sup>School of Rural Medicine, University of New England, Armidale, Australia  
20 66 <sup>43</sup>The George Institute for Global Health, University of New South Wales, Australia, Sydney  
21 67 <sup>44</sup>School of Health and Social Development, Deakin University  
22 68 <sup>45</sup>Research Centre for Generational Health and Ageing, University of Newcastle, Australia  
23 69 <sup>46</sup>Faculty of Health, University of Canberra, Australia  
24 70 <sup>47</sup>College of Medicine, Qatar University, Qatar  
25 71 <sup>48</sup>Murdoch Children's Research Institute, Royal Children's Hospital, Melbourne, Australia  
26  
27  
28  
29

30 73 **\*Corresponding Author:** Kefyalew Addis Alene, Faculty of Health Sciences, Curtin  
31 74 University, Western Australia, Australia, Kent St, Bentley WA 6102, Australia. Tel:  
32 75 +61404705064; E-mail: kefyalew.alene@anu.edu.au  
33

34 76

35  
36  
37 77 <sup>+</sup>Equal contributor  
38 78  
39  
40 79  
41  
42 80  
43  
44 81  
45  
46  
47 82  
48  
49 83  
50  
51 84  
52  
53

54 85 **Keywords:** Risk map, vulnerability, infection, severity, death, COVID-19, Ethiopia, geospatial  
55  
56  
57 86  
58  
59 87  
60

1  
2  
3 **88 Abstract**  
4  
5

6 **89 Background:** COVID-19 has caused a global public health crisis affecting most countries,  
7 including Ethiopia, in various ways. This study maps the vulnerability to infection, case  
8 severity, and likelihood of death from COVID-19 in Ethiopia.  
9

10 **92 Methods:** Thirty-eight potential indicators of vulnerability to COVID-19 infection, case  
11 severity and likelihood of death, identified based on a literature review and the availability of  
12 nationally representative data at a low geographic scale, were assembled from multiple sources  
13 for geospatial analysis. Geospatial analysis techniques were applied to produce maps showing  
14 the vulnerability to infection, case severity, and likelihood of death in Ethiopia at a high level  
15 of resolution (1 km X 1 km).  
16  
17  
18  
19  
20  
21  
22  
23

24 **98 Results:** This study showed that vulnerability to COVID-19 infection is likely to be high  
25 across most parts of Ethiopia, particularly in the Somali, Afar, Amhara, Oromia, and Tigray  
26 regions. The number of severe cases of COVID-19 infection requiring hospitalisation and  
27 intensive care unit admission is likely to be high across Amhara, most parts of Oromia and  
28 some parts of the Southern Nations, Nationalities, and Peoples' Region. The risk of COVID-  
29 19-related death is high in the country's border regions, where public health preparedness for  
30 responding to COVID-19 is limited.  
31  
32  
33  
34  
35  
36  
37

38 **105 Conclusion:** This study revealed geographical differences in vulnerability to infection, case  
39 severity, and likelihood of death from COVID-19 in Ethiopia. The study offers high-resolution  
40 maps that can guide the targeted interventions necessary to contain the spread of COVID-19 in  
41 Ethiopia.  
42  
43  
44  
45  
46  
47  
48  
49  
50  
51  
52  
53  
54  
55  
56  
57  
58  
59  
60

### Strengths and limitations of this study

- This is the first study that maps vulnerability to COVID-19 infection, severe cases, and associated death in Ethiopia at a high level of resolution across the entire territory of Ethiopia.
- This is also the first study that has attempted to present the degree of service preparedness for COVID-19 across the country.
- The study incorporated a wide range of indicators from multiple sources and applied rigorous geospatial techniques to provide the best possible prediction maps.
- However, some important indicators such as psychosocial and clinical factors were not captured in our modelling due to the lack of geocoded data.

115

116

117

118

119

120

121

122

123

124

125

126

127



## 128 **Introduction**

129 Coronavirus disease (COVID-19) has become one of the most serious global public health  
130 crises in modern times <sup>1</sup>. The disease was declared a pandemic on 11 March 2020 and has  
131 currently affected more than 216 countries and territories <sup>2</sup>. As of 3 August 2020, there were  
132 more than 17.6 million confirmed COVID-19 cases and over 680,000 associated deaths around  
133 the globe <sup>3</sup>. The highest numbers of cases and deaths have been reported from the USA, Brazil,  
134 India, and some European countries, such as Russia, the United Kingdom, Italy, and Spain <sup>3</sup>.  
135 African countries, including Ethiopia, have reported a low number of COVID-19, although the  
136 number of cases and deaths are currently on the rise <sup>4</sup>. In Ethiopia, the first case of COVID-19  
137 was reported on 13 March 2020, and the disease recently spread rapidly from the capital city,  
138 Addis Ababa, to other parts of the country, affecting almost all regions at various levels <sup>5</sup>.

139 COVID-19 has had severe health and economic consequences <sup>6</sup>. Multiple factors, such as  
140 socio-demographic, connectivity, behavioural, climatic, and comorbidity factors, are strong  
141 predictors of the differences in transmission, hospitalisation, and mortality rates among and  
142 within countries <sup>7,8</sup>. Studies conducted in Africa have provided limited information on the  
143 vulnerability of different areas to COVID-19 infection <sup>4,9</sup>. These studies have been conducted  
144 at the country level using a limited number of indicators <sup>4,9</sup>. Mapping the risks of COVID-19  
145 (infection, case severity, service preparedness and death) at a higher resolution (using the  
146 lowest administrative unit, such as the district) is important in many ways. First, the generated  
147 evidence can help the government and community better prepare and respond to the health-  
148 and non-health-related impacts of COVID-19 according to their contextual circumstances.  
149 Second, it can help the relevant bodies determine effective and efficient resource-mobilisation  
150 efforts, such as providing training for health care workers, supplying hospitals with necessary  
151 equipment, prioritising testing practices, and distributing hand sanitizer and protective  
152 facemasks. Third, the information can be utilised as a guide for designing targeted travel  
153 restrictions or applying full or partial lockdowns as needed. Fourth, the evidence can stimulate  
154 further study on COVID-19 in the country.

155 Given Ethiopia's large population size, variation in resources and vast geographic size, the risk  
156 of COVID-19 infection, case severity and likelihood of death are likely to differ across regions,  
157 zones, and districts, suggesting that local and context-specific interventions be implemented.  
158 Therefore, this study aimed to map the vulnerability to infection, case severity, and likelihood

159 of death from COVID-19 in Ethiopia at a higher geographic resolution (1 km X 1 km) over the  
160 whole territory of Ethiopia using rigorous state-of-the-art geospatial techniques.

## 161 **Methods**

### 162 **Study area**

163 This study focused on Ethiopia, the second-most populous country in Africa, with an estimated  
164 population size of more than 115 million <sup>10</sup>. Ethiopia has a total area of approximately 1.1  
165 million square kilometres, making it the 10<sup>th</sup> largest country in Africa and the 27<sup>th</sup> largest in  
166 the world. The country has a tiered administrative system consisting of regional states (first  
167 level), zones (second level), woredas or districts (third level), and kebeles or neighbourhoods  
168 (fourth level) <sup>11</sup>. There are nine administrative regional states in Ethiopia, including Tigray,  
169 Afar, Amhara, Oromia, Somali, Benishangul-Gumuz, Harari, Gambella, and the Southern  
170 Nations, Nationalities, and Peoples' Region (SNNPR), and two administrative cities (Addis  
171 Ababa and Direedawa). The four regional states (Afar, Somali, Benishangul-Gumuz, and  
172 Gambella) are categorised as developing regional states. The administrative units of Ethiopia  
173 (shapefiles) were obtained from the Database for Global Administrative Areas <sup>12</sup>.

### 174 **Data sources and variable selection**

175 The analysis data were assembled from multiple sources (Table 1). Potential indicators were  
176 selected based on evidence of association with COVID-19 infection, case severity, and death  
177 based on a literature review and the availability of country-wide representative data at a  
178 district geographic scale or lower (Figure 1). Table 2 presents the evidence for the association  
179 between indicators and COVID-19, as well as the rationale for selecting these indicators for  
180 the study.

181 The following area-level demographic and socio-economic indicators were used as indicators  
182 of COVID-19 infection and case severity: the average number of persons per household, the  
183 proportion of the population aged  $\geq 65$  years, the proportion of males, and the number of  
184 households in the lowest wealth quintile. All of these socio-economic and demographic  
185 indicators were obtained from the latest Ethiopia Demographic and Health Survey (EDHS) <sup>13</sup>.  
186 Population density, estimated as the number of people per grid, was obtained from WorldPop  
187 <sup>14</sup>.

188 Connectivity indicators, which measure the population-level vulnerability to infection, were  
189 also captured using distance and time-bounded markers. Specifically, average travel time  
190 (measured in minutes) to the nearest city with at least 50,000 people and proximity to

1  
2  
3 191 international borders (measured in kilometres) were included to measure each area's level of  
4 192 susceptibility to infection. Data on travel time to the nearest city, obtained from the University  
5 193 of Oxford's Malaria Atlas Project (MAP), were used to quantify the accessibility of an area to  
6 194 high-density urban centres at a resolution of 1 km×1 km.<sup>15</sup> Data on proximity to international  
7 195 borders were obtained from the EDHS spatial data repository and were used to measure<sup>16</sup> the  
8 196 geodesic distance to the nearest international border in kilometres, indicating the risk of cross-  
9 197 border transmission and the spread of COVID-19. Infection rates and the spread of COVID-19  
10 198 were also positively correlated with the per capita public transportation use rate<sup>17</sup>. Thus, to  
11 199 determine the nearest cross-country road to each location on the map, we obtained and applied  
12 200 data for major roads from the World Bank<sup>18</sup>.

21 201 It is evident that inadequate knowledge about COVID-19 and a lack of awareness of prevention  
22 202 measures exacerbate the community transmission of the disease<sup>19</sup>. Therefore, we extracted  
23 203 data on the adult literacy rate, access to media (such as radio, television, and mobile phone  
24 204 messages) and knowledge about other infectious diseases (e.g., HIV) from the EDHS as proxies  
25 205 for knowledge of COVID-19 prevention measures in each area of the country<sup>13</sup>. According to  
26 206 the WHO, maintaining good hand hygiene through regular washing with soap and water is one  
27 207 of the most effective preventative measures for reducing the transmission of COVID-19<sup>20,21</sup>.  
28 208 Using the same data as above, we also assessed hand hygiene practices, access to water, and  
29 209 the availability of handwashing stations in a household.

37 210 Previous studies have shown that underlying chronic comorbidities and behavioural factors  
38 211 such as cigarette, alcohol and khat consumption were associated with more severe COVID-19  
39 212 infections<sup>22,23</sup>. Data on khat chewing and the alcohol consumption rate were obtained from the  
40 213 EDHS 2016<sup>13</sup>, and data on cigarette smoking were obtained from the Ethiopia Public Health  
41 214 Institute STEP wise approach to Surveillance (STEPS) study<sup>24</sup>. The STEP survey was also  
42 215 used to measure the prevalence of select non-communicable diseases (NCDs) such as  
43 216 hypertension, heart disease, and diabetes mellitus (DM).

50 217 The level of preparedness and readiness of health facilities to detect, manage, and control the  
51 218 COVID-19 pandemic at a given location was measured using data from the Service Availability  
52 219 and Readiness Assessment (SARA) survey<sup>25</sup>. For each geo-location, the obtained measures  
53 220 include the availability and readiness of facilities in terms of basic amenities and equipment,  
54 221 standard precautions, diagnostic capacities, and essential medicines. In addition, data on  
55 222 service readiness for specific diseases such as DM, chronic respiratory disease (CRD), and

1  
2  
3 223 tuberculosis (TB), as well as the availability of intensive care units (ICUs) and laboratory  
4 224 facilities, were obtained from this same survey. To augment the health facility data, we  
5 225 extracted population-level indicators on health care access and barriers to care from EDHS  
6  
7 226 2016<sup>13</sup>.

8  
9  
10 227 Finally, climatic data (temperature, precipitation, humidity, and sunlight exposure) were  
11 228 obtained from the WorldClim v2.0 Global Climate Database<sup>26</sup>. These data were extracted at a  
12 229 spatial resolution of 30 seconds or ~1 km<sup>2</sup> and were considered indicators of COVID-19  
13 230 infection in this study.

### 18 231 **Geospatial data processing**

19  
20 232 All data were georeferenced using a geographical information system, ArcGIS 10.6.1 software  
21 233 (ESRI Inc., Redlands CA, USA). A very small rectangular polygon (fishnet) with its centroid  
22 234 (fishnet centroid) covering the whole territory of Ethiopia was created using tools in ArcGIS  
23 235 (Figure 2). The fishnet centroid contained a unique identification number and was used as a  
24 236 common georeferenced system to process, join, and extract the raster and vector data collected  
25 237 from various sources. All vector data (point, polygon, and line) were converted to raster data  
26 238 using geostatistical methods<sup>27</sup>. Raster grids were then resampled to the common georeferenced  
27 239 system at a spatial resolution of 1 km x 1 km. Finally, a raster mask covering the entire country  
28 240 was created by clipping smaller spatial units from a large global raster data source.

### 35 241 **Statistical analyses**

36  
37 242 Geostatistical techniques such as spatial autocorrelation, kriging and semivariograms were  
38 243 applied to create a prediction grid surface from a scattered set of points<sup>28</sup>. Kriging assumes  
39 244 that the distance or direction between sample points reflects a spatial correlation that can be  
40 245 used to explain variation in the surface<sup>29</sup>. Since the variables had different units of  
41 246 measurement, the datasets were normalised using a min-max approach to a standard scale  
42 247 ranging from 0 (the lowest risk) to 100 (the highest risk)<sup>30</sup>. After normalisation, the indicators  
43 248 were averaged to create a vulnerability index, measuring the risk of COVID-19 for each geo-  
44 249 location<sup>31</sup>. The vulnerability indices were calculated separately for each domain, namely, the  
45 250 vulnerability to infection, case severity, and likelihood death from COVID-19. The three  
46 251 domains were then averaged to produce the overall COVID-19 vulnerability index. Given that  
47 252 COVID-19 is a new virus, there is a lack of evidence for assigning weights for each indicator.  
48 253 Hence, equal weight was given to all indicators when calculating the arithmetic mean for the  
49 254 aggregate vulnerability indices. We also used principal component analysis (PCA) and  
50 255 geometric means as alternative aggregation methods, producing broadly similar results

1  
2  
3 256 (Supplemental Figure 1 and Supplemental Figure 2). The risk maps were then created  
4  
5 257 separately for infection, case severity, service preparedness, and death from the composite  
6  
7 258 index using geostatistical tools in ArcGIS. All data transformations and aggregations were  
8  
9 259 performed in R <sup>32</sup>.

10  
11 260 **Ethics aspects:** Ethical approval was not required for this study as it was based on publicly  
12  
13 261 available data.

14  
15 262 **Patient and public involvement:** This research was done without patient and public  
16  
17 263 involvement.

18  
19  
20 264 **Funding:** There was no funding source for this study.  
21  
22

## 23 265 **Results**

### 24 266 **Vulnerability to COVID-19 infection**

25  
26  
27 267 Figure 3 shows the vulnerability map of COVID-19 infection in Ethiopia. The map highlights  
28  
29 268 that most parts of the country are likely to have a relatively high vulnerability and be at  
30  
31 269 substantial risk for COVID-19 infection. Most parts of the country are identified as vulnerable  
32  
33 270 to COVID-19 infection, with the exception of Addis Ababa and the north-western Somali  
34  
35 271 region. The peripheral areas of the country bordering Djibouti, Somalia, Eritrea, and South  
36  
37 272 Sudan appeared to be vulnerable to COVID-19 infection. These outlying areas are  
38  
39 273 characterised by a low level of geographical connectivity and low scores for disease  
40  
41 274 knowledge, hand hygiene and socio-economic indices (Supplemental Figure 3). They also have  
42  
43 275 certain climatic factors that were found to be important indicators of COVID-19 transmission.

### 44 276 **Vulnerability to severe cases of COVID-19 infection**

45  
46 277 Areas across the Amhara region and most parts of the Oromia region are likely to experience  
47  
48 278 severe forms of COVID-19 that require hospitalisation and ICU admission. Some parts of the  
49  
50 279 SNNPR are also expected to be at high risk of severe COVID-19 infections. The combination  
51  
52 280 of demographic (high proportion of older adults), comorbidity (high prevalence of  
53  
54 281 hypertension, DM, obesity, HIV, and TB), and behavioural and economic indicators (high  
55  
56 282 proportion of smokers and high level of alcohol and khat consumption, interior cooking, and  
57  
58 283 solid fuel use) renders these parts of the country at a higher risk of severe forms of COVID-19.  
59  
60 284 Figure 4 shows the levels of vulnerability to severe forms of COVID-19.

### 285 **Vulnerability to death from COVID-19**

1  
2  
3 286 People living around border areas in Ethiopia are at a high risk for COVID-19-related death,  
4 as illustrated in Figure 5. Districts and zones in the Benishangul-Gumuz, Gambela, Afar,  
5 287 SNNPR, Dire Dawa, Southwest Somali, Northwest Amhara, Western Tigray, and Western and  
6 288 Eastern Oromia regions are at high risk for COVID-19-related death. The level of service  
7 289 preparedness and readiness to mitigate the health effects of COVID-19 appear to be very low  
8 290 in these regions (Figure 6). Ethiopia's border regions have inadequate ICU availability and  
9 291 laboratory capacity as well as limited health care access. They also have low general and  
10 292 laboratory capacity as well as limited health care access. They also have low general and  
11 293 service-specific readiness, as shown in Figure 6.

## 18 294 **Discussion**

20 295 This is the first study that maps vulnerability to COVID-19 infection, severe infection cases,  
21 296 and associated death in Ethiopia at a high resolution. This is also the first study that has  
22 297 attempted to present the degree of service preparedness for COVID-19 across the country.

23 298 We found that most parts of the country are vulnerable to COVID-19 infections, and the  
24 299 greatest burden might be outside of Addis Ababa. It is likely that compared to other regions, a  
25 300 higher proportion of people from the Amhara and Oromia regions, the two most populous  
26 301 regions of the country, will develop severe forms of COVID-19 leading to hospitalisation and  
27 302 ICU admission. Border areas of the country are also expected to face a higher risk of death than  
28 303 areas located in the central regions. The findings of this study are of paramount importance in  
29 304 preventing and controlling COVID-19 transmission and in designing targeted interventions,  
30 305 such as enacting travel restrictions, distributing preventative masks and determining which  
31 306 areas to prioritise if a COVID-19 vaccine becomes available. As some of these areas also have  
32 307 lower preparedness scores and low general and service-specific readiness scores, the findings  
33 308 have wider implications for allocating resources and strengthening the health care system after  
34 309 the COVID-19 pandemic.

35 310 Despite the proportionally high infection rate in Addis Ababa at present, we found that the risk  
36 311 of COVID-19 infection is likely to become rather high in other regions. The high infection rate  
37 312 in Addis Ababa at this initial stage is expected, given that Addis Ababa is a major travel hub  
38 313 and Bole International Airport, located in the city, is one of the largest international airports in  
39 314 Africa. This exposes the city to a higher risk of imported cases and, subsequently, to an early  
40 315 surge of infections, leaving the areas outside the city at a higher risk of later infection. Second,  
41 316 we considered multifaceted risk factors (indicators) for COVID-19 infection in our geospatial

1  
2  
3 317 model. This means that although the city has a high degree of connectivity, it is also  
4  
5 318 characterised by higher scores for information penetration, knowledge of disease prevention  
6  
7 319 and hand hygiene practices that could help slow the rate of infection in the city<sup>13</sup>. Third, Addis  
8  
9 320 Ababa has relatively better and more consistent test-and-contact tracing practices than in other  
10  
11 321 parts of the country, which means that the chance of new infections being detected in the city  
12  
13 322 are much greater than in other parts of the country<sup>5</sup>. Future efforts to expand testing and tracing  
14  
15 323 practices in other areas of the county are likely to increase the extent of confirmed infections  
16  
17 324 in those other areas. Recent studies have demonstrated that effective social distancing and  
18  
19 325 contact tracing can significantly reduce the rate of infection<sup>33,34</sup>. These interventions should  
20  
21 326 be strengthened and expanded to areas identified as high risk in this study.

22  
23 327 Our study also showed that the risk for severe cases of COVID-19 infection is high in most  
24  
25 328 parts of the Amhara and Oromia regions. This may be due to the high prevalence of NCDs,  
26  
27 329 which are associated with severe cases of COVID-19. Previous studies have revealed that the  
28  
29 330 burden of NCDs, such as DM and hypertension, is high in these two regions<sup>24,35,36</sup>. With the  
30  
31 331 COVID-19 epidemic evolving rapidly in Ethiopia, fast-tracked public health education and  
32  
33 332 interventions to control and limit the spread of infection should be strengthened. In addition,  
34  
35 333 to address severe cases and potential mortality risks, strengthening and expanding tailored  
36  
37 334 health care services, including ICUs in high-risk areas, are crucial to prevent the exacerbation  
38  
39 335 of the COVID-19-induced public health crisis.

40  
41 336 Our study also revealed that peripheral areas sharing international borders are likely to see a  
42  
43 337 greater number of COVID-19-related deaths. The high risk of death along the border areas  
44  
45 338 might be attributed to low preparedness in case management and weak health care systems. In  
46  
47 339 contrast, although the Amhara and Oromia regions may have more severe cases, the  
48  
49 340 preparedness indicators show that the regions are better equipped to cope with these anticipated  
50  
51 341 severe cases. However, our study suggests that additional preparation and capacity  
52  
53 342 strengthening are needed mainly in the following areas: emergency response systems, case  
54  
55 343 detection and capacity to care for patients. It is also equally important that hospitals have  
56  
57 344 adequate supplies, health care personnel and life-saving medical intervention resources.  
58  
59 345 Despite encouraging efforts by the Ethiopian government and stakeholders to prepare the  
60  
346 health care system for the pandemic, the existing health care services in the country may face  
347 unprecedented challenges and crises due to the surge of patients that will require hospitalisation  
348 and ICU services at the same time. This can, however, be eased by implementing public health  
349 and social measures at the individual, community, and public authority levels to prevent

1  
2  
3 350 infections and subsequent health, economic, and social consequences <sup>37</sup>. Studies have shown  
4  
5 351 that implementing non-pharmaceutical interventions, especially during the early stages of  
6  
7 352 infection, can reduce transmission and subsequent potential public health and economic crises  
8  
9 353 <sup>38</sup>.

10  
11 354 Further, we found notable regional disparities in health system preparedness and readiness  
12  
13 355 levels in the country. This is important because if the health care system is well equipped to  
14  
15 356 prevent and mitigate the spread of the pandemic, then the mortality rate from the disease can  
16  
17 357 be markedly reduced <sup>39</sup>. However, we observed that Ethiopia's border regions (i.e.,  
18  
19 358 Benishangul-Gumuz, Gambella, Afar, and Somali) have low preparedness levels.  
20  
21 359 Nevertheless, comparisons need to be treated with care because Ethiopia in general has very  
22  
23 360 low doctor-to-resident (1 doctor per 10,000 people) and hospital bed-to-population (3 hospital  
24  
25 361 beds per 10,000 people) ratios <sup>40</sup>. Several long-, medium- and short-term strategies, can be  
26  
27 362 implemented to mitigate these problems: (i) providing short-term training for potential actors  
28  
29 363 such as community leaders, students, and traditional and modern medical practitioners, (ii)  
30  
31 364 recruiting additional staff to work in COVID-19-related health care, (iii) establishing COVID-  
32  
33 365 19 clinics and changing outpatient rooms to emergency clinics, (iv) collaborating with private  
34  
35 366 hospitals ahead of surges so that they can be used in the case such surges occur, and (v)  
36  
37 367 establishing mobile clinics and temporary admission rooms in highly vulnerable areas.

## 368 **Policy implications**

38  
39 369 The findings of this study provide vital evidence that can inform policymakers in allocating  
40  
41 370 resources and guide health professionals in responding to and preventing COVID 19 infections.  
42  
43 371 With the limited resources that Ethiopia has, the measures implemented to limit the spread of  
44  
45 372 COVID-19 infection should be sustainable, should be tailored and should consider the national  
46  
47 373 and local contexts, such as varying socio-economic conditions. Strengthening the health care  
48  
49 374 system and improving the capacity of health extension workers (HEWs) needs to be top  
50  
51 375 priority. The national measures implemented in Ethiopia seem to be skewed towards  
52  
53 376 procurement-heavy interventions, such as establishing isolation facilities and obtaining  
54  
55 377 personal protective equipment and ventilators. While these interventions are critical,  
56  
57 378 community response should never be a secondary intervention. In this regard, the delayed  
58  
59 379 engagement of communities and HEWs hinders an effective outbreak response. Overall, it is  
60  
380 crucial that the Ethiopian government and all stakeholders strengthen their ongoing efforts to  
381  
prevent and slow the infection rate.



## 382 **Strength and Limitations**

383 This study has several strengths. First, the current study was conducted at a high level of  
384 resolution (1 km x 1 km) across the entire territory of Ethiopia. Second, it incorporated a wide  
385 range of indicators from multiple sources. Third, it applied rigorous geospatial techniques,  
386 including spatial autocorrelation, kriging and semivariograms, to provide the best possible  
387 prediction maps. Finally, we produced vulnerability mapping for infection or transmission,  
388 case severity, and associated death separately to assist with policy interventions related to each  
389 risk.

390 However, it is important to note some potential limitations of the study when interpreting the  
391 findings. First, the results need constant updating, as some of the time-varying variables used  
392 in the study can change when new interventions are introduced. Second, ongoing political  
393 turmoil in the country means that the dynamics of transmission may change depending on the  
394 location and severity of these incidents. Third, the calculation of the composite risk factor index  
395 was based on an unweighted average under the assumption that all indicators have equal  
396 importance, which may or may not be the case. Last, some important indicators, such as  
397 psychosocial and clinical factors, were not captured in our modelling due to the lack of  
398 geocoded data.

## 399 **Conclusions**

400 Although nearly three-quarters of the current COVID-19 cases reported in Ethiopia are  
401 concentrated in and around Addis Ababa, this study predicts that over time, the risk of COVID-  
402 19 infection will be higher across most other parts of the country. A higher proportion of people  
403 from the Amhara region, most of the Oromia region, and some parts of the SNNPR will develop  
404 severe cases of infection. Additionally, the risk of death will be higher in the regions of the  
405 country with low preparedness scores for COVID response. Hence, the preventative and  
406 control measures that are currently in place in the capital city should be strengthened and  
407 extended to regional areas, especially to high-risk areas, to prevent and mitigate the risk of  
408 COVID-19 infection, lower the number of severe cases, and limit the number of associated  
409 deaths in Ethiopia.

410

411

412

## 413 Declaration

### 414 Authors' contributions

415 KAA, YAG, YK, DMF, DNK, YAM, HAG, MB, MDM, AAA, and BAD conceptualised the  
416 study. KAA designed and run the geospatial analysis. YAG involved in the data analysis. KAA,  
417 YAG, DMF, DNK, and YAM drafted the manuscript. HAG, MB, AAA<sub>1</sub>, MDM, BAD, SA,  
418 AA, AAA<sub>2</sub>, WMB, KTG, TG, ATG, LGG, AG, HTK, GDK, CTL, LBM, AAM, HM, HGT,  
419 AGT, FT, BLW, and YK Critically reviewed and revised the drafted manuscript. KAA, YK,  
420 and AHM were responsible for quality control of accuracy and integrity of data. All the authors  
421 interpreted the data. All authors contributed to the final draft and finally approved it to be  
422 published. All authors agreed to be accountable for all aspects of the work for any issue related  
423 to the accuracy or integrity of any part of the work. The corresponding author attests that all  
424 listed authors meet authorship criteria and that no others meeting the criteria have been omitted.

425 **Funding:** There is no funding source for this study.

426 **Competing interests:** None declared.

427 **Patient and public involvement:** This research was done without patient and public  
428 involvement.

429 **Data availability statement:** Extra data is available by emailing the corresponding author  
430 (KAA): kefyalew.alene@curtin.edu.au

## 431 References

- 432 1. Yang P, Wang X. COVID-19: a new challenge for human beings. *Cellular & molecular*  
433 *immunology* 2020; **17**(5): 555-7.
- 434 2. Cucinotta D, Vanelli M. WHO declares COVID-19 a pandemic. *Acta bio-medica:*  
435 *Atenei Parmensis* 2020; **91**(1): 157-60.
- 436 3. WHO. Coronavirus disease ( COVID-19): situation report, 195. 2020.
- 437 4. Gilbert M, Pullano G, Pinotti F, et al. Preparedness and vulnerability of African  
438 countries against importations of COVID-19: a modelling study. *The Lancet* 2020; **395**(10227):  
439 871-7.
- 440 5. Baye K. COVID-19 prevention measures in Ethiopia: Current realities and prospects:  
441 Intl Food Policy Res Inst; 2020.
- 442 6. McKibbin WJ, Fernando R. The global macroeconomic impacts of COVID-19: Seven  
443 scenarios. Canberra: Australian National University, 2020.
- 444 7. Ji Y, Ma Z, Poppelbosch MP, Pan Q. Potential association between COVID-19  
445 mortality and health-care resource availability. *The Lancet Global Health* 2020; **8**(4): e480.
- 446 8. Mehra MR, Desai SS, Kuy S, Henry TD, Patel AN. Cardiovascular disease, drug  
447 therapy, and mortality in COVID-19. *New England Journal of Medicine* 2020.

- 1  
2  
3 448 9. ACSS. Mapping Risk Factors for the Spread of COVID-19 in Africa: Africa Center for  
4 449 Strategic Studies, 2020.
- 5 450 10. UN. Department of Economic and Social Affairs. Population Division, 2019.
- 6 451 11. Workie NW, Ramana GN. The health extension program in Ethiopia. 2013.
- 7 452 12. Areas GA. GADM database of global administrative areas. *Global Administrative*  
8 453 *Areas* 2012.
- 9 454 13. CSA. Ethiopia Demographic and Health Survey 2016. Addis Ababa, Ethiopia, and  
10 455 Rockville, Maryland, USA, 2016.
- 11 456 14. Tatem AJ. WorldPop, open data for spatial demography. *Scientific data* 2017; **4**(1): 1-  
12 457 4.
- 13 458 15. Weiss DJ, Nelson A, Gibson H, et al. A global map of travel time to cities to assess  
14 459 inequalities in accessibility in 2015. *Nature* 2018; **553**(7688): 333-6.
- 15 460 16. ICF. The DHS Program Spatial Data Repository. 2018.
- 16 461 17. Ballesteros P, Salazar E, Sánchez D, Bolanos C. Spatial and spatiotemporal clustering  
17 462 of the COVID-19 pandemic in Ecuador. *Revista de la Facultad de Medicina* 2020; **69**(1).
- 18 463 18. Bank W. Ethiopia Roads. 2014.
- 19 464 19. Zhong B-L, Luo W, Li H-M, et al. Knowledge, attitudes, and practices towards  
20 465 COVID-19 among Chinese residents during the rapid rise period of the COVID-19 outbreak:  
21 466 a quick online cross-sectional survey. *International journal of biological sciences* 2020;  
22 467 **16**(10): 1745.
- 23 468 20. Anderson RM, Heesterbeek H, Klinkenberg D, Hollingsworth TD. How will country-  
24 469 based mitigation measures influence the course of the COVID-19 epidemic? *The Lancet* 2020;  
25 470 **395**(10228): 931-4.
- 26 471 21. Xiao Y, Torok ME. Taking the right measures to control COVID-19. *The Lancet*  
27 472 *Infectious Diseases* 2020; **20**(5): 523-4.
- 28 473 22. Testino G. Are patients with alcohol use disorders at increased risk for Covid-19  
29 474 infection? *Alcohol and Alcoholism (Oxford, Oxfordshire)* 2020.
- 30 475 23. Zheng Z, Peng F, Xu B, et al. Risk factors of critical & mortal COVID-19 cases: A  
31 476 systematic literature review and meta-analysis. *Journal of Infection* 2020.
- 32 477 24. EPHI. Ethiopia STEPS report on risk factors for chronic non-communicable diseases  
33 478 and prevalence of selected NCDS. Addis Ababa, 2016.
- 34 479 25. EPHI. Ethiopia Service Availability and Readiness Assessment (SARA) Final Report.  
35 480 . Addis Ababa, 2018.
- 36 481 26. Fick SE, Hijmans RJ. WorldClim 2: new 1-km spatial resolution climate surfaces for  
37 482 global land areas. *International journal of climatology* 2017; **37**(12): 4302-15.
- 38 483 27. Burrough P. GIS and geostatistics: Essential partners for spatial analysis.  
39 484 *Environmental and ecological statistics* 2001; **8**(4): 361-77.
- 40 485 28. Childs C. Interpolating surfaces in ArcGIS spatial analyst. *ArcUser, July-September*  
41 486 *2004*; **3235**(569): 32-5.
- 42 487 29. Negreiros J, Painho M, Aguilar F, Aguilar M. Geographical information systems  
43 488 principles of ordinary kriging interpolator. *Journal of Applied Sciences* 2010; **10**(11): 852-67.
- 44 489 30. Patro S, Sahu KK. Normalization: A preprocessing stage. *arXiv preprint*  
45 490 *arXiv:150306462* 2015.
- 46 491 31. Moore M, Gelfeld B, Okunogbe A, Christopher P. Identifying future disease hot spots:  
47 492 infectious disease vulnerability index: Rand Corporation; 2016.
- 48 493 32. Team RC. R: A language and environment for statistical computing [Internet]. Vienna  
49 494 (Austria): R Foundation for Statistical Computing [cited 2019 Aug 8]. 2020.
- 50 495 33. Siraj DS, Siraj AS, Mapes A. Early estimates of COVID-19 infections in small, medium  
51 496 and large population clusters. *medRxiv* 2020.

- 1  
2  
3 497 34. Getaneh Y, Yizengaw A, Adane S, et al. Global lessons and Potential strategies in  
4 498 combating COVID-19 pandemic in Ethiopia: Systematic Review. *medRxiv* 2020.
- 5 499 35. Tesfaye TD, Temesgen WA, Kasa AS, Yismaw YS. Prevalence and associated factors  
6 500 of hypertension in Amhara regional state city and its' surrounding rural districts: a community-  
7 501 based cross-sectional study. *African Health Sciences* 2019; **19**(3): 2580-90.
- 8 502 36. Kibret KT, Mesfin YM. Prevalence of hypertension in Ethiopia: a systematic meta-  
9 503 analysis. *Public Health Reviews* 2015; **36**(1): 1-12.
- 10 504 37. Hartley DM, Perencevich EN. Public health interventions for COVID-19: emerging  
11 505 evidence and implications for an evolving public health crisis. *Jama* 2020; **323**(19): 1908-9.
- 12 506 38. Pan A, Liu L, Wang C, et al. Association of public health interventions with the  
13 507 epidemiology of the COVID-19 outbreak in Wuhan, China. *Jama* 2020; **323**(19): 1915-23.
- 14 508 39. Stafford N. Covid-19: Why Germany's case fatality rate seems so low. *Bmj* 2020; **369**.
- 15 509 40. Organization WH. Density of physicians (total number per 1000 population, latest  
16 510 available year). *Global Health Observatory (GHO) data* 2017.
- 17 511 41. Williamson E, Walker AJ, Bhaskaran KJ, et al. OpenSAFELY: factors associated with  
18 512 COVID-19-related hospital death in the linked electronic health records of 17 million adult  
19 513 NHS patients. *medRxiv* 2020.
- 20 514 42. Ahmadi M, Sharifi A, Dorosti S, Ghouschi SJ, Ghanbari N. Investigation of effective  
21 515 climatology parameters on COVID-19 outbreak in Iran. *Science of The Total Environment*  
22 516 2020: 138705.
- 23 517 43. Ahmad K, Erqou S, Shah N, et al. Association of Poor Housing Conditions with  
24 518 COVID-19 Incidence and Mortality Across US Counties. *medRxiv* 2020.
- 25 519 44. Ho FK, Celis-Morales CA, Gray SR, et al. Modifiable and non-modifiable risk factors  
26 520 for COVID-19: results from UK Biobank. *medRxiv* 2020.
- 27 521 45. Zheng R, Xu Y, Wang W, Ning G, Bi Y. Spatial transmission of COVID-19 via public  
28 522 and private transportation in China. *Travel Medicine and Infectious Disease* 2020.
- 29 523 46. Chinazzi M, Davis JT, Ajelli M, et al. The effect of travel restrictions on the spread of  
30 524 the 2019 novel coronavirus (COVID-19) outbreak. *Science* 2020; **368**(6489): 395-400.
- 31 525 47. Tian H, Liu Y, Li Y, et al. An investigation of transmission control measures during  
32 526 the first 50 days of the COVID-19 epidemic in China. *Science* 2020; **368**(6491): 638-42.
- 33 527 48. Holtmann M, Jones M, Shah A, Holtmann G. Low ambient temperatures are associated  
34 528 with more rapid spread of COVID-19 in the early phase of the endemic. *Environmental*  
35 529 *Research* 2020.
- 36 530 49. Sobral MFF, Duarte GB, da Penha Sobral AIG, Marinho MLM, de Souza Melo A.  
37 531 Association between climate variables and global transmission of SARS-CoV-2. *Science of*  
38 532 *The Total Environment* 2020; **729**: 138997.
- 39 533 50. Wang J, Tang K, Feng K, Lv W. High temperature and high humidity reduce the  
40 534 transmission of COVID-19. *Available at SSRN 3551767* 2020.
- 41 535 51. Li J, Zhang L, Ren Z, Xing C, Qiao P, Chang B. Meteorological factors correlate with  
42 536 transmission of 2019-nCoV: Proof of incidence of novel coronavirus pneumonia in Hubei  
43 537 Province, China. *medRxiv* 2020.
- 44 538 52. Basker GV. A review on hazards of khat chewing. *Int J Pharm Pharm Sci* 2013; **5**(3):  
45 539 74-7.
- 46 540 53. Lopes H, McKay V, de Cima P. ADULT LEARNING EDUCATION AS A TOOL TO  
47 541 CONTAIN PANDEMICS: THE COVID-19 EXPERIENCE.
- 48 542 54. Ayedee N, Manocha D. Role of Media (Television) in Creating a Positive Atmosphere  
49 543 in COVID-19 during Lockdown in India. *Role of Media (Television) in Creating a Positive*  
50 544 *Atmosphere in COVID-19 during Lockdown in India (May 19, 2020)* 2020.
- 51 545 55. Wood CS, Thomas MR, Budd J, et al. Taking connected mobile-health diagnostics of  
52 546 infectious diseases to the field. *Nature* 2019; **566**(7745): 467-74.

- 1  
2  
3 547 56. Bertozzi S, Padian NS, Wegbreit J, et al. HIV/AIDS prevention and treatment. *Disease*  
4 548 *control priorities in developing countries* 2006; **2**: 331-70.
- 5 549 57. WHO. Water, sanitation, hygiene, and waste management for the COVID-19 virus:  
6 550 interim guidance, 23 April 2020: World Health Organization, 2020.
- 7 551 58. WHO. Infection prevention and control guidance for long-term care facilities in the  
8 552 context of COVID-19: interim guidance, 21 March 2020: World Health Organization, 2020.
- 9 553 59. WHO. WHO Releases Guidelines to Help Countries Maintain Essential Health Services  
10 554 During the COVID-19 Pandemic. Geneva, Switzerland: World Health Organization; 2020.
- 11 555 60. Murthy S, Gomersall CD, Fowler RA. Care for critically ill patients with COVID-19.  
12 556 *Jama* 2020; **323**(15): 1499-500.
- 13 557 61. Tadolini M, Codecasa LR, García-García J-M, et al. Active tuberculosis, sequelae and  
14 558 COVID-19 co-infection: first cohort of 49 cases. *European Respiratory Journal* 2020.
- 15  
16  
17  
18 559  
19  
20 560  
21  
22 561  
23  
24 562  
25  
26 563  
27  
28 564  
29  
30 565  
31  
32 566  
33  
34 567  
35  
36 568  
37  
38 569  
39  
40 570  
41  
42 571  
43  
44 572  
45  
46 573  
47  
48 574  
49  
50 575  
51  
52 576  
53  
54 577  
55  
56 578  
57  
58 579  
59  
60 580  
581

582 **Tables**

583 **Table 1:** Data sources and definitions of indicators for the vulnerability of COVID-19 in  
 584 Ethiopia.

| Indicators                                     | Data sources           | Definitions                                                                                                                                                                                                    |
|------------------------------------------------|------------------------|----------------------------------------------------------------------------------------------------------------------------------------------------------------------------------------------------------------|
| <b>Demographic indicators</b>                  |                        |                                                                                                                                                                                                                |
| Male sex                                       | EDHS 2016              | Total number of male populations divided by the total number of people participated in the survey                                                                                                              |
| Older age                                      | EDHS 2016              | Total number of people with age $\geq 65$ years divided by the total number of people participated in the survey                                                                                               |
| <b>Socio-economic indicators</b>               |                        |                                                                                                                                                                                                                |
| Population density                             | WorldPop               | Number of people per square kilometre (grid)                                                                                                                                                                   |
| Number of household members                    | EDHS 2016              | Average number of people living in a house                                                                                                                                                                     |
| Low wealth index                               | EDHS 2016              | Number of people with low wealth index (poorer and poorest) divided by the total number of people participated in the survey                                                                                   |
| <b>Connectivity indicators</b>                 |                        |                                                                                                                                                                                                                |
| Travel times to cities                         | MAP                    | Travel time in minutes to the nearest city with a population of more than 50,000                                                                                                                               |
| Proximity to national borders                  | DHS Spatial Repository | The geodesic distance to the nearest international borders                                                                                                                                                     |
| Distance to major roads                        | World Bank             | Distance in km to cross-country round                                                                                                                                                                          |
| <b>Climatic indicators</b>                     |                        |                                                                                                                                                                                                                |
| Mean temperature                               | WorldClim              | Annual mean environmental air temperature ( $^{\circ}\text{C}$ )                                                                                                                                               |
| Mean precipitation                             | WorldClim              | Annual mean rainfall (mm)                                                                                                                                                                                      |
| Wind speed                                     | WorldClim              | Annual mean wind speed ( $\text{m s}^{-1}$ )                                                                                                                                                                   |
| Solar radiation                                | WorldClim              | Annual mean solar radiation ( $\text{kJ m}^{-2} \text{day}^{-1}$ )                                                                                                                                             |
| Water vapour pressure                          | WorldClim              | Annual mean water vapour pressure (kPa), equivalent to absolute humidity.                                                                                                                                      |
| <b>Behavioural indicators</b>                  |                        |                                                                                                                                                                                                                |
| Khat chewing                                   | EDHS 2016              | Total number of people chewing khat in the last one month prior to the survey divided by the total number of people participating in the survey                                                                |
| Alcohol drinking                               | EDHS 2016              | Total number of people drinking alcohol in the month prior to the survey divided by the total number of people participating in the survey                                                                     |
| Cigarette smoking                              | EPHI STEPS             | Total number of people currently smoke cigarettes divided by the total number of people participating in the survey                                                                                            |
| Cooking inside the household                   | EDHS 2016              | Total number of households where cooking takes place inside the house without a separate building or outdoors (i.e. exposure to smoke inside the home) divided by the total number of households in the survey |
| Use solid fuel for cooking                     | EDHS 2016              | Number of households used some type of solid fuel (wood, dung, grass, crop) for cooking food divided by all households in the survey                                                                           |
| <b>Disease prevention knowledge indicators</b> |                        |                                                                                                                                                                                                                |
| Adult illiteracy rate                          | EDHS 2016              | Total number of adults (aged 15 years and above) who had not attended school or who cannot read and write divided by the total number of adults participated in the survey                                     |
| Access to listen to the radio                  | EDHS 2016              | Total number of people who had not access to listen to the radio divided by total survey participants                                                                                                          |
| Access to watch TV                             | EDHS 2016              | Total number of people have no access to watch television divided by total survey participants                                                                                                                 |

1

2

|                                                                                                                                                                                                                                                                                                                                                                                |            |                                                                                                                                                                                       |
|--------------------------------------------------------------------------------------------------------------------------------------------------------------------------------------------------------------------------------------------------------------------------------------------------------------------------------------------------------------------------------|------------|---------------------------------------------------------------------------------------------------------------------------------------------------------------------------------------|
| 3 Mobile phone ownership                                                                                                                                                                                                                                                                                                                                                       | EDHS 2016  | Total number of people have no access to mobile phone divide by the total number of survey participants                                                                               |
| 4 Knowledge toward HIV                                                                                                                                                                                                                                                                                                                                                         | EDHS 2016  | Number of people with poor knowledge towards HIV divided by the total number of people participating in the survey                                                                    |
| <b>Hand hygiene indicators</b>                                                                                                                                                                                                                                                                                                                                                 |            |                                                                                                                                                                                       |
| 9 Travel time to water sources                                                                                                                                                                                                                                                                                                                                                 | EDHS 2016  | Mean travel time in minutes to obtain water source (i.e. access to a water source)                                                                                                    |
| 11 Place for handwashing                                                                                                                                                                                                                                                                                                                                                       | EDHS 2016  | Number of households have no fixed or mobile place for handwashing divided by total number of households in the survey                                                                |
| 13 Soap or detergent availability for handwashing                                                                                                                                                                                                                                                                                                                              | EDHS 2016  | Number of households have no essential handwashing agents (i.e. soap, and detergent) divided by total household in the survey                                                         |
| <b>Comorbidities indicators</b>                                                                                                                                                                                                                                                                                                                                                |            |                                                                                                                                                                                       |
| 17 HTN                                                                                                                                                                                                                                                                                                                                                                         | EPHI STEPS | Total number of people with HTN divided by the total number of survey participants                                                                                                    |
| 19 DM                                                                                                                                                                                                                                                                                                                                                                          | EPHI STEPS | Total number of people with DM divided by the total number of survey participants                                                                                                     |
| 21 BMI                                                                                                                                                                                                                                                                                                                                                                         | EPHI STEPS | Mean body mass index                                                                                                                                                                  |
| 23 CVD                                                                                                                                                                                                                                                                                                                                                                         | EPHI STEPS | Total number of people with heart disease divided by total number of people in the survey                                                                                             |
| 25 Cholesterol                                                                                                                                                                                                                                                                                                                                                                 | EPHI STEPS | Mean cholesterol level                                                                                                                                                                |
| 26 HIV prevalence                                                                                                                                                                                                                                                                                                                                                              | EDHS 2016  | Total number of people with HIV divided by survey participants                                                                                                                        |
| 27 TB SMR                                                                                                                                                                                                                                                                                                                                                                      | EMOH       | Standardized morbidity ratio (SMR) as measured by observed number of TB cases divided by the expected number of TB cases                                                              |
| <b>Service availability and readiness indicators</b>                                                                                                                                                                                                                                                                                                                           |            |                                                                                                                                                                                       |
| 30 Health care access problem                                                                                                                                                                                                                                                                                                                                                  | EDHS 2016  | Difficulty of getting advice or treatment due to lack of money, or distance to a health facility                                                                                      |
| 32 General service readiness and availability                                                                                                                                                                                                                                                                                                                                  | EPHI SARA  | Availability of equipment and supplies (i.e. basic amenities, equipment, standard precautions, diagnostic capacity, essential medicines) necessary to provide general health services |
| 36 ICU availability                                                                                                                                                                                                                                                                                                                                                            | EPHI SARA  | Availability of Critical Care Services (ICU) in hospitals                                                                                                                             |
| 37 CRD readiness index                                                                                                                                                                                                                                                                                                                                                         | EPHI SARA  | Availability of specific services for Chronic respiratory disease (CRD) diagnosis, management, and follow up                                                                          |
| 39 TB readiness index                                                                                                                                                                                                                                                                                                                                                          | EPHI SARA  | Availability of specific services for tuberculosis diagnosis, management, and follow up                                                                                               |
| 41 Diabetes readiness index                                                                                                                                                                                                                                                                                                                                                    | EPHI SARA  | Availability of specific service for diabetes diagnosis and management and follow up                                                                                                  |
| 43 <i>G-Econ: Geographically based Economic data; EDHS: Ethiopia demographic and health survey; UN OCHA: United Nation Office for Coordination of Humanitarian Affairs; MAP: SRTM: Malaria Atlas Project; Shuttle Radar Topography Mission; EPHI: Ethiopia Public Health Institute; EMOH: Ethiopia Ministry of Health; SARA: Service Availability and Readiness Assessment</i> |            |                                                                                                                                                                                       |

47

585

48

586

49

587

50

588

51

589

52

590

53

591

54

592

55

593

56

594

57

595

58

596

59

597

60

598 **Table 2: Evidence for risk of COVID-19 infection, severity, and death**

| Indicators                                     | Risk factors | Evidence                                                                                                                           | References                                |
|------------------------------------------------|--------------|------------------------------------------------------------------------------------------------------------------------------------|-------------------------------------------|
| <b>Demographic indicators</b>                  |              |                                                                                                                                    |                                           |
| Male sex                                       | Severity     | Death from and severity of COVID-19 was strongly associated with being male (HR 1.99, 95%CI: 1.88-2.10)                            | Williamson E <sup>41</sup>                |
| Older age                                      | Severity     | Older than 65 years were risk factors for disease progression in patients with COVID-19 (OR =6.06, 95% CI: 3.98, 9.22)             | Zheng Z <sup>23</sup>                     |
| <b>Socio-economic indicators</b>               |              |                                                                                                                                    |                                           |
| Population density                             | Infection    | High population density is a risk factor for COVID-19 infection                                                                    | Ahmadi M <sup>42</sup>                    |
| Number of household members                    | Infection    | Areas with a higher percentage of households with more than one person per room had a higher incidence of COVID-19                 | Ahmad K <sup>43</sup>                     |
| Low wealth index                               | Infection    | Socio-economic deprivation (RR 1.26 per SD increase in Townsend Index) associated with COVID -19 infection                         | Ho FK <sup>44</sup>                       |
| <b>Connectivity indicators</b>                 |              |                                                                                                                                    |                                           |
| Travel times to cities                         | Infection    | The distance between Wuhan and other cities was inversely associated with the numbers of COVID-19 cases in that city               | Zheng R <sup>45</sup>                     |
| Proximity to national borders                  | Infection    | Cross country moment is a risk factor for COVID-19 transmission and importation                                                    | Chinazz M <sup>46</sup>                   |
| Distance to major roads                        | Infection    | Spread of COVID-19 was correlated positively with public transportation per capita                                                 | Tian H <sup>47</sup>                      |
| <b>Climatic indicators</b>                     |              |                                                                                                                                    |                                           |
| Mean temperature                               | Infection    | Low ambient temperatures are associated with more rapid spread of COVID-19                                                         | Holtmann M <sup>48</sup>                  |
| Mean precipitation                             | Infection    | Countries with higher rainfall measurements showed an increase in COVID-19 transmission                                            | Sobral MFF <sup>49</sup>                  |
| Wind speed                                     | Infection    | Areas with low values of wind speed associated with a high rate of COVID-19 infection                                              | Ahmadi M <sup>42</sup>                    |
| Solar radiation                                | Infection    | Areas with low values of solar radiation exposure associated with a high rate of COVID-19 infection                                | Ahmadi M <sup>42</sup>                    |
| Water vapour pressure                          | Infection    | High humidity reduces the transmission of COVID-19. Water vapour pressure negatively correctly with COVID-19 infection.            | Wang J <sup>50</sup> , Li J <sup>51</sup> |
| <b>Behavioural indicators</b>                  |              |                                                                                                                                    |                                           |
| Khat chewing                                   | Severity     | There is an association between khat chewing and chronic illness such as HIV infection, elevated diastolic blood pressure          | Basker GV <sup>52</sup>                   |
| Alcohol drinking                               | Severity     | Patients with alcohol use disorders at increased risk for COVID-19                                                                 | Testino G <sup>22</sup>                   |
| Cigarette smoking                              | Severity     | Current smoking was a risk factor for disease progression in patients with COVID-19 (OR =2.51, 95% CI: 1.39, 3.32)                 | Zheng Z <sup>23</sup>                     |
| Cooking inside the household                   | Severity     | Areas with a higher percentage of incomplete kitchen facilities had a higher incidence of, and mortality associated with, COVID-19 | Ahmad K <sup>43</sup>                     |
| Use solid fuel for cooking                     | Severity     | Areas with a higher percentage of incomplete kitchen facilities had a higher incidence of, and mortality associated with, COVID-19 | Ahmad K <sup>43</sup>                     |
| <b>Disease prevention knowledge indicators</b> |              |                                                                                                                                    |                                           |
| Adult illiteracy rate                          | Infection    | Adult learning education is a tool to contain the COVID-19 pandemics                                                               | Lopes H <sup>53</sup>                     |
| Access to listen to radio                      | Infection    | Access to media is a crucial factor in public health responses to an outbreak                                                      | Ayedee N <sup>54</sup>                    |
| Access to watch TV                             | Infection    | Media (Television) has a significant role in creating a positive atmosphere in COVID-19                                            | Ayedee N <sup>54</sup>                    |
| Mobile phone ownership                         | Infection    | Mobile phone calls and text messages help for the diagnosis, management, and control of infectious diseases                        | Wood S <sup>55</sup>                      |
| Knowledge towards HIV                          | Infection    | Knowledge towards an infectious disease such as HIV can help to control the transmission of the diseases                           | Bertozzi S <sup>56</sup>                  |
| <b>Hand hygiene indicators</b>                 |              |                                                                                                                                    |                                           |



1  
2

|                                                                                                                                                                                                                                                                                                                                                                                    |                                                |           |                                                                                                                             |                            |
|------------------------------------------------------------------------------------------------------------------------------------------------------------------------------------------------------------------------------------------------------------------------------------------------------------------------------------------------------------------------------------|------------------------------------------------|-----------|-----------------------------------------------------------------------------------------------------------------------------|----------------------------|
| 3<br>4<br>5<br>6<br>7<br>8<br>9<br>10                                                                                                                                                                                                                                                                                                                                              | Travel time to water sources                   | Infection | Adequate water supply is essential for the control of COVID-19 infection                                                    | WHO <sup>57</sup>          |
| 11<br>12<br>13<br>14<br>15<br>16<br>17<br>18<br>19<br>20<br>21<br>22                                                                                                                                                                                                                                                                                                               | Place for handwashing                          | Infection | Hand washing is recommended by WHO for the control of COVID-19 infection                                                    | WHO <sup>58</sup>          |
| 23<br>24<br>25<br>26<br>27<br>28<br>29<br>30<br>31<br>32<br>33<br>34<br>35<br>36<br>37<br>38<br>39<br>40                                                                                                                                                                                                                                                                           | Soap or detergent availability for handwashing | Infection | Availability of soap or detergent is essential to keep hand hygiene for the prevention of COVID-19 infection                | WHO <sup>58</sup>          |
| <b>Comorbidities indicators</b>                                                                                                                                                                                                                                                                                                                                                    |                                                |           |                                                                                                                             |                            |
| 11<br>12<br>13<br>14<br>15<br>16<br>17<br>18<br>19<br>20<br>21<br>22                                                                                                                                                                                                                                                                                                               | HTN                                            | Severity  | Hypertension was statistically significant with a higher rate of severity and death (OR = 2.72, 95% CI: 1.60, 4.64)         | Zheng Z <sup>23</sup>      |
| 23<br>24<br>25<br>26<br>27<br>28<br>29<br>30<br>31<br>32<br>33<br>34<br>35<br>36<br>37<br>38<br>39<br>40                                                                                                                                                                                                                                                                           | DM                                             | Severity  | Death from COVID-19 was associated with DM (HR 1.50, 95%CI: 1.40-1.60) 1.50                                                 | Williamson E <sup>41</sup> |
| 11<br>12<br>13<br>14<br>15<br>16<br>17<br>18<br>19<br>20<br>21<br>22                                                                                                                                                                                                                                                                                                               | BMI                                            | Severity  | Death from COVID-19 was associated with higher BMI (HR 1.27, 95%CI: 1.18-1.36)                                              | Williamson E <sup>41</sup> |
| 23<br>24<br>25<br>26<br>27<br>28<br>29<br>30<br>31<br>32<br>33<br>34<br>35<br>36<br>37<br>38<br>39<br>40                                                                                                                                                                                                                                                                           | CVD                                            | Severity  | Cardiovascular disease was significantly associated with higher COVID-19 severity and death (OR = 5.19, 95% CI: 3.25, 8.29) | Zheng Z <sup>23</sup>      |
| 11<br>12<br>13<br>14<br>15<br>16<br>17<br>18<br>19<br>20<br>21<br>22                                                                                                                                                                                                                                                                                                               | HIV prevalence                                 | Severity  | Mortality from COVID-19 was associated with immunosuppression (HR 1.69, 95%CI: 1.21-1.34)                                   | Williamson E <sup>41</sup> |
| 23<br>24<br>25<br>26<br>27<br>28<br>29<br>30<br>31<br>32<br>33<br>34<br>35<br>36<br>37<br>38<br>39<br>40                                                                                                                                                                                                                                                                           | BB SMR                                         | Severity  | respiratory diseases were significantly associated with COVID-19 death and severity (OR = 5.15, 95% CI: 2.51, 10.57)        | Zheng Z <sup>23</sup>      |
| <b>Service availability and readiness indicators</b>                                                                                                                                                                                                                                                                                                                               |                                                |           |                                                                                                                             |                            |
| 11<br>12<br>13<br>14<br>15<br>16<br>17<br>18<br>19<br>20<br>21<br>22                                                                                                                                                                                                                                                                                                               | Health care access problem                     | Death     | Healthcare resource availability is associated with COVID-19 mortality                                                      | Ji Y <sup>7</sup>          |
| 23<br>24<br>25<br>26<br>27<br>28<br>29<br>30<br>31<br>32<br>33<br>34<br>35<br>36<br>37<br>38<br>39<br>40                                                                                                                                                                                                                                                                           | General service readiness                      | Death     | General health service preparedness is essential for combating the COVID-19 pandemic                                        | WHO <sup>59</sup>          |
| 11<br>12<br>13<br>14<br>15<br>16<br>17<br>18<br>19<br>20<br>21<br>22                                                                                                                                                                                                                                                                                                               | ICU availability                               | Death     | Lack of critical care unite increase the risk of death from COVID-19                                                        | Murthy S <sup>60</sup>     |
| 23<br>24<br>25<br>26<br>27<br>28<br>29<br>30<br>31<br>32<br>33<br>34<br>35<br>36<br>37<br>38<br>39<br>40                                                                                                                                                                                                                                                                           | CRD readiness                                  | Death     | Cardiorespiratory disease (CRD) is a risk factor for COVID-19 related death                                                 | Zheng Z <sup>23</sup>      |
| 11<br>12<br>13<br>14<br>15<br>16<br>17<br>18<br>19<br>20<br>21<br>22                                                                                                                                                                                                                                                                                                               | TB readiness                                   | Death     | TB determinants outcomes of patients with COVID-19                                                                          | Tadolini M <sup>61</sup>   |
| 23<br>24<br>25<br>26<br>27<br>28<br>29<br>30<br>31<br>32<br>33<br>34<br>35<br>36<br>37<br>38<br>39<br>40                                                                                                                                                                                                                                                                           | Diabetes readiness                             | Death     | Diabetes affects the prognosis of patients with COVID-19                                                                    | Zheng Z <sup>23</sup>      |
| <p><i>G-Econ: Geographically based Economic data; EDHS: Ethiopia demographic and health survey; UN OCHA: United Nation Office for Coordination of Humanitarian Affairs; MAP: SRTM: Malaria Atlas Project; Shuttle Radar Topography Mission; EPHI: Ethiopia Public Health Institute; EMOH: Ethiopia Ministry of Health; SARA: Service Availability and Readiness Assessment</i></p> |                                                |           |                                                                                                                             |                            |

41 599

42  
43  
44  
45  
46  
47  
48  
49  
50  
51  
52  
53  
54  
55  
56  
57  
58  
59  
60

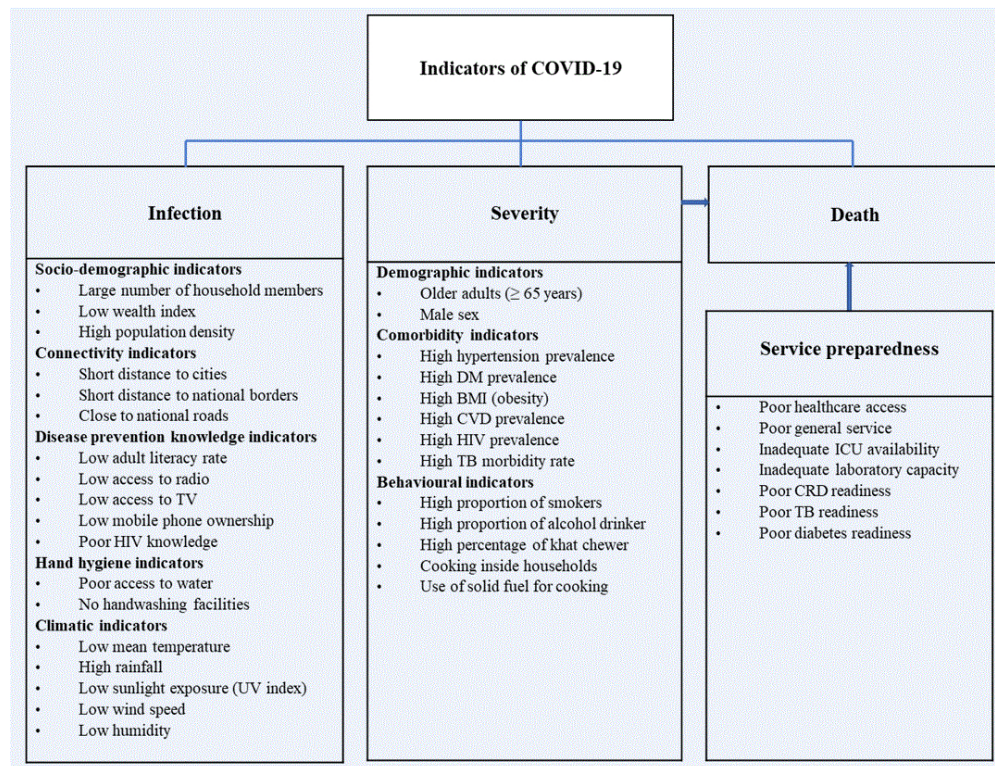

381x292mm (72 x 72 DPI)

1  
2  
3  
4  
5  
6  
7  
8  
9  
10  
11  
12  
13  
14  
15  
16  
17  
18  
19  
20  
21  
22  
23  
24  
25  
26  
27  
28  
29  
30  
31  
32  
33  
34  
35  
36  
37  
38  
39  
40  
41  
42  
43  
44  
45  
46  
47  
48  
49  
50  
51  
52  
53  
54  
55  
56  
57  
58  
59  
60

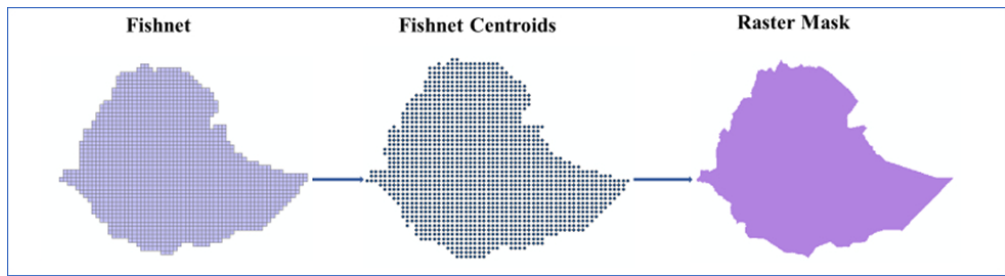

165x44mm (150 x 150 DPI)

1  
2  
3  
4  
5  
6  
7  
8  
9  
10  
11  
12  
13  
14  
15  
16  
17  
18  
19  
20  
21  
22  
23  
24  
25  
26  
27  
28  
29  
30  
31  
32  
33  
34  
35  
36  
37  
38  
39  
40  
41  
42  
43  
44  
45  
46  
47  
48  
49  
50  
51  
52  
53  
54  
55  
56  
57  
58  
59  
60

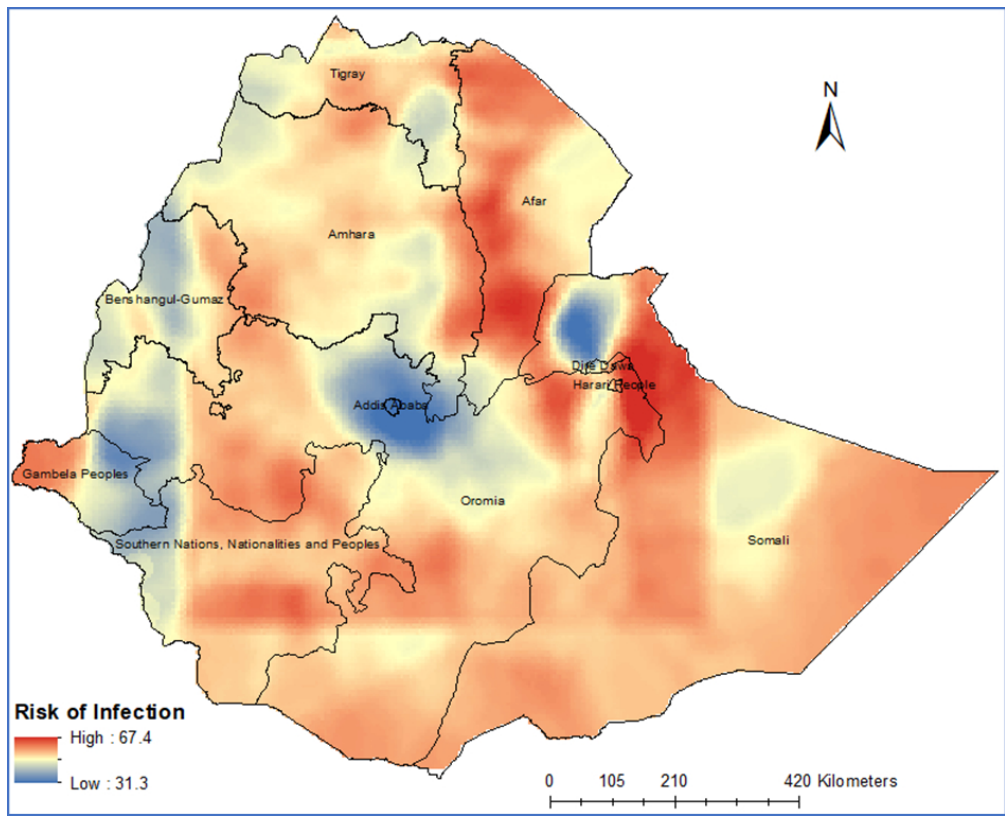

249x201mm (96 x 96 DPI)

1  
2  
3  
4  
5  
6  
7  
8  
9  
10  
11  
12  
13  
14  
15  
16  
17  
18  
19  
20  
21  
22  
23  
24  
25  
26  
27  
28  
29  
30  
31  
32  
33  
34  
35  
36  
37  
38  
39  
40  
41  
42  
43  
44  
45  
46  
47  
48  
49  
50  
51  
52  
53  
54  
55  
56  
57  
58  
59  
60

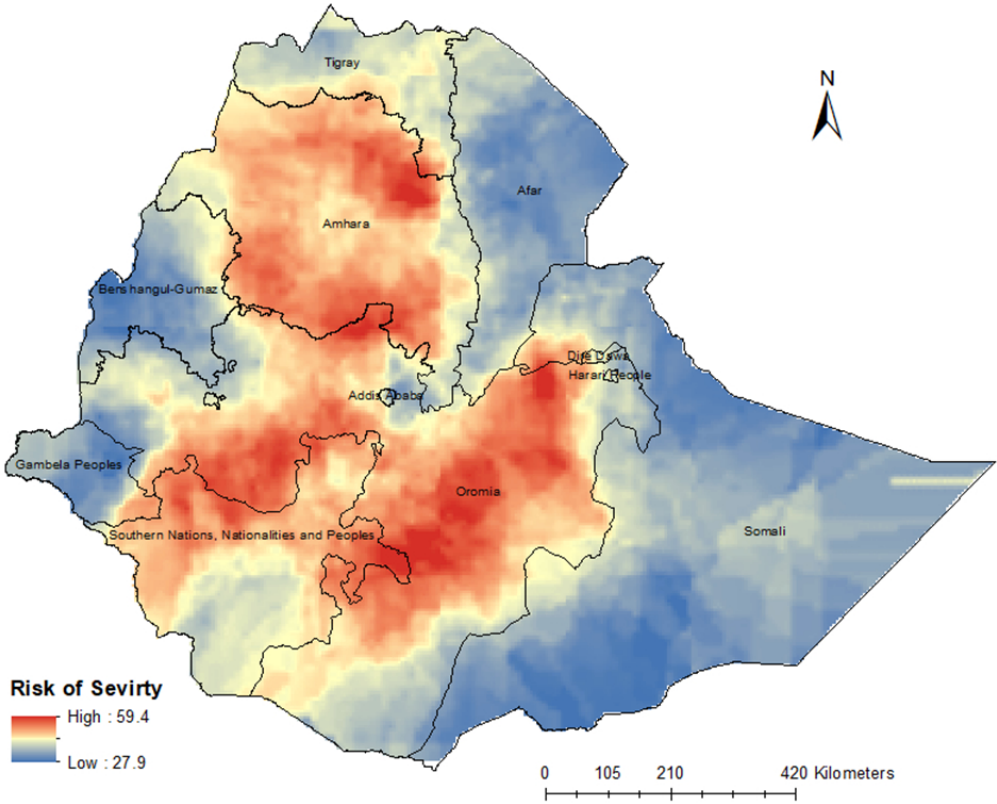

248x199mm (96 x 96 DPI)

1  
2  
3  
4  
5  
6  
7  
8  
9  
10  
11  
12  
13  
14  
15  
16  
17  
18  
19  
20  
21  
22  
23  
24  
25  
26  
27  
28  
29  
30  
31  
32  
33  
34  
35  
36  
37  
38  
39  
40  
41  
42  
43  
44  
45  
46  
47  
48  
49  
50  
51  
52  
53  
54  
55  
56  
57  
58  
59  
60

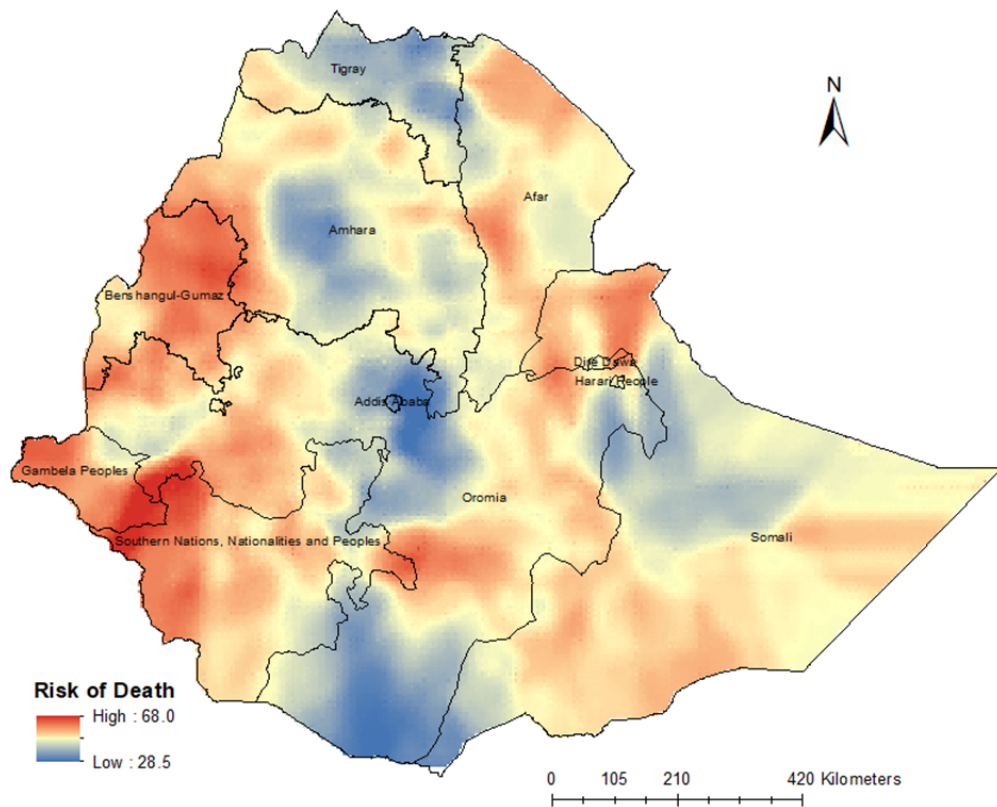

248x200mm (96 x 96 DPI)

1  
2  
3  
4  
5  
6  
7  
8  
9  
10  
11  
12  
13  
14  
15  
16  
17  
18  
19  
20  
21  
22  
23  
24  
25  
26  
27  
28  
29  
30  
31  
32  
33  
34  
35  
36  
37  
38  
39  
40  
41  
42  
43  
44  
45  
46  
47  
48  
49  
50  
51  
52  
53  
54  
55  
56  
57  
58  
59  
60

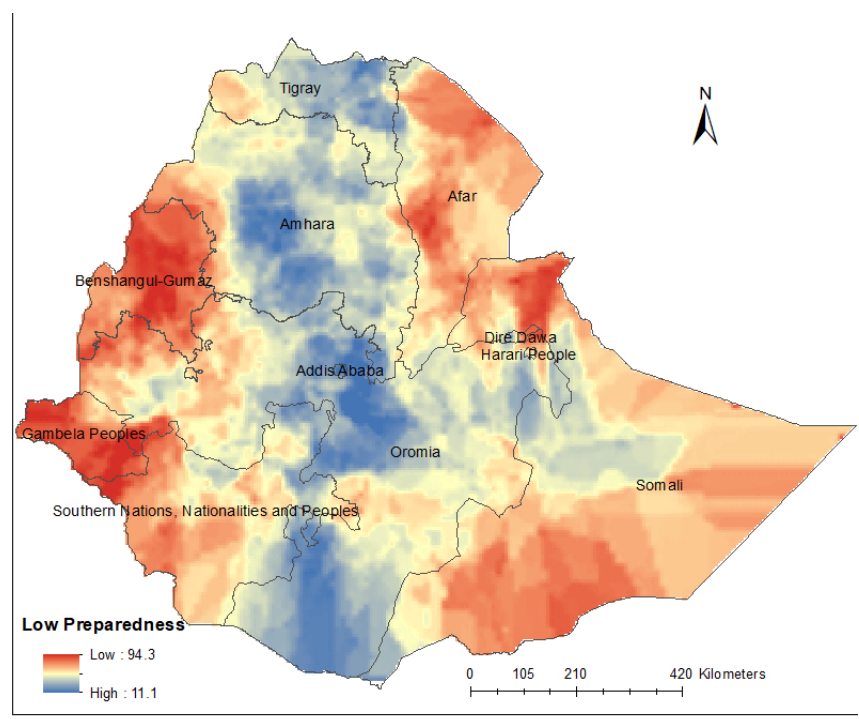

210x296mm (96 x 96 DPI)

**Supplemental Information**

**Supplemental Figure 1:** Vulnerability maps of COVID-19 infection, severity, preparedness, and death in Ethiopia, created based on a geometric mean as alternative aggregation method.

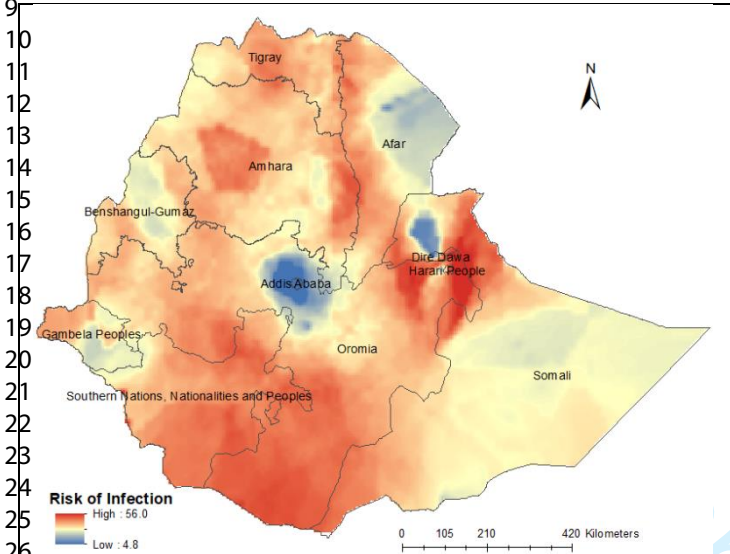

S Figure 1a. COVID-19 infection risk map in Ethiopia, created based on a geometric mean

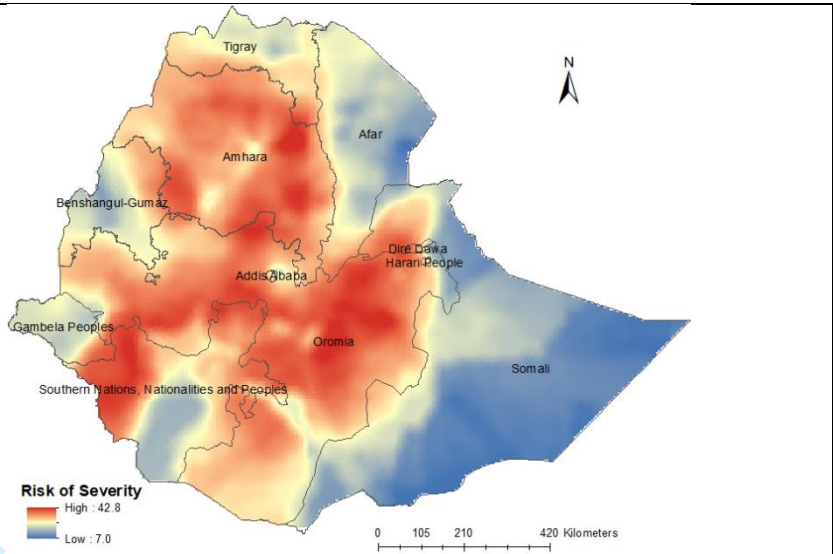

S Figure 1b. COVID-19 severity risk map in Ethiopia, created based on a geometric mean

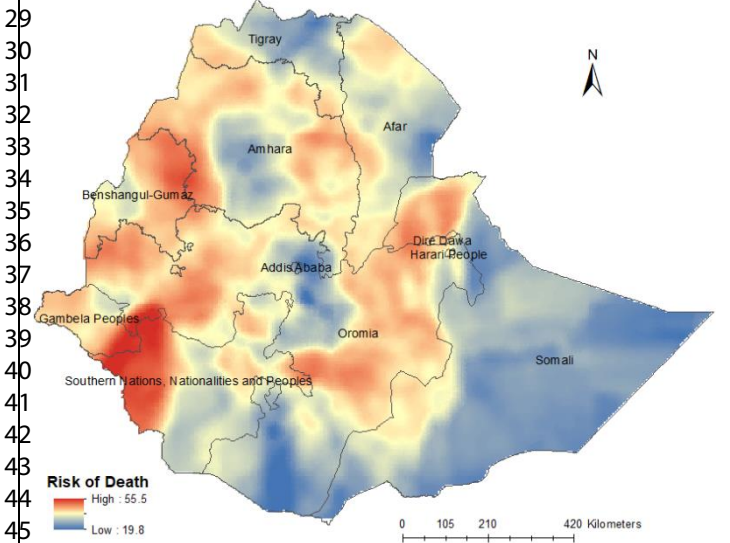

S Figure 2c. Death risk map of COVID-19 in Ethiopia, created based on a geometric mean

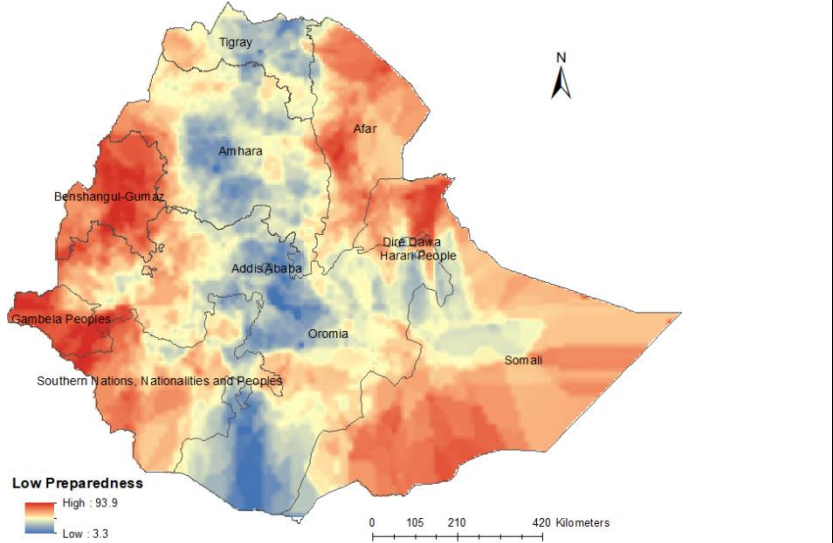

S Figure 3d. Service preparedness map of COVID-19 in Ethiopia, created based on a geometric mean



**Supplemental Figure 2: Vulnerability maps of COVID-19 infection, severity, preparedness, and death in Ethiopia, created based on a principal component analysis (PCA) as alternative aggregation method.**

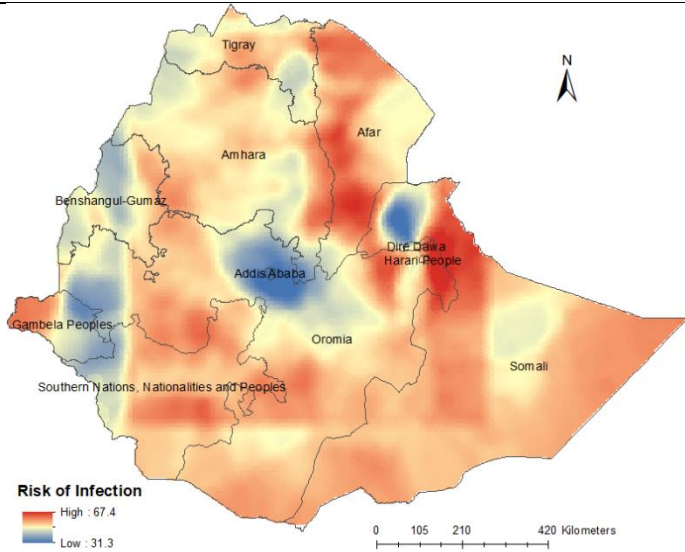

S Figure 2a. COVID-19 infection risk map in Ethiopia, created based on a geometric mean

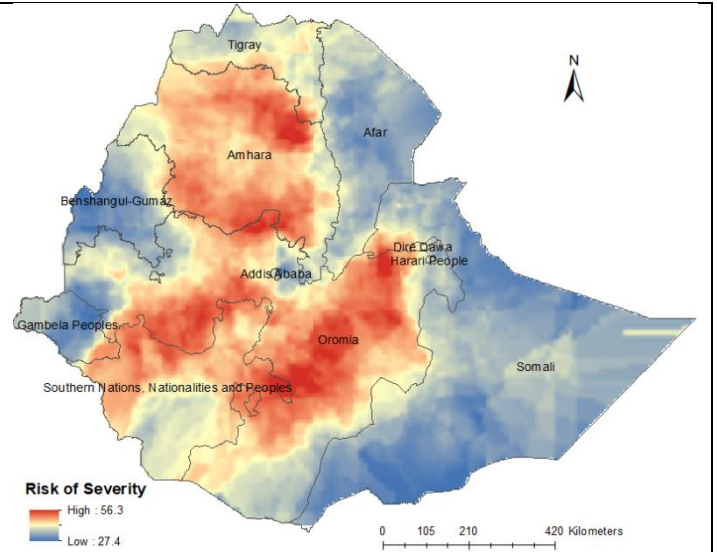

S Figure 2b. COVID-19 severity risk map in Ethiopia, created based on a geometric mean

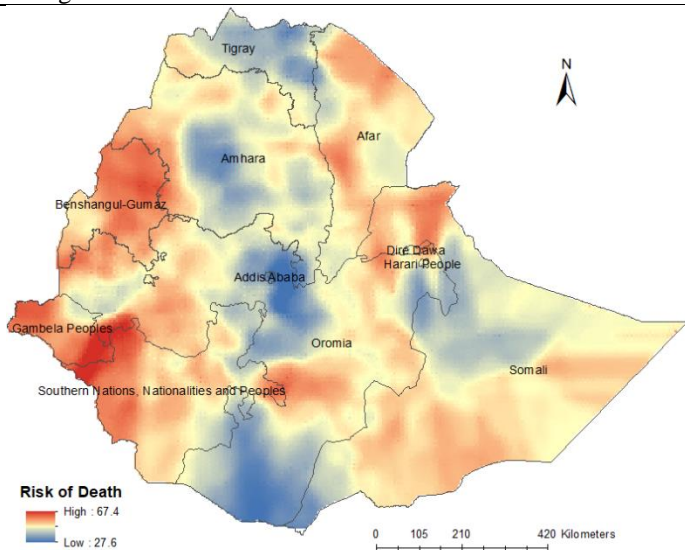

S Figure 2c. Death risk map of COVID-19 in Ethiopia, created based on a geometric mean

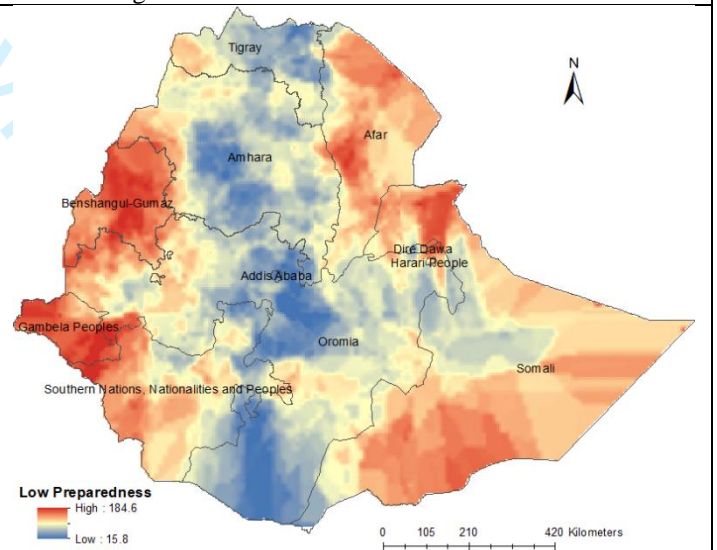

S Figure 2d. Service preparedness map of COVID-19 in Ethiopia, created based on a geometric mean

**Supplemental Figure 3:** Selected indicators showing the risk of COVID-19 infection in Ethiopia

1  
2  
3  
4  
5  
6  
7  
8  
9  
10  
11  
12  
13  
14  
15  
16  
17  
18  
19  
20  
21  
22  
23  
24  
25  
26  
27  
28  
29  
30  
31  
32  
33  
34  
35  
36  
37  
38  
39  
40  
41  
42  
43  
44  
45  
46  
47  
48  
49  
50  
51  
52  
53  
54  
55  
56  
57  
58  
59  
60

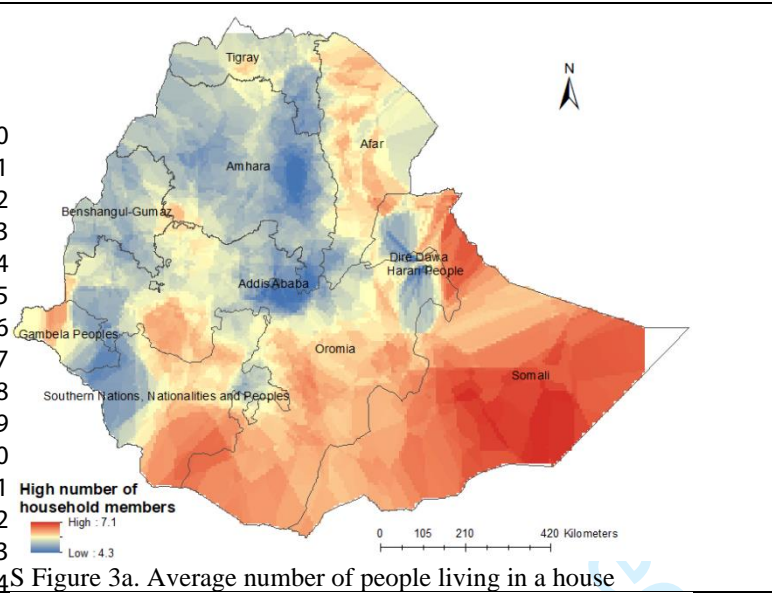

S Figure 3a. Average number of people living in a house

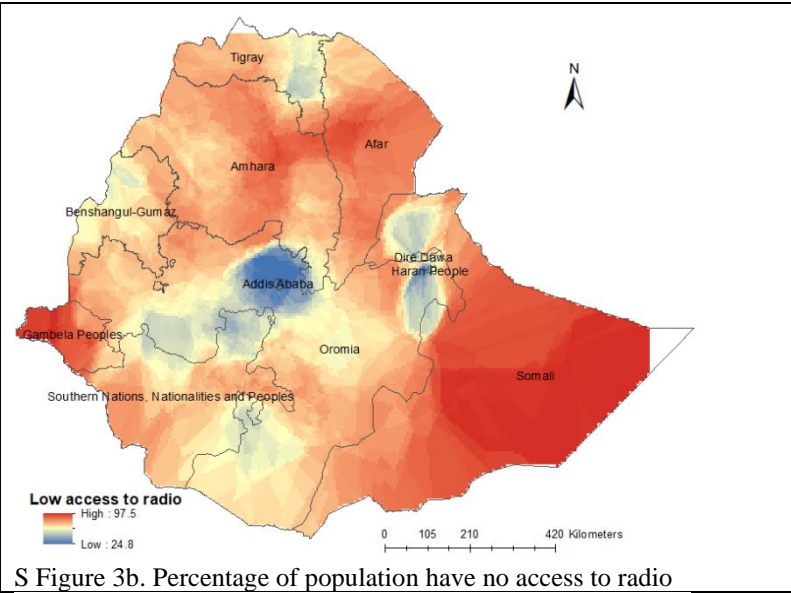

S Figure 3b. Percentage of population have no access to radio

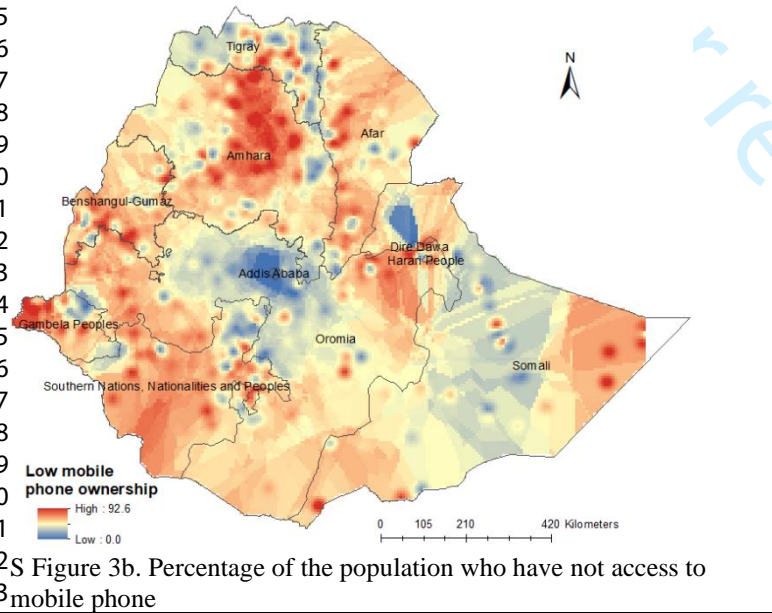

S Figure 3b. Percentage of the population who have not access to mobile phone

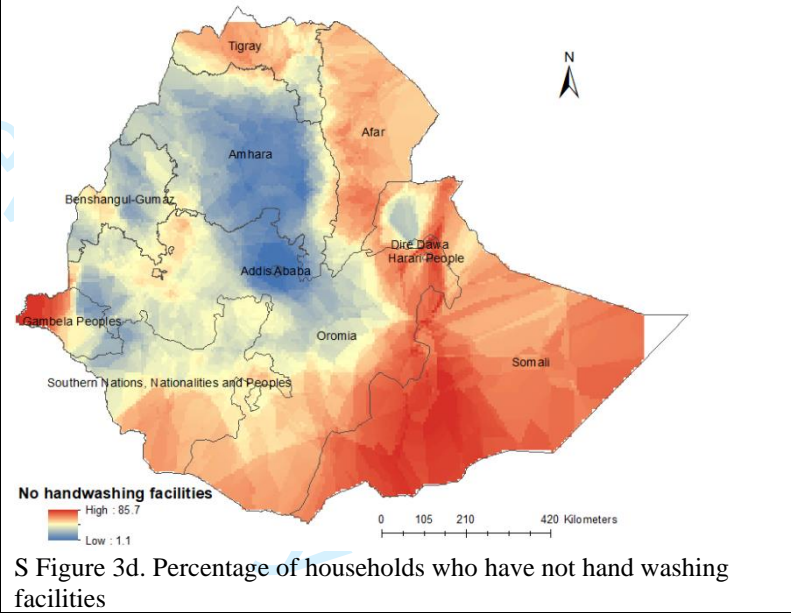

S Figure 3d. Percentage of households who have not hand washing facilities

# BMJ Open

## COVID-19 in Ethiopia: A geospatial analysis of vulnerability to infection, case severity, and death

|                               |                                                                                                                                                                                                                                                                                                                                                                                                                                                                                                                                                                                                                                                                                                                                                                                                                                                                                                                                                                                                                                                                                                                                                                                                                                                                                                                                                                                                                                                                                                                                                                                                                                                                                                                                                                                                                                                                                                                                                                                                                                                                                                                                                                                                                                                                                                                   |
|-------------------------------|-------------------------------------------------------------------------------------------------------------------------------------------------------------------------------------------------------------------------------------------------------------------------------------------------------------------------------------------------------------------------------------------------------------------------------------------------------------------------------------------------------------------------------------------------------------------------------------------------------------------------------------------------------------------------------------------------------------------------------------------------------------------------------------------------------------------------------------------------------------------------------------------------------------------------------------------------------------------------------------------------------------------------------------------------------------------------------------------------------------------------------------------------------------------------------------------------------------------------------------------------------------------------------------------------------------------------------------------------------------------------------------------------------------------------------------------------------------------------------------------------------------------------------------------------------------------------------------------------------------------------------------------------------------------------------------------------------------------------------------------------------------------------------------------------------------------------------------------------------------------------------------------------------------------------------------------------------------------------------------------------------------------------------------------------------------------------------------------------------------------------------------------------------------------------------------------------------------------------------------------------------------------------------------------------------------------|
| Journal:                      | <i>BMJ Open</i>                                                                                                                                                                                                                                                                                                                                                                                                                                                                                                                                                                                                                                                                                                                                                                                                                                                                                                                                                                                                                                                                                                                                                                                                                                                                                                                                                                                                                                                                                                                                                                                                                                                                                                                                                                                                                                                                                                                                                                                                                                                                                                                                                                                                                                                                                                   |
| Manuscript ID                 | bmjopen-2020-044606.R1                                                                                                                                                                                                                                                                                                                                                                                                                                                                                                                                                                                                                                                                                                                                                                                                                                                                                                                                                                                                                                                                                                                                                                                                                                                                                                                                                                                                                                                                                                                                                                                                                                                                                                                                                                                                                                                                                                                                                                                                                                                                                                                                                                                                                                                                                            |
| Article Type:                 | Original research                                                                                                                                                                                                                                                                                                                                                                                                                                                                                                                                                                                                                                                                                                                                                                                                                                                                                                                                                                                                                                                                                                                                                                                                                                                                                                                                                                                                                                                                                                                                                                                                                                                                                                                                                                                                                                                                                                                                                                                                                                                                                                                                                                                                                                                                                                 |
| Date Submitted by the Author: | 22-Dec-2020                                                                                                                                                                                                                                                                                                                                                                                                                                                                                                                                                                                                                                                                                                                                                                                                                                                                                                                                                                                                                                                                                                                                                                                                                                                                                                                                                                                                                                                                                                                                                                                                                                                                                                                                                                                                                                                                                                                                                                                                                                                                                                                                                                                                                                                                                                       |
| Complete List of Authors:     | <p>Alene, Kefyalew; Curtin University, Faculty of Health Sciences; Telethon Kids Institute, Wesfarmers Centre of Vaccines and Infectious Diseases<br/> Assefa, Yalemzewod; University of Gondar; University of New South Wales, School of Women's and Children's Health<br/> Fetene, Dagnachew ; Burnet Institute<br/> Koye, Digsu ; The University of Melbourne School of Population and Global Health<br/> Melaku, Yohannes Adama; Flinders University, Public Health; The University of Adelaide Adelaide Medical School<br/> Gesesew, Hailay; Mekelle University, Epidemiology Department, School of Health Sciences; Flinders University<br/> Birhanu, Mulugeta ; St Paul's Hospital Millennium Medical College<br/> Adane, Akilew; Telethon Kids Institute<br/> Muluneh, Muluken; Western Sydney University; Amref Health Africa in Ethiopia, Monitoring Evaluation and Research<br/> Dachew, Berihun; University of Gondar, Institute of Public Health; Curtin University, School of Public Health<br/> Abrha, Solomon; University of Canberra; Mekelle University, School of Pharmacy<br/> Aregay, Atsede; Monash University; Mekelle University, School of Nursing<br/> Ayele, Asnakew ; University of Gondar, School of Pharmacy; University of New England<br/> Bezabhe, Woldesellassie; University of Tasmania Faculty of Health<br/> Tadesse, Kidane ; Queensland University of Technology; Mekelle University, School of Public Health<br/> Gebremedhin, Tesfaye; University of Canberra<br/> Tesfay, Amanuel; Telethon Kids Institute, Wesfarmers Centre of Vaccines and Infectious Diseases; Curtin University, School of Public health<br/> Gebremichael, Lemlem; Mekelle University, Pharmacology Department; University of South Australia, School of Pharmacy and Medical Sciences, Therapeutics Research Centre<br/> Geleto, Ayele; Haramaya University; The University of Newcastle Faculty of Health and Medicine<br/> Kassahun, Habtamu ; Griffith University, Australian Rivers Institute<br/> Kibret, Getiye ; Debre Markos University, Public Health; The University of Sydney<br/> Leshargie, Cheru; Debre Markos University College of Health Science; University of Technology Sydney<br/> Mekonnen, Alemayehu; Deakin University; The University of Sydney, School of Pharmacy</p> |

|                                                    |                                                                                                                                                                                                                                                                                                                                                                                                                                                                                                                                                                                                                                                                                                                                                                          |
|----------------------------------------------------|--------------------------------------------------------------------------------------------------------------------------------------------------------------------------------------------------------------------------------------------------------------------------------------------------------------------------------------------------------------------------------------------------------------------------------------------------------------------------------------------------------------------------------------------------------------------------------------------------------------------------------------------------------------------------------------------------------------------------------------------------------------------------|
|                                                    | Mirkuzie, Alemnesh; Ethiopian Public Health Institute; University of Washington, Institute for Health Metrics and Evaluation<br>Mohammed, Hassen; The University of Adelaide; Women's and Children's Health Network<br>Tegegn, Henok; University of New England; University of Gondar<br>Gebresilassie, A; Mekelle University, Epidemiology; University of New South Wales, The George Institute for Global Health<br>Tesfay, Fisaha; Flinders University Faculty of Medicine Nursing and Health Sciences, South gate institute for Health, Society and Equity ; Mekelle University College of Health Sciences, School of Public Health<br>Wubishet, Befikadu ; University of Canberra<br>Kinfu, Yohannes; University of Canberra; Qatar University, College of Medicine |
| <b>&lt;b&gt;Primary Subject Heading&lt;/b&gt;:</b> | Epidemiology                                                                                                                                                                                                                                                                                                                                                                                                                                                                                                                                                                                                                                                                                                                                                             |
| <b>Secondary Subject Heading:</b>                  | Public health, Infectious diseases                                                                                                                                                                                                                                                                                                                                                                                                                                                                                                                                                                                                                                                                                                                                       |
| <b>Keywords:</b>                                   | Epidemiology < TROPICAL MEDICINE, Public health < INFECTIOUS DISEASES, PUBLIC HEALTH                                                                                                                                                                                                                                                                                                                                                                                                                                                                                                                                                                                                                                                                                     |
|                                                    |                                                                                                                                                                                                                                                                                                                                                                                                                                                                                                                                                                                                                                                                                                                                                                          |

SCHOLARONE™  
Manuscripts

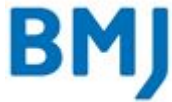

I, the Submitting Author has the right to grant and does grant on behalf of all authors of the Work (as defined in the below author licence), an exclusive licence and/or a non-exclusive licence for contributions from authors who are: i) UK Crown employees; ii) where BMJ has agreed a CC-BY licence shall apply, and/or iii) in accordance with the terms applicable for US Federal Government officers or employees acting as part of their official duties; on a worldwide, perpetual, irrevocable, royalty-free basis to BMJ Publishing Group Ltd ("BMJ") its licensees and where the relevant Journal is co-owned by BMJ to the co-owners of the Journal, to publish the Work in this journal and any other BMJ products and to exploit all rights, as set out in our [licence](#).

The Submitting Author accepts and understands that any supply made under these terms is made by BMJ to the Submitting Author unless you are acting as an employee on behalf of your employer or a postgraduate student of an affiliated institution which is paying any applicable article publishing charge ("APC") for Open Access articles. Where the Submitting Author wishes to make the Work available on an Open Access basis (and intends to pay the relevant APC), the terms of reuse of such Open Access shall be governed by a Creative Commons licence – details of these licences and which [Creative Commons](#) licence will apply to this Work are set out in our licence referred to above.

Other than as permitted in any relevant BMJ Author's Self Archiving Policies, I confirm this Work has not been accepted for publication elsewhere, is not being considered for publication elsewhere and does not duplicate material already published. I confirm all authors consent to publication of this Work and authorise the granting of this licence.

## 1 COVID-19 in Ethiopia: A geospatial analysis of vulnerability to infection, 2 case severity, and death

3 Kefyalew Addis Alene<sup>1,2,3\*</sup>, Yalemzewod Assefa Gelaw<sup>3,4+</sup>, Dagnachew Muluye Fetene<sup>5</sup>, Digsu N  
4 Koye<sup>6</sup>, Yohannes Adama Melaku<sup>7,8</sup>, Hailay Abrha Gesesew<sup>9,10</sup>, Mulugeta Molla Birhanu<sup>11</sup>, Akilew  
5 Awoke Adane<sup>12</sup>, Muluken Dessalegn Muluneh<sup>13,14</sup>, Berihun Assefa Dachew<sup>3,15</sup>, Solomon Abrha<sup>16,17</sup>,  
6 Atsede Aregay<sup>18,19</sup>, Asnakew Achaw Ayele<sup>20,21</sup>, Woldesellassie M Bezabhe<sup>22</sup>, Kidane Tadesse  
7 Gebremariam<sup>23,24</sup>, Tesfaye Gebremedhin<sup>25</sup>, Amanuel Tesfay<sup>15,2</sup>, Lemlem Gebremedhin  
8 Gebremichael<sup>26,27</sup>, Ayele Geleto<sup>28,29</sup>, Habtamu Tilahun Kassahun<sup>30</sup>, Getiye Dejen Kibret<sup>31,32</sup>, Cheru  
9 Tesema Leshargie<sup>33,34</sup>, Alemayehu Mekonnen<sup>35,36</sup>, Alemnesh H. Mirkuzie<sup>37,38,39</sup>, Hassen  
10 Mohammed<sup>40,41</sup>, Henok Getachew Tegegn<sup>21,42</sup>, Azeb Gebresilassie Tesema<sup>22,43</sup>, Fisaha Tesfay<sup>9,10,44</sup>,  
11 Befikadu L. Wubishet<sup>45</sup>, Yohannes Kinfu<sup>38,46,47,48+</sup>

13 <sup>1</sup>Faculty of Health Sciences, Curtin University, Western Australia, Australia

14 <sup>2</sup>Wesfarmers Centre of Vaccines and Infectious Diseases, Telethon Kids Institute, Perth, Western  
15 Australia, Australia

16 <sup>3</sup>Institute of Public Health, University of Gondar, Gondar, Ethiopia

17 <sup>4</sup>Population Child Health Research Group, School of Women's and Children's Health, University of  
18 New South Wales, Australia

19 <sup>5</sup>Burnet Institute, Melbourne, Victoria, Australia

20 <sup>6</sup>Centre for Epidemiology and Biostatistics, Melbourne School of Population and Global Health,  
21 University of Melbourne, Australia

22 <sup>7</sup>Adelaide Institute for Sleep Health, College of Medicine and Public health, Flinders University,  
23 Australia

24 <sup>8</sup>Adelaide Medical School, University of Adelaide, Australia

25 <sup>9</sup>College of Medicine and Public Health, Flinders University, Australia

26 <sup>10</sup>Epidemiology Department, School of Health Sciences, Mekelle University, Ethiopia

27 <sup>11</sup>Department of nursing, St. Paul's Hospital Millennium Medical College, Addis Ababa, Ethiopia

28 <sup>12</sup>Telethon Kids Institute, The University of Western Australia, Nedlands, Western  
29 Australia, Australia

30 <sup>13</sup>Amref Health Africa in Ethiopian, Monitoring Evaluation and Research, Addis Ababa, Ethiopia

31 <sup>14</sup>School of Nursing and Midwifery, Western Sydney University, Sydney Australia

32 <sup>15</sup>School of Public health, Curtin University, Western Australia, Australia

33 <sup>16</sup>Faculty of Health, University of Canberra, Bruce, Canberra, Australian Capital Territory, Australia.

34 <sup>17</sup>Department of Pharmaceutics, School of Pharmacy, College of Health Sciences, Mekelle University,  
35 Mekelle, Ethiopia

36 <sup>18</sup>School of Nursing and Midwifery, Monash University, Melbourne, Australia

37 <sup>19</sup>School of Nursing, Mekelle University, Ethiopia

38 <sup>20</sup>School of Health, Faculty of Medicine and Health, University of New England, Armidale 2351,  
39 Australia

40 <sup>21</sup>Department of Clinical Pharmacy, School of Pharmacy, College of Medicine and Health Science,  
41 University of Gondar, Gondar, Ethiopia

42 <sup>22</sup>School of pharmacy and pharmacology, University of Tasmania

43 <sup>23</sup>School of Exercise and Nutrition Sciences, Queensland University of Technology, Australia

44 <sup>24</sup>School of Public Health, Mekelle University, Ethiopia

45 <sup>25</sup>Faculty of Business, Government and Law, University of Canberra

46 <sup>26</sup>School of Pharmacy and Medical Sciences, Therapeutics Research Centre, University of South  
47 Australia, Adelaide, Australia

48 <sup>27</sup>School of Pharmacy, Pharmacology Department, Mekelle University, Mekelle, Ethiopia

49 <sup>28</sup>School of Public Health, College of Health and Medical Sciences, Haramaya University, Ethiopia

- 1  
2  
3 50 <sup>29</sup>School of Medicine and Public Health, Faculty of Health and Medicine, the University of  
4 51 Newcastle, Australia  
5 52 <sup>30</sup>Australian Rivers Institute, Griffith University, Nathan, Australia  
6  
7 53 <sup>31</sup>Debre Markos University, Ethiopia  
8 54 <sup>32</sup>University of Sydney, Australia  
9 55 <sup>33</sup>School of Public Health, Faculty of Health, University of Technology Sydney, Ultimo, Australia  
10 56 <sup>34</sup>College of Health Sciences, Debre Markos University, Debre Markos, Ethiopia  
11 57 <sup>35</sup>Institute for Health Transformation, Deakin University, Australia,  
12 58 <sup>36</sup>School of Pharmacy, University of Sydney, Sydney, Australia  
13 59 <sup>37</sup>Ethiopian Public Health Institute, Addis Ababa, Ethiopia  
14 60 <sup>38</sup>Institute for Health Metrics and Evaluation, University of Washington, Seattle, USA  
15 61 <sup>49</sup>Center for International Health, University of Bergen, Bergen, Norway  
16 62 <sup>40</sup>Vaccinology and Immunology Research Trials Unit, Women's and Children's Health Network,  
17 63 Adelaide, South Australia, Australia  
18 64 <sup>41</sup>Robinson Research Institute, University of Adelaide, Adelaide, South Australia, Australia  
19 65 <sup>42</sup>School of Rural Medicine, University of New England, Armidale, Australia  
20 66 <sup>43</sup>The George Institute for Global Health, University of New South Wales, Australia, Sydney  
21 67 <sup>44</sup>School of Health and Social Development, Deakin University  
22 68 <sup>45</sup>Research Centre for Generational Health and Ageing, University of Newcastle, Australia  
23 69 <sup>46</sup>Faculty of Health, University of Canberra, Australia  
24 70 <sup>47</sup>College of Medicine, Qatar University, Qatar  
25 71 <sup>48</sup>Murdoch Children's Research Institute, Royal Children's Hospital, Melbourne, Australia  
26  
27  
28  
29

30 73 **\*Corresponding Author:** Kefyalew Addis Alene, Faculty of Health Sciences, Curtin  
31 74 University, Western Australia, Australia, Kent St, Bentley WA 6102, Australia. Tel:  
32 75 +61404705064; E-mail: kefyalew.alene@anu.edu.au  
33  
34

35 76

36  
37 77 <sup>+</sup>Equal contributor  
38 78  
39  
40 79  
41  
42 80  
43  
44 81  
45  
46 82  
47  
48 83  
49  
50 84  
51  
52  
53

54 85 **Keywords:** Risk map, vulnerability, infection, severity, death, COVID-19, Ethiopia, geospatial  
55  
56  
57 86  
58  
59 87  
60

1  
2  
3 88 **Abstract**  
4  
5

6 89 **Background:** COVID-19 has caused a global public health crisis affecting most countries,  
7  
8 90 including Ethiopia, in various ways. This study maps the vulnerability to infection, case  
9  
10 91 severity, and likelihood of death from COVID-19 in Ethiopia.  
11

12  
13 92 **Methods:** Thirty-eight potential indicators of vulnerability to COVID-19 infection, case  
14  
15 93 severity and likelihood of death, identified based on a literature review and the availability of  
16  
17 94 nationally representative data at a low geographic scale, were assembled from multiple sources  
18  
19 95 for geospatial analysis. Geospatial analysis techniques were applied to produce maps showing  
20  
21 96 the vulnerability to infection, case severity, and likelihood of death in Ethiopia at a spatial  
22  
23 97 resolution of 1 km X 1 km.  
24

25 98 **Results:** This study showed that vulnerability to COVID-19 infection is likely to be high  
26  
27 99 across most parts of Ethiopia, particularly in the Somali, Afar, Amhara, Oromia, and Tigray  
28  
29 100 regions. The number of severe cases of COVID-19 infection requiring hospitalisation and  
30  
31 101 intensive care unit admission is likely to be high across Amhara, most parts of Oromia and  
32  
33 102 some parts of the Southern Nations, Nationalities, and Peoples' Region. The risk of COVID-  
34  
35 103 19-related death is high in the country's border regions, where public health preparedness for  
36  
37 104 responding to COVID-19 is limited.  
38

39 105 **Conclusion:** This study revealed geographical differences in vulnerability to infection, case  
40  
41 106 severity, and likelihood of death from COVID-19 in Ethiopia. The study offers maps that can  
42  
43 107 guide the targeted interventions necessary to contain the spread of COVID-19 in Ethiopia.  
44  
45 108  
46  
47 109  
48  
49 110  
50  
51 111  
52  
53 112  
54  
55 113  
56  
57  
58  
59  
60



1  
2  
3 114  
4  
5**Strengths and limitations of this study**

- This is the first study that maps vulnerability to COVID-19 infection, severe cases, and associated death in Ethiopia at a high level of resolution across the entire territory of Ethiopia.
- This is also the first study that has attempted to present the degree of service preparedness for COVID-19 across the country.
- The study incorporated a wide range of indicators from multiple sources and applied rigorous geospatial techniques to provide the best possible prediction maps.
- However, some important indicators such as psychosocial and clinical factors were not captured in our modelling due to the lack of geocoded data.

6  
7  
8  
9  
10  
11  
12  
13  
14  
15  
16  
17  
18  
19  
20  
21  
22  
23 115  
24  
25  
26 116  
27  
28  
29 117  
30  
31  
32 118  
33  
34  
35 119  
36  
37  
38 120  
39  
40  
41 121  
42  
43  
44 122  
45  
46  
47 123  
48  
49  
50 124  
51  
52  
53 125  
54  
55  
56 126  
57  
58  
59 127  
60

## 128 **Introduction**

129 Coronavirus disease (COVID-19) has become one of the most serious global public health  
130 crises in modern times <sup>1</sup>. The disease was declared a pandemic on 11 March 2020 and has  
131 currently affected more than 216 countries and territories <sup>2</sup>. As of 3 August 2020, there were  
132 more than 17.6 million confirmed COVID-19 cases and over 680,000 associated deaths around  
133 the globe <sup>3</sup>. The highest numbers of cases and deaths have been reported from the USA, Brazil,  
134 India, and some European countries, such as Russia, the United Kingdom, Italy, and Spain <sup>3</sup>.  
135 African countries, including Ethiopia, have reported a low number of COVID-19, although the  
136 number of cases and deaths are currently on the rise <sup>4</sup>. In Ethiopia, the first case of COVID-19  
137 was reported on 13 March 2020 in Addis Ababa, but at the time of this study almost all regions  
138 of the country were affected at varying levels <sup>5</sup>. However, number of cases in the country are  
139 still very low due to limited testing capacity and delays in reporting confirmed cases.

140 Multiple factors, such as socio-demographic, connectivity, behavioural, climatic, and  
141 comorbidity factors, are strong predictors of the differences in transmission, hospitalisation,  
142 and mortality rates among and within countries <sup>6,7</sup>. Studies conducted in Africa have provided  
143 limited information on the vulnerability of different areas to COVID-19 infection <sup>4,8</sup>. These  
144 studies have been conducted at the country level using a limited number of indicators <sup>4,8</sup>.  
145 Mapping the risks of COVID-19 (infection, case severity, service preparedness and death) at  
146 the lowest administrative unit, such as the district is important in many ways. First, the  
147 generated evidence can help the government and community better prepare and respond to the  
148 health- and non-health-related impacts of COVID-19 according to their contextual  
149 circumstances. Second, it can help the relevant bodies determine effective and efficient  
150 resource-mobilisation efforts, such as providing training for health care workers, supplying  
151 hospitals with necessary equipment, prioritising testing practices, and distributing hand  
152 sanitizer and protective facemasks. Third, the information can be utilised as a guide for  
153 designing targeted travel restrictions or applying full or partial lockdowns as needed. Fourth,  
154 the evidence can stimulate further study on COVID-19 in the country.

155 Given Ethiopia's large population size, variation in resources and vast geographic size, the risk  
156 of COVID-19 infection, case severity and likelihood of death are likely to differ across regions,  
157 zones, and districts, suggesting that local and context-specific interventions be implemented.  
158 Therefore, this study aimed to map the vulnerability to infection, case severity, and likelihood  
159 of death from COVID-19 in Ethiopia using rigorous state-of-the-art geospatial techniques.

## 160 **Methods**

### 161 **Study area**

162 This study focused on Ethiopia, the second-most populous country in Africa, with an estimated  
163 population size of more than 115 million <sup>9</sup>. Ethiopia has a total area of approximately 1.1  
164 million square kilometres, making it the 10<sup>th</sup> largest country in Africa and the 27<sup>th</sup> largest in  
165 the world. The country has a tiered administrative system consisting of regional states (first  
166 level), zones (second level), woredas or districts (third level), and kebeles or neighbourhoods  
167 (fourth level) <sup>10</sup>. There are nine administrative regional states in Ethiopia, including Tigray,  
168 Afar, Amhara, Oromia, Somali, Benishangul-Gumuz, Harari, Gambella, and the Southern  
169 Nations, Nationalities, and Peoples' Region (SNNPR), and two administrative cities (Addis  
170 Ababa and Diredawa). Four of these regional states (namely, Afar, Somali, Benishangul-  
171 Gumuz, and Gambella) are relatively less developed, and categorised as developing regional  
172 states. They lag behind the rest of the country in all indicators related to human development  
173 and disease prevention and control programs. The administrative units of Ethiopia (shapefiles)  
174 were obtained from the Database for Global Administrative Areas <sup>11</sup>.

### 175 **Data sources and variable selection**

176 The data for this study were assembled from multiple sources (Table 1). Potential indicators  
177 were selected based on evidence of association with COVID-19 infection, case severity, and  
178 death based on a literature review and the availability of country-wide representative data at a  
179 district geographic scale or lower (Figure 1). Table 2 presents the evidence for the association  
180 between indicators and COVID-19, as well as the rationale for selecting these indicators for  
181 the study.

182 The following area-level demographic and socio-economic indicators were used as indicators  
183 of COVID-19 infection and case severity: the average number of persons per household, the  
184 proportion of the population aged  $\geq 65$  years, the proportion of males, and the number of  
185 households in the lowest wealth quintile. All of these socio-economic and demographic  
186 indicators were obtained from the latest Ethiopia Demographic and Health Survey (EDHS) <sup>12</sup>.  
187 A map showing the distribution of EDHS datapoints are available as supplementary  
188 information (Supplemental Figure 1). Population density, estimated as the number of people  
189 per grid, was obtained from WorldPop <sup>13</sup>.

190 Connectivity indicators, which measure the population-level vulnerability to infection, were  
191 also captured using distance and time-bounded markers. Specifically, average travel time

1  
2  
3 192 (measured in minutes) to the nearest city and proximity to international borders (measured in  
4 193 kilometres) were included to measure each area's level of susceptibility to infection. Data on  
5 194 travel time to the nearest city, obtained from the University of Oxford's Malaria Atlas Project  
6 195 (MAP), were used to quantify the accessibility of an area to high-density urban centres at a  
7 196 resolution of 1 km×1 km<sup>14</sup>. Data on proximity to international borders were obtained from the  
8 197 EDHS spatial data repository and were used to measure<sup>15</sup> the geodesic distance to the nearest  
9 198 international border in kilometres, indicating the risk of cross-border transmission and the  
10 199 spread of COVID-19. Infection rates and the spread of COVID-19 were also positively  
11 200 correlated with the per capita public transportation use rate<sup>16</sup>. Thus, to determine the nearest  
12 201 cross-country road to each location on the map, we obtained and applied data for major roads  
13 202 from the World Bank<sup>17</sup>.

23 203 It is evident that inadequate knowledge about COVID-19 and a lack of awareness of prevention  
24 204 measures exacerbate community transmission of the disease<sup>18</sup>. Therefore, we extracted data  
25 205 on adult literacy rate, access to media (such as radio, television, and mobile phone messages)  
26 206 and knowledge about other infectious diseases (e.g., HIV) from the EDHS as proxies for  
27 207 knowledge of COVID-19 prevention measures in each area of the country<sup>12</sup>. According to the  
28 208 WHO, maintaining good hand hygiene through regular washing with soap and water is one of  
29 209 the most effective preventative measures for reducing the transmission of COVID-19<sup>19,20</sup>.  
30 210 Using the same data as above, we also assessed hand hygiene practices, access to water, and  
31 211 the availability of handwashing stations in a household.

39 212 Previous studies have shown that underlying chronic comorbidities and behavioural factors  
40 213 such as cigarette, alcohol and khat consumption were associated with more severe COVID-19  
41 214 infections<sup>21,22</sup>. Data on khat chewing and the alcohol consumption rate were obtained from the  
42 215 EDHS 2016<sup>12</sup>, and data on cigarette smoking were obtained from the Ethiopia Public Health  
43 216 Institute STEP wise approach to Surveillance (STEPS) study<sup>23</sup>. The STEP survey was also  
44 217 used to measure the prevalence of selected non-communicable diseases (NCDs) such as  
45 218 hypertension, heart disease, and diabetes mellitus (DM).

52 219 The level of preparedness and readiness of health facilities to detect, manage, and control the  
53 220 COVID-19 pandemic at a given location was measured using data from the Service Availability  
54 221 and Readiness Assessment (SARA) survey<sup>24</sup>. For each geo-location, the obtained measures  
55 222 include the availability and readiness of facilities in terms of basic amenities and equipment,  
56 223 standard precautions, diagnostic capacities, and essential medicines. In addition, data on  
57  
58  
59  
60

224 service readiness for specific diseases such as DM, chronic respiratory disease (CRD), and  
225 tuberculosis (TB), as well as the availability of intensive care units (ICUs) and laboratory  
226 facilities, were obtained from this same survey. To augment the health facility data, we  
227 extracted population-level indicators on health care access and barriers to care from EDHS  
228 2016 <sup>12</sup>.

229 Finally, climatic data (temperature, precipitation, humidity, and sunlight exposure) were  
230 obtained from the WorldClim v2.0 Global Climate Database <sup>25</sup>. These data were extracted at a  
231 spatial resolution of 30 seconds or ~1 km<sup>2</sup> and were considered indicators of COVID-19  
232 infection in this study.

### 233 **Geospatial data processing**

234 All data were georeferenced using a geographical information system, ArcGIS 10.6.1 software  
235 (ESRI Inc., Redlands CA, USA). The ideal resolution for spatial analysis was a latitude and  
236 longitude point that represented the location of the data cluster (point-level data), but when  
237 these were not available, we geolocated the available data to the smallest geographical areal  
238 unit, typically representing an administrative unit such as village or districts. In instances when  
239 the latitude and longitude coordinates of the village or district were not available in the dataset,  
240 centroids of the village or districts were also identified using Google Maps. A very small  
241 rectangular polygon (fishnet) with its centroid (fishnet centroid) covering the whole territory  
242 of Ethiopia was created using a sampling tool under the data management tools in the  
243 ArcToolbox (Figure 2). The fishnet centroid contained a unique identification number and was  
244 used as a common georeferenced system to process, join, and extract the raster and vector data  
245 collected from various sources. All vector data (point, polygon, and line) were converted to  
246 raster data using geostatistical methods <sup>26</sup>. Raster grids were then resampled to the common  
247 georeferenced system at a spatial resolution of 1 km x 1 km. Finally, a raster mask covering  
248 the entire country was created by clipping smaller spatial units from a large global raster data  
249 source.

### 250 **Statistical analyses**

251 Geostatistical techniques such as spatial autocorrelation, kriging and semivariograms were  
252 applied to create a prediction grid surface from a scattered set of points <sup>27</sup>. Kriging assumes  
253 that the distance or direction between sample points reflects a spatial correlation that can be  
254 used to explain variation in the surface <sup>28</sup>. Since the variables had different units of  
255 measurement, the datasets were normalised using a min-max approach to a standard scale  
256 ranging from 0 (the lowest risk) to 100 (the highest risk) <sup>29</sup>. After normalisation, the indicators

1  
2  
3 257 were averaged to create a vulnerability index, measuring the risk of COVID-19 for each geo-  
4  
5 258 location<sup>30</sup>. The vulnerability indices were calculated separately for each domain, namely, the  
6  
7 259 vulnerability to infection, case severity, and likelihood of death from COVID-19. The three  
8  
9 260 domains were then averaged to produce the overall COVID-19 vulnerability index. Given that  
10  
11 261 COVID-19 is a new virus, there is a lack of evidence for assigning weights for each indicator.  
12  
13 262 Hence, equal weight was given to all indicators when calculating the arithmetic mean for the  
14  
15 263 vulnerability indices. However, we also used principal component analysis (PCA) and  
16  
17 264 geometric mean methods, which produced broadly similar results (Supplemental Figure 2 and  
18  
19 265 Supplemental Figure 3). The risk maps were then created separately for infection, case severity,  
20  
21 266 service preparedness, and death from the composite index using geostatistical tools in ArcGIS.  
22  
23 267 All data transformations were performed in R<sup>31</sup>. All items included in this study are available  
24  
25 268 in the STROBE (Strengthening the Reporting of Observational Studies in Epidemiology)  
26  
27 269 Statement checklist (Supplemental Table 1).

26  
27 270 **Ethics aspects:** Ethical approval was not required for this study as it was based on publicly  
28  
29 271 available data.

30  
31 272 **Patient and public involvement:** This research was done without patient and public  
32  
33 273 involvement.

34  
35 274 **Funding:** There was no funding source for this study.

## 36 37 38 275 **Results**

### 39 40 276 **Vulnerability to COVID-19 infection**

41  
42 277 Figure 3 shows the vulnerability map of COVID-19 infection in Ethiopia. The map highlights  
43  
44 278 that most parts of the country are likely to have a relatively high vulnerability and be at  
45  
46 279 substantial risk for COVID-19 infection. Most parts of the country are identified as vulnerable  
47  
48 280 to COVID-19 infection, with the exception of Addis Ababa and the north-western Somali  
49  
50 281 region. The peripheral areas of the country bordering Djibouti, Somalia, Eritrea, and South  
51  
52 282 Sudan appeared to be vulnerable to COVID-19 infection. These outlying areas are  
53  
54 283 characterised by a low level of geographical connectivity and low scores for disease  
55  
56 284 knowledge, hand hygiene and socio-economic indices (Supplemental Figure 4). They also have  
57  
58 285 certain climatic factors that were found to be important indicators of COVID-19 transmission.

### 58 59 286 **Vulnerability to severe cases of COVID-19 infection**

60

287 Areas across the Amhara region and most parts of the Oromia region are likely to experience  
288 severe forms of COVID-19 that require hospitalisation and ICU admission. Some parts of the  
289 SNNPR are also expected to be at high risk of severe COVID-19 infections. The combination  
290 of demographic (high proportion of older adults), comorbidity (high prevalence of  
291 hypertension, DM, obesity, HIV, and TB), and behavioural and economic indicators (high  
292 proportion of smokers and high level of alcohol and khat consumption, interior cooking, and  
293 solid fuel use) renders these parts of the country at a higher risk of severe forms of COVID-19.  
294 Figure 4 shows the levels of vulnerability to severe forms of COVID-19.

### 295 **Vulnerability to death from COVID-19**

296 People living around border areas in Ethiopia are at a high risk for COVID-19-related death,  
297 as illustrated in Figure 5. Districts and zones in the Benishangul-Gumuz, Gambela, Afar,  
298 SNNPR, Dire Dawa, Southwest Somali, Northwest Amhara, Western Tigray, and Western and  
299 Eastern Oromia regions are at high risk for COVID-19-related death. The level of service  
300 preparedness and readiness to mitigate the health effects of COVID-19 appear to be very low  
301 in these regions (Figure 6). Ethiopia's border regions have inadequate ICU availability and  
302 laboratory capacity as well as limited health care access. They also have low general and  
303 service-specific readiness, as shown in Figure 6.

## 304 **Discussion**

305 This is the first study that maps vulnerability to COVID-19 infection, severe cases, and  
306 associated death in Ethiopia at a high resolution. This is also the first study that has attempted  
307 to present the degree of service preparedness for COVID-19 across the country.

308 We found that most parts of the country are vulnerable to COVID-19 infections, and the  
309 greatest burden might be outside of Addis Ababa. It is likely that compared to other regions, a  
310 higher proportion of people from the Amhara and Oromia regions, the two most populous  
311 regions of the country, will develop severe forms of COVID-19 leading to hospitalisation and  
312 ICU admission. Border areas of the country are also expected to face a higher risk of death than  
313 areas located in the central regions. The findings of this study are of paramount importance in  
314 preventing and controlling COVID-19 transmission and in designing targeted interventions,  
315 such as enacting travel restrictions, distributing preventative masks and determining which  
316 areas to prioritise if a COVID-19 vaccine becomes available. As some of these areas also have  
317 lower preparedness scores and low general and service-specific readiness scores, the findings

1  
2  
3 318 have wider implications for allocating resources and strengthening the health care system after  
4 319 the COVID-19 pandemic.

7 320 Despite the disproportionately high infection rate in Addis Ababa at present (Supplemental  
8 321 Figure 5), we found that the risk of COVID-19 infection is likely to become rather high in other  
9 322 regions. The high infection rate in Addis Ababa at this initial stage is expected, given that Addis  
10 323 Ababa is a major travel hub and Bole International Airport, located in the city, is one of the  
11 324 largest international airports in Africa. This exposes the city to a higher risk of imported cases  
12 325 and, subsequently, to an early surge of infections, leaving the areas outside the city at a higher  
13 326 risk of later infection. Second, we considered multifaceted risk factors (indicators) for COVID-  
14 327 19 infection in our geospatial model. This means that although the city has a high degree of  
15 328 connectivity, it is also characterised by higher scores for information penetration, knowledge  
16 329 of disease prevention and hand hygiene practices that could help slow the rate of infection in  
17 330 the city<sup>12</sup>. Third, Addis Ababa has relatively better and more consistent test-and-contact tracing  
18 331 practices than in other parts of the country, which means that the chance of new infections  
19 332 being detected in the city are much greater than in other parts of the country<sup>5</sup>. Future efforts to  
20 333 expand testing and tracing practices in other areas of the county are likely to increase the extent  
21 334 of confirmed infections in those other areas. Recent studies have demonstrated that effective  
22 335 social distancing and contact tracing can significantly reduce the rate of infection<sup>32,33</sup>. These  
23 336 interventions should be strengthened and expanded to areas identified as high risk in this study.

24 337 Our study also showed that the risk for severe cases of COVID-19 infection is high in most  
25 338 parts of the Amhara and Oromia regions. This may be due to the high prevalence of NCDs,  
26 339 which are associated with severe cases of COVID-19. Previous studies have revealed that the  
27 340 burden of NCDs, such as DM and hypertension, is high in these two regions<sup>23,34,35</sup>.

28 341 Our study also revealed that peripheral areas sharing international borders are likely to see a  
29 342 greater number of COVID-19-related deaths. The high risk of death along the border areas  
30 343 might be attributed to low preparedness in case management and weak health care systems. In  
31 344 contrast, although the Amhara and Oromia regions may have more severe cases, the  
32 345 preparedness indicators show that the regions are better equipped to cope with these anticipated  
33 346 severe cases. However, our study suggests that additional preparation and capacity  
34 347 strengthening are needed mainly in the following areas: emergency response systems, case  
35 348 detection and capacity to care for patients. It is also equally important that hospitals have  
36 349 adequate supplies, health care personnel and life-saving medical intervention resources.



1  
2  
3 350 Despite encouraging efforts by the Ethiopian government and stakeholders to prepare the  
4  
5 351 health care system for the pandemic, the existing health care services in the country may face  
6  
7 352 unprecedented challenges and crises due to the surge of patients that will require hospitalisation  
8  
9 353 and ICU services at the same time. This can, however, be eased by implementing public health  
10  
11 354 and social measures at the individual, community, and public authority levels to prevent  
12  
13 355 infections and subsequent health, economic, and social consequences <sup>36</sup>. Studies have shown  
14  
15 356 that implementing non-pharmaceutical interventions such as physical distancing, mask use, and  
16  
17 357 closure of schools, especially during the early stages of infection, can reduce transmission and  
18  
19 358 subsequent potential public health and economic crises <sup>37</sup>.

20  
21 359 Further, we found notable regional disparities in health system preparedness and readiness  
22  
23 360 levels in the country. This is important because if the health care system is well equipped to  
24  
25 361 prevent and mitigate the spread of the pandemic, then the mortality rate from the disease can  
26  
27 362 be markedly reduced <sup>38</sup>. However, we observed that Ethiopia's border regions (i.e.,  
28  
29 363 Benishangul-Gumuz, Gambella, Afar, and Somali) have low preparedness levels.  
30  
31 364 Nevertheless, comparisons between the border regions and other regions of the country need  
32  
33 365 to be treated with care because Ethiopia in general has very low doctor-to-resident (1 doctor  
34  
35 366 per 10,000 people) and hospital bed-to-population (3 hospital beds per 10,000 people) ratios  
36  
37 367 <sup>39</sup>. Several long-, medium- and short-term strategies, can be implemented to mitigate these  
38  
39 368 problems: (i) providing short-term training for potential actors such as community leaders,  
40  
41 369 students, and traditional and modern medical practitioners, (ii) recruiting additional staff to  
42  
43 370 work in COVID-19-related health care, (iii) establishing COVID-19 clinics and changing  
44  
45 371 outpatient rooms to emergency clinics, (iv) collaborating with private hospitals ahead of surges  
46  
47 372 so that they can be used in the case such surges occur, and (v) establishing mobile clinics and  
48  
49 373 temporary admission rooms in highly vulnerable areas.

#### 46 374 **Strength and Limitations**

48 375 This study has several strengths. First, the current study was conducted at a spatial resolution  
49  
50 376 of 1 km x 1 km across the entire territory of Ethiopia. Second, it incorporated a wide range of  
51  
52 377 indicators from multiple sources. Third, it applied rigorous geospatial techniques, including  
53  
54 378 spatial autocorrelation, kriging and semivariograms, to provide the best possible prediction  
55  
56 379 maps. Finally, we produced vulnerability mapping for infection or transmission, case severity,  
57  
58 380 and associated death separately to assist with policy interventions related to each risk.

1  
2  
3 381 However, it is important to note some potential limitations of the study when interpreting the  
4  
5 382 findings. First, the results need constant updating, as some of the variables used in the study  
6  
7 383 may change overtime. Second, the data used in this study were not collected in the same year  
8  
9 384 and the results might be changed if recently available data used in the analysis. However, many  
10  
11 385 of the variables used in this study were static and may not change over time. Moreover, we  
12  
13 386 used the most recently available data for non-static variables such as EDHS data. Third,  
14  
15 387 ongoing political turmoil in the country means that the dynamics of transmission may change  
16  
17 388 depending on the location and severity of these incidents. For example, in areas of low security  
18  
19 389 resulting from active conflict, the local health systems might be ill-prepared to prevent and  
20  
21 390 control COVID-19. Insecurity also may generate unpredictable population movements, and  
22  
23 391 this in turn could exacerbate infection dynamics in the country. Fourth, the calculation of the  
24  
25 392 composite risk factor index was based on an unweighted average under the assumption that all  
26  
27 393 indicators have equal importance, which may or may not be the case. Some of the variables  
28  
29 394 included in our score may have greater effects on vulnerability to infection, case severity, and  
30  
31 395 likelihood of death than others. Giving equal weight for all these variables may influence the  
32  
33 396 findings of our study, but the exact effect is hard to tell. However, we have calculated a  
34  
35 397 weighted index using PCA as an alternative method, which produced broadly similar results  
36  
37 398 (Supplemental Figure 2 and Supplemental Figure 3). Last, some important indicators, such as  
38  
39 399 psychosocial and clinical factors (e.g., mental illness, quality of life, and social support), were  
40  
41 400 not captured in our modelling due to the lack of geocoded data.

## 401 **Conclusions**

402 Although nearly three-quarters of the current COVID-19 cases reported in Ethiopia are  
403 concentrated in and around Addis Ababa, this study predicts that over time, the risk of COVID-  
404 19 infection will be higher across most other parts of the country. A higher proportion of people  
405 from the Amhara region, most of the Oromia region, and some parts of the SNNPR will develop  
406 severe cases of infection. Additionally, the risk of death will be higher in the regions of the  
407 country with low preparedness scores for COVID response. Hence, the preventative and  
408 control measures that are currently in place in the capital city should be strengthened and  
409 extended to regional areas, especially to high-risk areas, to prevent and mitigate the risk of  
410 COVID-19 infection, lower the number of severe cases, and limit the number of associated  
411 deaths in Ethiopia.

## 412 **Declaration**

## 413 **Authors' contributions**

414 KAA, YAG, YK, DMF, DNK, YAM, HAG, MB, MDM, AAA, and BAD conceptualised the  
415 study. KAA designed and run the geospatial analysis. YAG involved in the data analysis. KAA,  
416 YAG, DMF, DNK, and YAM drafted the manuscript. HAG, MB, AAA<sub>1</sub>, MDM, BAD, SA,  
417 AA, AAA<sub>2</sub>, WMB, KTG, TG, ATG, LGG, AG, HTK, GDK, CTL, LBM, AAM, HM, HGT,  
418 AGT, FT, BLW, and YK Critically reviewed and revised the drafted manuscript. KAA, YK,  
419 and AHM were responsible for quality control of accuracy and integrity of data. All the authors  
420 interpreted the data. All authors contributed to the final draft and finally approved it to be  
421 published. All authors agreed to be accountable for all aspects of the work for any issue related  
422 to the accuracy or integrity of any part of the work. The corresponding author attests that all  
423 listed authors meet authorship criteria and that no others meeting the criteria have been omitted.

424 **Funding:** There is no funding source for this study.

425 **Competing interests:** None declared.

426 **Patient and public involvement:** This research was done without patient and public  
427 involvement.

428 **Data availability statement:** Extra data is available by emailing the corresponding author  
429 (KAA): kefyalew.alene@curtin.edu.au

## 430 **References**

- 431 1. Yang P, Wang X. COVID-19: a new challenge for human beings. *Cellular &*  
432 *molecular immunology* 2020; **17**(5): 555-7.
- 433 2. Cucinotta D, Vanelli M. WHO declares COVID-19 a pandemic. *Acta bio-medica:*  
434 *Atenei Parmensis* 2020; **91**(1): 157-60.
- 435 3. WHO. Coronavirus disease ( COVID-19): situation report, 195. 2020.
- 436 4. Gilbert M, Pullano G, Pinotti F, et al. Preparedness and vulnerability of African  
437 countries against importations of COVID-19: a modelling study. *The Lancet* 2020;  
438 **395**(10227): 871-7.
- 439 5. Baye K. COVID-19 prevention measures in Ethiopia: Current realities and prospects:  
440 Intl Food Policy Res Inst; 2020.
- 441 6. Ji Y, Ma Z, Peppelenbosch MP, Pan Q. Potential association between COVID-19  
442 mortality and health-care resource availability. *The Lancet Global Health* 2020; **8**(4): e480.
- 443 7. Mehra MR, Desai SS, Kuy S, Henry TD, Patel AN. Cardiovascular disease, drug  
444 therapy, and mortality in COVID-19. *New England Journal of Medicine* 2020.
- 445 8. ACSS. Mapping Risk Factors for the Spread of COVID-19 in Africa: Africa Center  
446 for Strategic Studies, 2020.
- 447 9. UN. Department of Economic and Social Affairs. Population Division, 2019.
- 448 10. Workie NW, Ramana GN. The health extension program in Ethiopia. 2013.

11. Areas GA. GADM database of global administrative areas. *Global Administrative Areas* 2012.
12. CSA. Ethiopia Demographic and Health Survey 2016. Addis Ababa, Ethiopia, and Rockville, Maryland, USA, 2016.
13. Tatem AJ. WorldPop, open data for spatial demography. *Scientific data* 2017; **4**(1): 1-4.
14. Weiss DJ, Nelson A, Gibson H, et al. A global map of travel time to cities to assess inequalities in accessibility in 2015. *Nature* 2018; **553**(7688): 333-6.
15. ICF. The DHS Program Spatial Data Repository. 2018.
16. Ayenew B, Yitayew M, Pandey D. Challenges and opportunities to tackle COVID-19 spread in Ethiopia. *Journal of Peer Science* 2020; **2**(2).
17. Bank W. Ethiopia Roads. 2014.
18. Zhong B-L, Luo W, Li H-M, et al. Knowledge, attitudes, and practices towards COVID-19 among Chinese residents during the rapid rise period of the COVID-19 outbreak: a quick online cross-sectional survey. *International journal of biological sciences* 2020; **16**(10): 1745.
19. Anderson RM, Heesterbeek H, Klinkenberg D, Hollingsworth TD. How will country-based mitigation measures influence the course of the COVID-19 epidemic? *The Lancet* 2020; **395**(10228): 931-4.
20. Xiao Y, Torok ME. Taking the right measures to control COVID-19. *The Lancet Infectious Diseases* 2020; **20**(5): 523-4.
21. Testino G. Are patients with alcohol use disorders at increased risk for Covid-19 infection? *Alcohol and Alcoholism (Oxford, Oxfordshire)* 2020.
22. Zheng Z, Peng F, Xu B, et al. Risk factors of critical & mortal COVID-19 cases: A systematic literature review and meta-analysis. *Journal of Infection* 2020.
23. EPHI. Ethiopia STEPS report on risk factors for chronic non-communicable diseases and prevalence of selected NCDS. Addis Ababa, 2016.
24. EPHI. Ethiopia Service Availability and Readiness Assessment (SARA) Final Report. Addis Ababa, 2018.
25. Fick SE, Hijmans RJ. WorldClim 2: new 1-km spatial resolution climate surfaces for global land areas. *International journal of climatology* 2017; **37**(12): 4302-15.
26. Burrough P. GIS and geostatistics: Essential partners for spatial analysis. *Environmental and ecological statistics* 2001; **8**(4): 361-77.
27. Childs C. Interpolating surfaces in ArcGIS spatial analyst. *ArcUser, July-September* 2004; **3235**(569): 32-5.
28. Negreiros J, Painho M, Aguilar F, Aguilar M. Geographical information systems principles of ordinary kriging interpolator. *Journal of Applied Sciences* 2010; **10**(11): 852-67.
29. Patro S, Sahu KK. Normalization: A preprocessing stage. *arXiv preprint arXiv:150306462* 2015.
30. Moore M, Gelfeld B, Okunogbe A, Christopher P. Identifying future disease hot spots: infectious disease vulnerability index: Rand Corporation; 2016.
31. Team RC. R: A language and environment for statistical computing [Internet]. Vienna (Austria): R Foundation for Statistical Computing [cited 2019 Aug 8]. 2020.
32. Siraj DS, Siraj AS, Mapes A. Early estimates of COVID-19 infections in small, medium and large population clusters. *medRxiv* 2020.
33. Getaneh Y, Yizengaw A, Adane S, et al. Global lessons and Potential strategies in combating COVID-19 pandemic in Ethiopia: Systematic Review. *medRxiv* 2020.
34. Tesfaye TD, Temesgen WA, Kasa AS, Yismaw YS. Prevalence and associated factors of hypertension in Amhara regional state city and its' surrounding rural districts: a community-based cross-sectional study. *African Health Sciences* 2019; **19**(3): 2580-90.

- 1  
2  
3 499 35. Kibret KT, Mesfin YM. Prevalence of hypertension in Ethiopia: a systematic meta-  
4 500 analysis. *Public Health Reviews* 2015; **36**(1): 1-12.
- 5 501 36. Hartley DM, Perencevich EN. Public health interventions for COVID-19: emerging  
6 502 evidence and implications for an evolving public health crisis. *Jama* 2020; **323**(19): 1908-9.
- 7 503 37. Pan A, Liu L, Wang C, et al. Association of public health interventions with the  
8 504 epidemiology of the COVID-19 outbreak in Wuhan, China. *Jama* 2020; **323**(19): 1915-23.
- 9 505 38. Stafford N. Covid-19: Why Germany's case fatality rate seems so low. *Bmj* 2020;  
10 506 **369**.
- 11 507 39. Organization WH. Density of physicians (total number per 1000 population, latest  
12 508 available year). *Global Health Observatory (GHO) data* 2017.
- 13 509 40. Williamson E, Walker AJ, Bhaskaran KJ, et al. OpenSAFELY: factors associated  
14 510 with COVID-19-related hospital death in the linked electronic health records of 17 million  
15 511 adult NHS patients. *medRxiv* 2020.
- 16 512 41. Ahmadi M, Sharifi A, Dorosti S, Ghouschi SJ, Ghanbari N. Investigation of  
17 513 effective climatology parameters on COVID-19 outbreak in Iran. *Science of The Total*  
18 514 *Environment* 2020: 138705.
- 19 515 42. Ahmad K, Erqou S, Shah N, et al. Association of Poor Housing Conditions with  
20 516 COVID-19 Incidence and Mortality Across US Counties. *medRxiv* 2020.
- 21 517 43. Ho FK, Celis-Morales CA, Gray SR, et al. Modifiable and non-modifiable risk factors  
22 518 for COVID-19: results from UK Biobank. *medRxiv* 2020.
- 23 519 44. Zheng R, Xu Y, Wang W, Ning G, Bi Y. Spatial transmission of COVID-19 via  
24 520 public and private transportation in China. *Travel Medicine and Infectious Disease* 2020.
- 25 521 45. Chinazzi M, Davis JT, Ajelli M, et al. The effect of travel restrictions on the spread of  
26 522 the 2019 novel coronavirus (COVID-19) outbreak. *Science* 2020; **368**(6489): 395-400.
- 27 523 46. Holtmann M, Jones M, Shah A, Holtmann G. Low ambient temperatures are  
28 524 associated with more rapid spread of COVID-19 in the early phase of the endemic.  
29 525 *Environmental Research* 2020.
- 30 526 47. Sobral MFF, Duarte GB, da Penha Sobral AIG, Marinho MLM, de Souza Melo A.  
31 527 Association between climate variables and global transmission of SARS-CoV-2. *Science of*  
32 528 *The Total Environment* 2020; **729**: 138997.
- 33 529 48. Wang J, Tang K, Feng K, Lv W. High temperature and high humidity reduce the  
34 530 transmission of COVID-19. *Available at SSRN 3551767* 2020.
- 35 531 49. Li J, Zhang L, Ren Z, Xing C, Qiao P, Chang B. Meteorological factors correlate with  
36 532 transmission of 2019-nCoV: Proof of incidence of novel coronavirus pneumonia in Hubei  
37 533 Province, China. *medRxiv* 2020.
- 38 534 50. Basker GV. A review on hazards of khat chewing. *Int J Pharm Pharm Sci* 2013; **5**(3):  
39 535 74-7.
- 40 536 51. Lopes H, McKay V, de Cima P. ADULT LEARNING EDUCATION AS A TOOL  
41 537 TO CONTAIN PANDEMICS: THE COVID-19 EXPERIENCE.
- 42 538 52. Ayedee N, Manocha D. Role of Media (Television) in Creating a Positive  
43 539 Atmosphere in COVID-19 during Lockdown in India. *Role of Media (Television) in Creating*  
44 540 *a Positive Atmosphere in COVID-19 during Lockdown in India (May 19, 2020)* 2020.
- 45 541 53. Wood CS, Thomas MR, Budd J, et al. Taking connected mobile-health diagnostics of  
46 542 infectious diseases to the field. *Nature* 2019; **566**(7745): 467-74.
- 47 543 54. Bertozzi S, Padian NS, Wegbreit J, et al. HIV/AIDS prevention and treatment.  
48 544 *Disease control priorities in developing countries* 2006; **2**: 331-70.
- 49 545 55. WHO. Water, sanitation, hygiene, and waste management for the COVID-19 virus:  
50 546 interim guidance, 23 April 2020: World Health Organization, 2020.
- 51 547 56. WHO. Infection prevention and control guidance for long-term care facilities in the  
52 548 context of COVID-19: interim guidance, 21 March 2020: World Health Organization, 2020.

- 1  
2  
3 549 57. WHO. WHO Releases Guidelines to Help Countries Maintain Essential Health  
4 550 Services During the COVID-19 Pandemic. Geneva, Switzerland: World Health Organization;  
5 551 2020.  
6  
7 552 58. Murthy S, Gomersall CD, Fowler RA. Care for critically ill patients with COVID-19.  
8 553 *Jama* 2020; **323**(15): 1499-500.  
9 554 59. Tadolini M, Codecasa LR, García-García J-M, et al. Active tuberculosis, sequelae and  
10 555 COVID-19 co-infection: first cohort of 49 cases. *European Respiratory Journal* 2020.  
11  
12 556  
13  
14 557  
15  
16 558  
17  
18 559  
19  
20 560  
21  
22 561  
23  
24 562  
25  
26 563  
27  
28 564  
29  
30 565  
31  
32 566  
33  
34 567  
35  
36 568  
37  
38 569  
39  
40 570  
41  
42 571  
43  
44 572  
45  
46 573  
47  
48 574  
49  
50 575  
51  
52 576  
53  
54 577  
55  
56 578  
57  
58 579  
59  
60 580  
581

For peer review only

582

583

## Tables

584

585

**Table 1:** Data sources and definitions of indicators for the vulnerability of COVID-19 in

586

Ethiopia.

| Indicators                       | Data sources           | Spatial resolution           | Definitions                                                                                                                                                                                                    |
|----------------------------------|------------------------|------------------------------|----------------------------------------------------------------------------------------------------------------------------------------------------------------------------------------------------------------|
| <b>Demographic indicators</b>    |                        |                              |                                                                                                                                                                                                                |
| Male sex                         | EDHS 2016              | Latitude and longitude point | Total number of male populations divided by the total number of people participated in the survey                                                                                                              |
| Older age                        | EDHS 2016              | Latitude and longitude point | Total number of people with age $\geq 65$ years divided by the total number of people participated in the survey                                                                                               |
| <b>Socio-economic indicators</b> |                        |                              |                                                                                                                                                                                                                |
| Population density               | WorldPop               | 1 km X 1 km                  | Number of people per square kilometre (grid)                                                                                                                                                                   |
| Number of household members      | EDHS 2016              | Latitude and longitude point | Average number of people living in a house                                                                                                                                                                     |
| Low wealth index                 | EDHS 2016              | Latitude and longitude point | Number of people with low wealth index (poorer and poorest) divided by the total number of people participated in the survey                                                                                   |
| <b>Connectivity indicators</b>   |                        |                              |                                                                                                                                                                                                                |
| Travel times to cities           | MAP                    | 1 km $\times$ 1 km           | Travel time in minutes to the nearest city with a population of more than 50,000                                                                                                                               |
| Proximity to national borders    | DHS Spatial Repository | Latitude and longitude point | The geodesic distance to the nearest international borders                                                                                                                                                     |
| Distance to major roads          | World Bank             | District                     | Distance in km to cross-country round                                                                                                                                                                          |
| <b>Climatic indicators</b>       |                        |                              |                                                                                                                                                                                                                |
| Mean temperature                 | WorldClim              | 1 km $\times$ 1 km           | Annual mean environmental air temperature ( $^{\circ}$ C)                                                                                                                                                      |
| Mean precipitation               | WorldClim              | 1 km $\times$ 1 km           | Annual mean rainfall (mm)                                                                                                                                                                                      |
| Wind speed                       | WorldClim              | 1 km $\times$ 1 km           | Annual mean wind speed ( $m\ s^{-1}$ )                                                                                                                                                                         |
| Solar radiation                  | WorldClim              | 1 km $\times$ 1 km           | Annual mean solar radiation ( $kJ\ m^{-2}\ day^{-1}$ )                                                                                                                                                         |
| Water vapour pressure            | WorldClim              | 1 km $\times$ 1 km           | Annual mean water vapour pressure (kPa), equivalent to absolute humidity.                                                                                                                                      |
| <b>Behavioural indicators</b>    |                        |                              |                                                                                                                                                                                                                |
| Khat chewing                     | EDHS 2016              | Latitude and longitude point | Total number of people chewing khat in the last one month prior to the survey divided by the total number of people participating in the survey                                                                |
| Alcohol drinking                 | EDHS 2016              | Latitude and longitude point | Total number of people drinking alcohol in the month prior to the survey divided by the total number of people participating in the survey                                                                     |
| Cigarette smoking                | EPHI STEPS             | Latitude and longitude point | Total number of people currently smoke cigarettes divided by the total number of people participating in the survey                                                                                            |
| Cooking inside the household     | EDHS 2016              | Latitude and longitude point | Total number of households where cooking takes place inside the house without a separate building or outdoors (i.e. exposure to smoke inside the home) divided by the total number of households in the survey |

1

2

|                                   |           |                                    |                                                                                                                                            |
|-----------------------------------|-----------|------------------------------------|--------------------------------------------------------------------------------------------------------------------------------------------|
| 3 Use solid fuel for<br>4 cooking | EDHS 2016 | Latitude and<br>longitude<br>point | Number of households used some type of solid fuel<br>(wood, dung, grass, crop) for cooking food divided by<br>all households in the survey |
|-----------------------------------|-----------|------------------------------------|--------------------------------------------------------------------------------------------------------------------------------------------|

#### 6 Disease prevention knowledge indicators

|                         |           |                                    |                                                                                                                                                                                     |
|-------------------------|-----------|------------------------------------|-------------------------------------------------------------------------------------------------------------------------------------------------------------------------------------|
| 7 Adult illiteracy rate | EDHS 2016 | Latitude and<br>longitude<br>point | Total number of adults (aged 15 years and above) who<br>had not attended school or who cannot read and write<br>divided by the total number of adults participated in the<br>survey |
|-------------------------|-----------|------------------------------------|-------------------------------------------------------------------------------------------------------------------------------------------------------------------------------------|

|                                        |           |                                    |                                                                                                          |
|----------------------------------------|-----------|------------------------------------|----------------------------------------------------------------------------------------------------------|
| 12 Access to listen to the<br>13 radio | EDHS 2016 | Latitude and<br>longitude<br>point | Total number of people who had not access to listen to<br>the radio divided by total survey participants |
|----------------------------------------|-----------|------------------------------------|----------------------------------------------------------------------------------------------------------|

|                       |           |                                    |                                                                                                   |
|-----------------------|-----------|------------------------------------|---------------------------------------------------------------------------------------------------|
| 15 Access to watch TV | EDHS 2016 | Latitude and<br>longitude<br>point | Total number of people have no access to watch<br>television divided by total survey participants |
|-----------------------|-----------|------------------------------------|---------------------------------------------------------------------------------------------------|

|                                 |           |                                    |                                                                                                            |
|---------------------------------|-----------|------------------------------------|------------------------------------------------------------------------------------------------------------|
| 18 Mobile phone<br>19 ownership | EDHS 2016 | Latitude and<br>longitude<br>point | Total number of people have no access to mobile phone<br>divide by the total number of survey participants |
|---------------------------------|-----------|------------------------------------|------------------------------------------------------------------------------------------------------------|

|                               |           |                                    |                                                                                                                          |
|-------------------------------|-----------|------------------------------------|--------------------------------------------------------------------------------------------------------------------------|
| 21 Knowledge toward<br>22 HIV | EDHS 2016 | Latitude and<br>longitude<br>point | Number of people with poor knowledge towards HIV<br>divided by the total number of people participating in<br>the survey |
|-------------------------------|-----------|------------------------------------|--------------------------------------------------------------------------------------------------------------------------|

#### 24 Hand hygiene indicators

|                                       |           |                                    |                                                                                       |
|---------------------------------------|-----------|------------------------------------|---------------------------------------------------------------------------------------|
| 26 Travel time to water<br>27 sources | EDHS 2016 | Latitude and<br>longitude<br>point | Mean travel time in minutes to obtain water source (i.e.<br>access to a water source) |
|---------------------------------------|-----------|------------------------------------|---------------------------------------------------------------------------------------|

|                          |           |                                    |                                                                                                                              |
|--------------------------|-----------|------------------------------------|------------------------------------------------------------------------------------------------------------------------------|
| 29 Place for handwashing | EDHS 2016 | Latitude and<br>longitude<br>point | Number of households have no fixed or mobile place<br>for handwashing divided by total number of households<br>in the survey |
|--------------------------|-----------|------------------------------------|------------------------------------------------------------------------------------------------------------------------------|

|                                                               |           |                                    |                                                                                                                                     |
|---------------------------------------------------------------|-----------|------------------------------------|-------------------------------------------------------------------------------------------------------------------------------------|
| 32 Soap or detergent<br>33 availability for<br>34 handwashing | EDHS 2016 | Latitude and<br>longitude<br>point | Number of households have no essential handwashing<br>agents (i.e. soap, and detergent) divided by total<br>household in the survey |
|---------------------------------------------------------------|-----------|------------------------------------|-------------------------------------------------------------------------------------------------------------------------------------|

#### 35 Comorbidities indicators

|        |               |                                    |                                                                                       |
|--------|---------------|------------------------------------|---------------------------------------------------------------------------------------|
| 36 HTN | EPHI<br>STEPS | Latitude and<br>longitude<br>point | Total number of people with HTN divided by the total<br>number of survey participants |
|--------|---------------|------------------------------------|---------------------------------------------------------------------------------------|

|       |               |                                    |                                                                                      |
|-------|---------------|------------------------------------|--------------------------------------------------------------------------------------|
| 40 DM | EPHI<br>STEPS | Latitude and<br>longitude<br>point | Total number of people with DM divided by the total<br>number of survey participants |
|-------|---------------|------------------------------------|--------------------------------------------------------------------------------------|

|        |               |                                    |                      |
|--------|---------------|------------------------------------|----------------------|
| 43 BMI | EPHI<br>STEPS | Latitude and<br>longitude<br>point | Mean body mass index |
|--------|---------------|------------------------------------|----------------------|

|        |               |                                    |                                                                                              |
|--------|---------------|------------------------------------|----------------------------------------------------------------------------------------------|
| 46 CVD | EPHI<br>STEPS | Latitude and<br>longitude<br>point | Total number of people with heart disease divided by<br>total number of people in the survey |
|--------|---------------|------------------------------------|----------------------------------------------------------------------------------------------|

|                |               |                                    |                        |
|----------------|---------------|------------------------------------|------------------------|
| 49 Cholesterol | EPHI<br>STEPS | Latitude and<br>longitude<br>point | Mean cholesterol level |
|----------------|---------------|------------------------------------|------------------------|

|                   |           |                                    |                                                                   |
|-------------------|-----------|------------------------------------|-------------------------------------------------------------------|
| 52 HIV prevalence | EDHS 2016 | Latitude and<br>longitude<br>point | Total number of people with HIV divided by survey<br>participants |
|-------------------|-----------|------------------------------------|-------------------------------------------------------------------|

|           |      |          |                                                                                                                                |
|-----------|------|----------|--------------------------------------------------------------------------------------------------------------------------------|
| 56 TB SMR | EMOH | District | Standardized morbidity ratio (SMR) as measured by<br>observed number of TB cases divided by the expected<br>number of TB cases |
|-----------|------|----------|--------------------------------------------------------------------------------------------------------------------------------|

#### 59 Service availability and readiness indicators

60



1  
2  
3  
4  
5  
6  
7  
8  
9  
10  
11  
12  
13  
14  
15  
16  
17  
18  
19  
20  
21  
22  
23  
24  
25  
26  
27  
28  
29  
30  
31  
32  
33  
34  
35  
36  
37  
38  
39  
40  
41  
42  
43  
44  
45  
46  
47  
48  
49  
50  
51  
52  
53  
54  
55  
56  
57  
58  
59  
60

|                                                                                                                                                                                                                                                                                                                                                                                    |           |                              |                                                                                                                                                                                       |
|------------------------------------------------------------------------------------------------------------------------------------------------------------------------------------------------------------------------------------------------------------------------------------------------------------------------------------------------------------------------------------|-----------|------------------------------|---------------------------------------------------------------------------------------------------------------------------------------------------------------------------------------|
| Health care access problem                                                                                                                                                                                                                                                                                                                                                         | EDHS 2016 | Latitude and longitude point | Difficulty of getting advice or treatment due to lack of money, or distance to a health facility                                                                                      |
| General service readiness and availability                                                                                                                                                                                                                                                                                                                                         | EPHI SARA | Latitude and longitude point | Availability of equipment and supplies (i.e. basic amenities, equipment, standard precautions, diagnostic capacity, essential medicines) necessary to provide general health services |
| ICU availability                                                                                                                                                                                                                                                                                                                                                                   | EPHI SARA | Latitude and longitude point | Availability of Critical Care Services (ICU) in hospitals                                                                                                                             |
| CRD readiness index                                                                                                                                                                                                                                                                                                                                                                | EPHI SARA | Latitude and longitude point | Availability of specific services for Chronic respiratory disease (CRD) diagnosis, management, and follow up                                                                          |
| TB readiness index                                                                                                                                                                                                                                                                                                                                                                 | EPHI SARA | Latitude and longitude point | Availability of specific services for tuberculosis diagnosis, management, and follow up                                                                                               |
| Diabetes readiness index                                                                                                                                                                                                                                                                                                                                                           | EPHI SARA | Latitude and longitude point | Availability of specific service for diabetes diagnosis and management and follow up                                                                                                  |
| <p><i>G-Econ: Geographically based Economic data; EDHS: Ethiopia demographic and health survey; UN OCHA: United Nation Office for Coordination of Humanitarian Affairs; MAP: SRTM: Malaria Atlas Project; Shuttle Radar Topography Mission; EPHI: Ethiopia Public Health Institute; EMOH: Ethiopia Ministry of Health; SARA: Service Availability and Readiness Assessment</i></p> |           |                              |                                                                                                                                                                                       |

587  
588  
589  
590  
591  
592  
593  
594  
595  
596  
597  
598  
599  
600  
601  
602  
603  
604  
605  
606  
607  
608  
609  
610  
611  
612  
613  
614  
615  
616  
617

1  
2  
3 618  
4 619  
5 620  
6 621

**Table 2: Evidence for risk of COVID-19 infection, severity, and death**

| Indicators                                     | Risk factors | Evidence                                                                                                                           | References                                |
|------------------------------------------------|--------------|------------------------------------------------------------------------------------------------------------------------------------|-------------------------------------------|
| <b>Demographic indicators</b>                  |              |                                                                                                                                    |                                           |
| Male sex                                       | Severity     | Death from and severity of COVID-19 was strongly associated with being male (HR 1.99, 95%CI: 1.88-2.10)                            | Williamson E <sup>40</sup>                |
| Older age                                      | Severity     | Older than 65 years were risk factors for disease progression in patients with COVID-19 (OR =6.06, 95% CI: 3.98, 9.22)             | Zheng Z <sup>22</sup>                     |
| <b>Socio-economic indicators</b>               |              |                                                                                                                                    |                                           |
| Population density                             | Infection    | High population density is a risk factor for COVID-19 infection                                                                    | Ahmadi M <sup>41</sup>                    |
| Number of household members                    | Infection    | Areas with a higher percentage of households with more than one person per room had a higher incidence of COVID-19                 | Ahmad K <sup>42</sup>                     |
| Low wealth index                               | Infection    | Socio-economic deprivation (RR 1.26 per SD increase in Townsend Index) associated with COVID -19 infection                         | Ho FK <sup>43</sup>                       |
| <b>Connectivity indicators</b>                 |              |                                                                                                                                    |                                           |
| Travel times to cities                         | Infection    | The distance between Wuhan and other cities was inversely associated with the numbers of COVID-19 cases in that city               | Zheng R <sup>44</sup>                     |
| Proximity to national borders                  | Infection    | Cross country moment is a risk factor for COVID-19 transmission and importation                                                    | Chinazz M <sup>45</sup>                   |
| Distance to major roads                        | Infection    | Spread of COVID-19 was correlated positively with public transportation per capita                                                 | Ayeneu B <sup>16</sup> .                  |
| <b>Climatic indicators</b>                     |              |                                                                                                                                    |                                           |
| Mean temperature                               | Infection    | Low ambient temperatures are associated with more rapid spread of COVID-19                                                         | Holtmann M <sup>46</sup>                  |
| Mean precipitation                             | Infection    | Countries with higher rainfall measurements showed an increase in COVID-19 transmission                                            | Sobral MFF <sup>47</sup>                  |
| Wind speed                                     | Infection    | Areas with low values of wind speed associated with a high rate of COVID-19 infection                                              | Ahmadi M <sup>41</sup>                    |
| Solar radiation                                | Infection    | Areas with low values of solar radiation exposure associated with a high rate of COVID-19 infection                                | Ahmadi M <sup>41</sup>                    |
| Water vapour pressure                          | Infection    | High humidity reduces the transmission of COVID-19. Water vapour pressure negatively correctly with COVID-19 infection.            | Wang J <sup>48</sup> , Li J <sup>49</sup> |
| <b>Behavioural indicators</b>                  |              |                                                                                                                                    |                                           |
| Khat chewing                                   | Severity     | There is an association between khat chewing and chronic illness such as HIV infection, elevated diastolic blood pressure          | Basker GV <sup>50</sup>                   |
| Alcohol drinking                               | Severity     | Patients with alcohol use disorders at increased risk for COVID-19                                                                 | Testino G <sup>21</sup>                   |
| Cigarette smoking                              | Severity     | Current smoking was a risk factor for disease progression in patients with COVID-19 (OR =2.51, 95% CI: 1.39, 3.32)                 | Zheng Z <sup>22</sup>                     |
| Cooking inside the household                   | Severity     | Areas with a higher percentage of incomplete kitchen facilities had a higher incidence of, and mortality associated with, COVID-19 | Ahmad K <sup>42</sup>                     |
| Use solid fuel for cooking                     | Severity     | Areas with a higher percentage of incomplete kitchen facilities had a higher incidence of, and mortality associated with, COVID-19 | Ahmad K <sup>42</sup>                     |
| <b>Disease prevention knowledge indicators</b> |              |                                                                                                                                    |                                           |
| Adult illiteracy rate                          | Infection    | Adult learning education is a tool to contain the COVID-19 pandemics                                                               | Lopes H <sup>51</sup>                     |
| Access to listen to radio                      | Infection    | Access to media is a crucial factor in public health responses to an outbreak                                                      | Ayedee N <sup>52</sup>                    |
| Access to watch TV                             | Infection    | Media (Television) has a significant role in creating a positive atmosphere in COVID-19                                            | Ayedee N <sup>52</sup>                    |
| Mobile phone ownership                         | Infection    | Mobile phone calls and text messages help for the diagnosis, management, and control of infectious diseases                        | Wood S <sup>53</sup>                      |

1  
2

|                                                                                                                                                                                                                                                                                                                                                                                 |                                                |           |                                                                                                                              |                            |
|---------------------------------------------------------------------------------------------------------------------------------------------------------------------------------------------------------------------------------------------------------------------------------------------------------------------------------------------------------------------------------|------------------------------------------------|-----------|------------------------------------------------------------------------------------------------------------------------------|----------------------------|
| 3<br>4<br>5                                                                                                                                                                                                                                                                                                                                                                     | Knowledge towards HIV                          | Infection | Knowledge towards an infectious disease such as HIV can help to control the transmission of the diseases                     | Bertozzi S <sup>54</sup>   |
| <b>Hand hygiene indicators</b>                                                                                                                                                                                                                                                                                                                                                  |                                                |           |                                                                                                                              |                            |
| 6<br>7<br>8                                                                                                                                                                                                                                                                                                                                                                     | Travel time to water sources                   | Infection | Adequate water supply is essential for the control of COVID-19 infection                                                     | WHO <sup>55</sup>          |
| 9<br>10                                                                                                                                                                                                                                                                                                                                                                         | Place for handwashing                          | Infection | Hand washing is recommended by WHO for the control of COVID-19 infection                                                     | WHO <sup>56</sup>          |
| 11<br>12                                                                                                                                                                                                                                                                                                                                                                        | Soap or detergent availability for handwashing | Infection | Availability of soap or detergent is essential to keep hand hygiene for the prevention of COVID-19 infection                 | WHO <sup>56</sup>          |
| <b>Comorbidities indicators</b>                                                                                                                                                                                                                                                                                                                                                 |                                                |           |                                                                                                                              |                            |
| 13<br>14<br>15<br>16                                                                                                                                                                                                                                                                                                                                                            | HTN                                            | Severity  | Hypertension was statistically significant with a higher rate of servery and death (OR = 2.72, 95% CI: 1.60,4.64)            | Zheng Z <sup>22</sup>      |
| 17<br>18<br>19                                                                                                                                                                                                                                                                                                                                                                  | DM                                             | Severity  | Death from COVID-19 was associated with DM (HR 1.50, 95%CI: 1.40-1.60) 1.50                                                  | Williamson E <sup>40</sup> |
| 20<br>21                                                                                                                                                                                                                                                                                                                                                                        | BMI                                            | Severity  | Death from COVID-19 was associated with higher BMI (HR 1.27, 95%CI: 1.18-1.36)                                               | Williamson E <sup>40</sup> |
| 22<br>23                                                                                                                                                                                                                                                                                                                                                                        | CVD                                            | Severity  | Cardiovascular disease was significantly associated with higher COVID-19 servility and death (OR = 5.19, 95% CI: 3.25, 8.29) | Zheng Z <sup>22</sup>      |
| 24<br>25                                                                                                                                                                                                                                                                                                                                                                        | HIV prevalence                                 | Severity  | Mortality from COVID-19 was associated with immunosuppression (HR 1.69, 95%CI: 1.21-1.34)                                    | Williamson E <sup>40</sup> |
| 26<br>27                                                                                                                                                                                                                                                                                                                                                                        | SB SMR                                         | Severity  | respiratory diseases were significantly associated with COVID-19 death and severity (OR = 5.15, 95% CI: 2.51, 10.57)         | Zheng Z <sup>22</sup>      |
| <b>Service availability and readiness indicators</b>                                                                                                                                                                                                                                                                                                                            |                                                |           |                                                                                                                              |                            |
| 28<br>29                                                                                                                                                                                                                                                                                                                                                                        | Health care access problem                     | Death     | Healthcare resource availability is associated with COVID-19 mortality                                                       | Ji Y <sup>6</sup>          |
| 30<br>31                                                                                                                                                                                                                                                                                                                                                                        | General service readiness                      | Death     | General health service preparedness is essential for combating the COVID-19 pandemic                                         | WHO <sup>57</sup>          |
| 32<br>33                                                                                                                                                                                                                                                                                                                                                                        | ICU availability                               | Death     | Lack of critical care unite increase the risk of death from COVID-19                                                         | Murthy S <sup>58</sup>     |
| 34<br>35<br>36                                                                                                                                                                                                                                                                                                                                                                  | CRD readiness                                  | Death     | Cardiorespiratory disease (CRD) is a risk factor for COVID-19 related death                                                  | Zheng Z <sup>22</sup>      |
| 37<br>38                                                                                                                                                                                                                                                                                                                                                                        | TB readiness                                   | Death     | TB determinants outcomes of patients with COVID-19                                                                           | Tadolini M <sup>59</sup>   |
| 39<br>40                                                                                                                                                                                                                                                                                                                                                                        | Diabetes readiness                             | Death     | Diabetes affects the prognosis of patients with COVID-19                                                                     | Zheng Z <sup>22</sup>      |
| 41-43 <i>Econ: Geographically based Economic data; EDHS: Ethiopia demographic and health survey; UN OCHA: United Nation Office for Coordination of Humanitarian Affairs; MAP: SRTM: Malaria Atlas Project; Shuttle Radar Topography Mission; EPHI: Ethiopia Public Health Institute; EMOH: Ethiopia Ministry of Health; SARA: Service Availability and Readiness Assessment</i> |                                                |           |                                                                                                                              |                            |

44 622  
45  
46  
47  
48  
49  
50  
51  
52  
53  
54  
55  
56  
57  
58  
59  
60

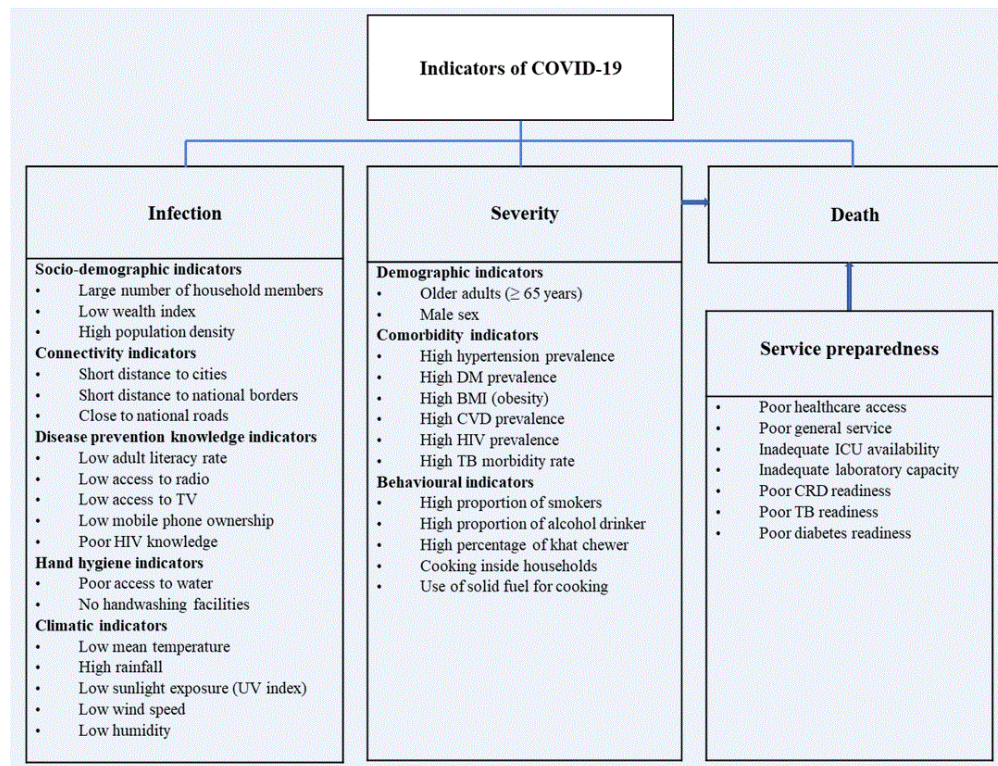

381x292mm (72 x 72 DPI)

1  
2  
3  
4  
5  
6  
7  
8  
9  
10  
11  
12  
13  
14  
15  
16  
17  
18  
19  
20  
21  
22  
23  
24  
25  
26  
27  
28  
29  
30  
31  
32  
33  
34  
35  
36  
37  
38  
39  
40  
41  
42  
43  
44  
45  
46  
47  
48  
49  
50  
51  
52  
53  
54  
55  
56  
57  
58  
59  
60

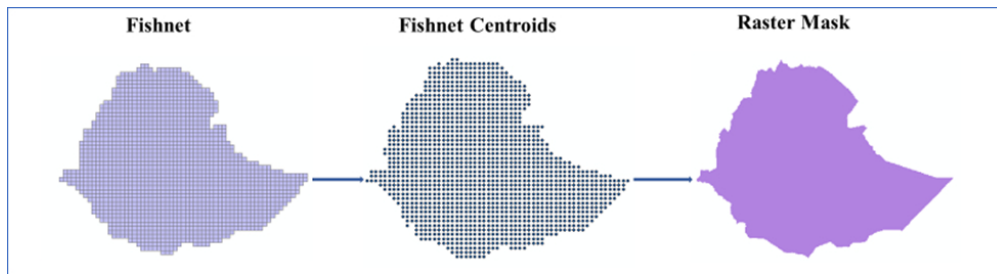

165x44mm (150 x 150 DPI)

1  
2  
3  
4  
5  
6  
7  
8  
9  
10  
11  
12  
13  
14  
15  
16  
17  
18  
19  
20  
21  
22  
23  
24  
25  
26  
27  
28  
29  
30  
31  
32  
33  
34  
35  
36  
37  
38  
39  
40  
41  
42  
43  
44  
45  
46  
47  
48  
49  
50  
51  
52  
53  
54  
55  
56  
57  
58  
59  
60



249x201mm (96 x 96 DPI)

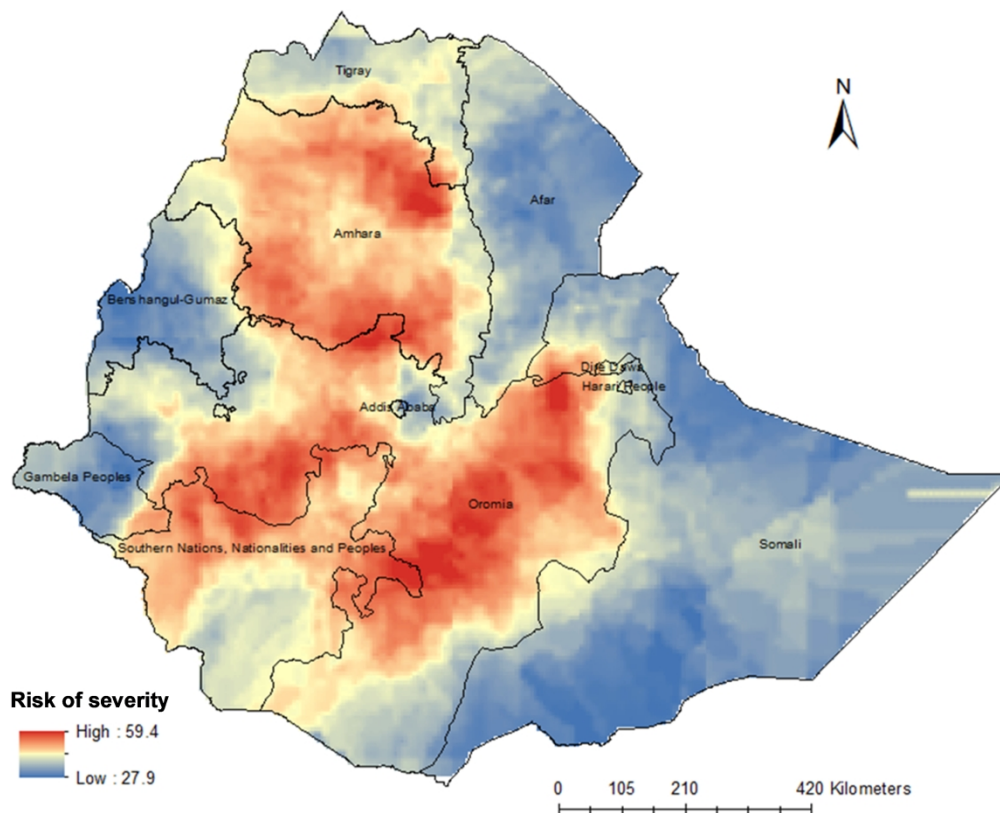

Figure 4

1  
2  
3  
4  
5  
6  
7  
8  
9  
10  
11  
12  
13  
14  
15  
16  
17  
18  
19  
20  
21  
22  
23  
24  
25  
26  
27  
28  
29  
30  
31  
32  
33  
34  
35  
36  
37  
38  
39  
40  
41  
42  
43  
44  
45  
46  
47  
48  
49  
50  
51  
52  
53  
54  
55  
56  
57  
58  
59  
60

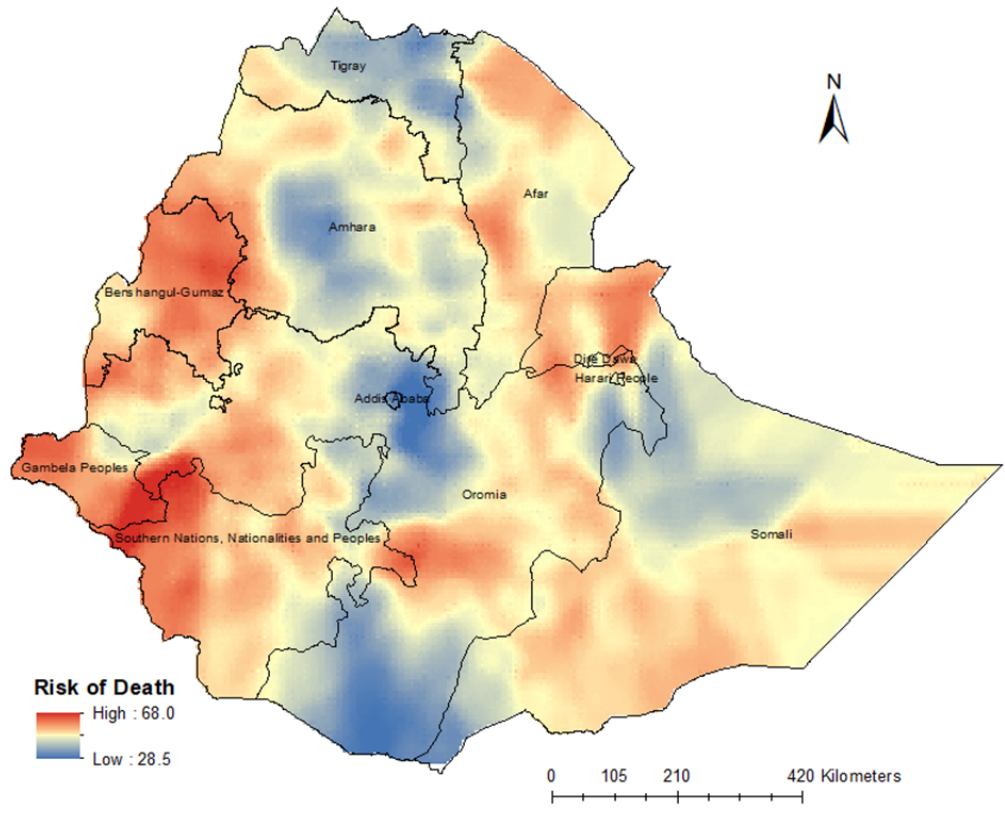

248x200mm (96 x 96 DPI)



1  
2  
3  
4  
5  
6  
7  
8  
9  
10  
11  
12  
13  
14  
15  
16  
17  
18  
19  
20  
21  
22  
23  
24  
25  
26  
27  
28  
29  
30  
31  
32  
33  
34  
35  
36  
37  
38  
39  
40  
41  
42  
43  
44  
45  
46  
47  
48  
49  
50  
51  
52  
53  
54  
55  
56  
57  
58  
59  
60

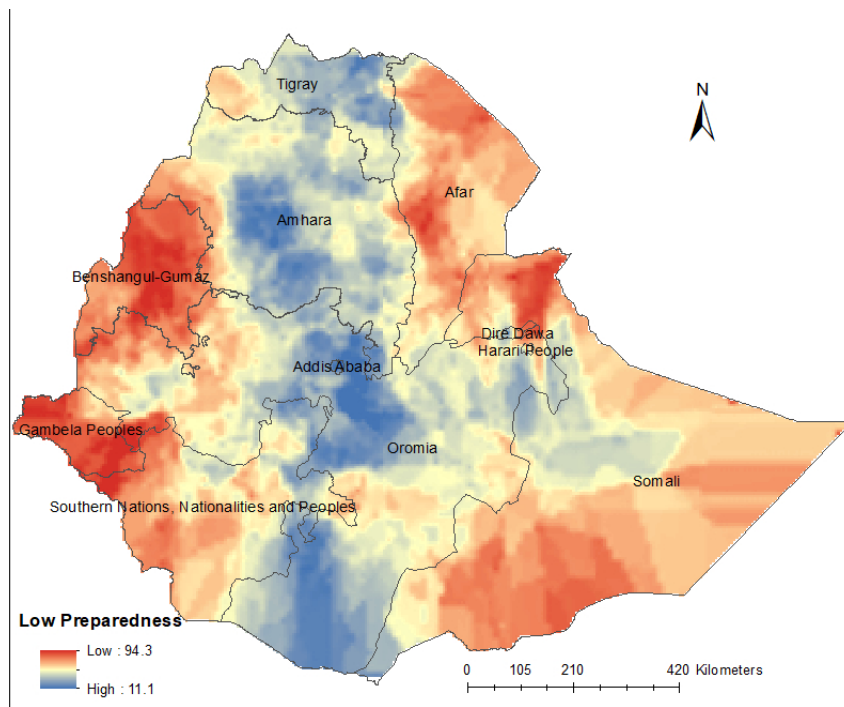

210x296mm (96 x 96 DPI)

Supplemental Information

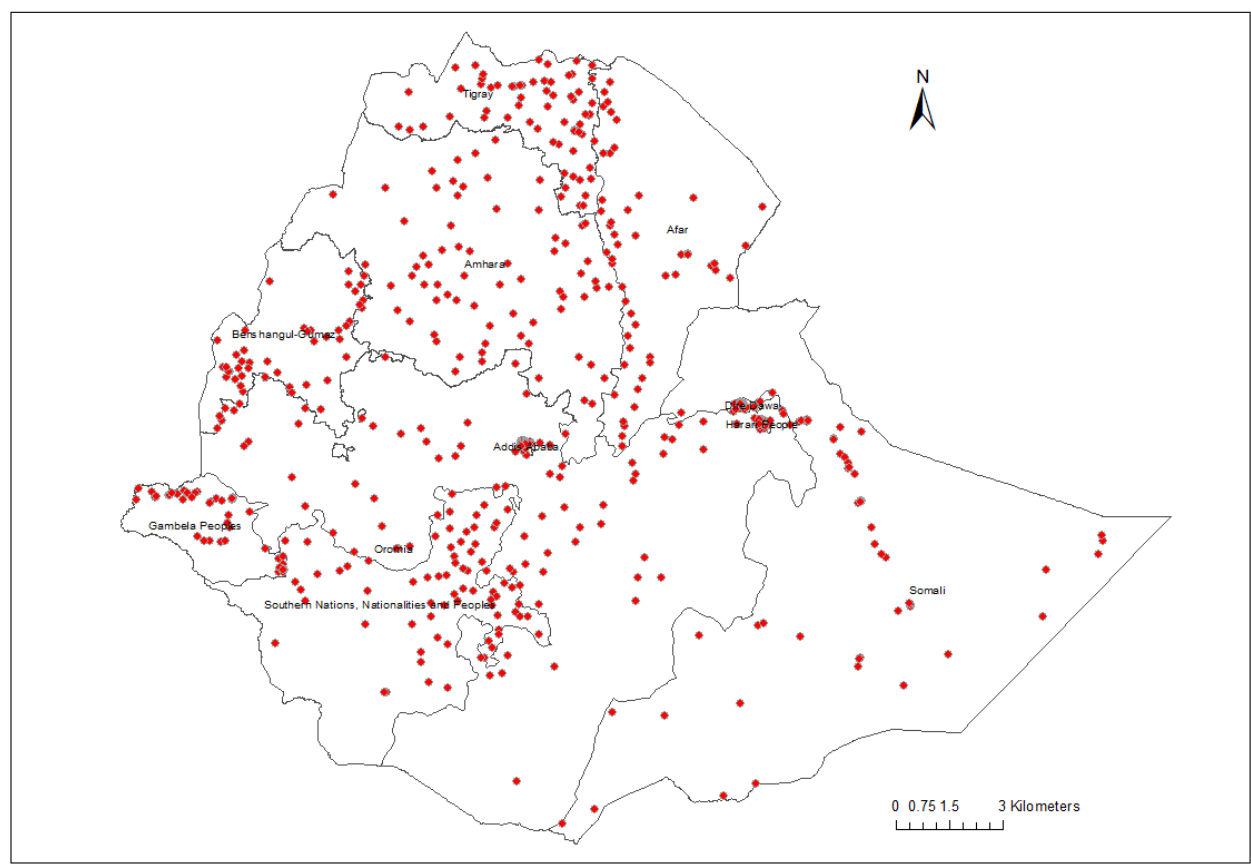

Supplemental Figure 1: A map showing the distribution of the Ethiopia Demographic and Health Survey (EDHS 2016) datapoints.

1  
2  
3  
4  
5  
6  
7  
8  
9  
10  
11  
12  
13  
14  
15  
16  
17  
18  
19  
20  
21  
22  
23  
24  
25  
26  
27  
28  
29  
30  
31  
32  
33  
34  
35  
36  
37  
38  
39  
40  
41  
42  
43  
44  
45  
46  
47  
48  
49  
50  
51  
52  
53  
54  
55  
56  
57  
58  
59  
60

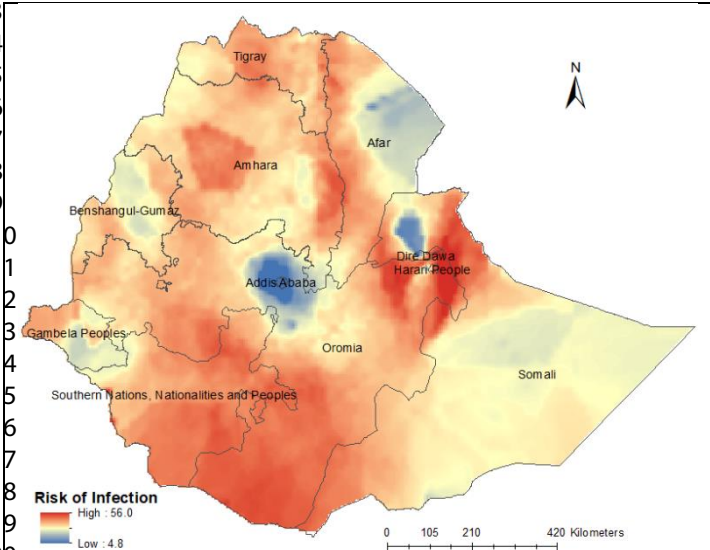

S Figure 2a. COVID-19 infection risk map in Ethiopia, created based on a geometric mean

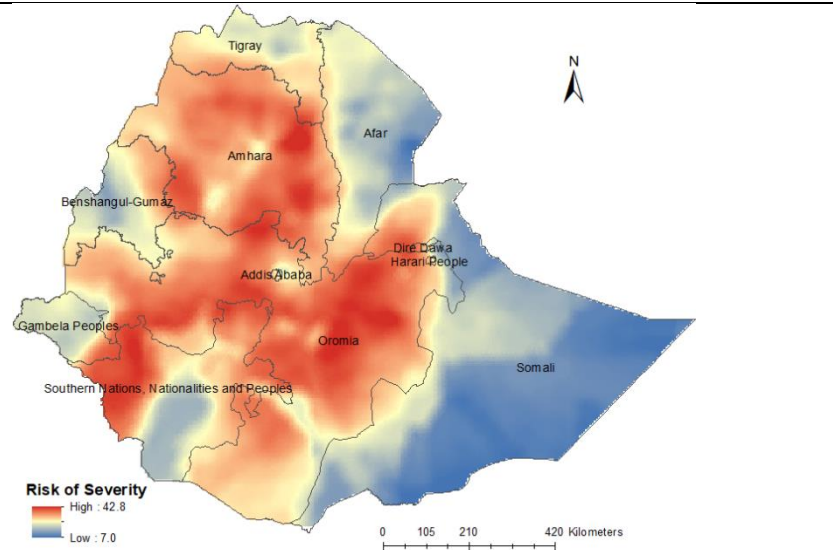

S Figure 2b. COVID-19 severity risk map in Ethiopia, created based on a geometric mean

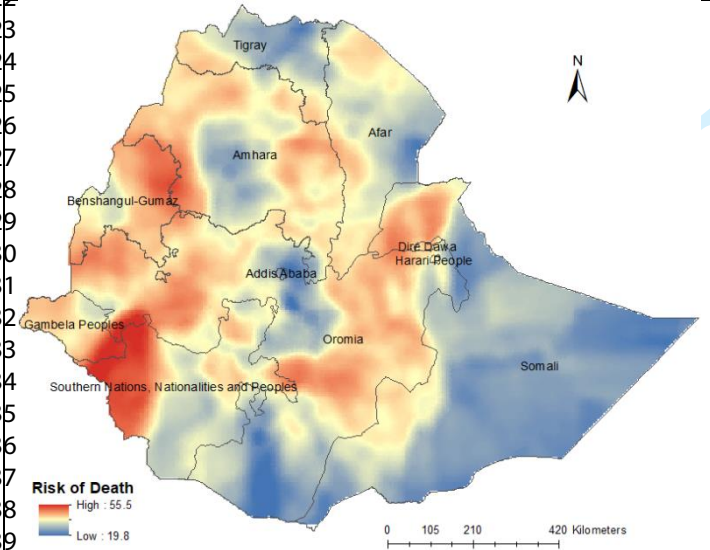

S Figure 2c. Death risk map of COVID-19 in Ethiopia, created based on a geometric mean

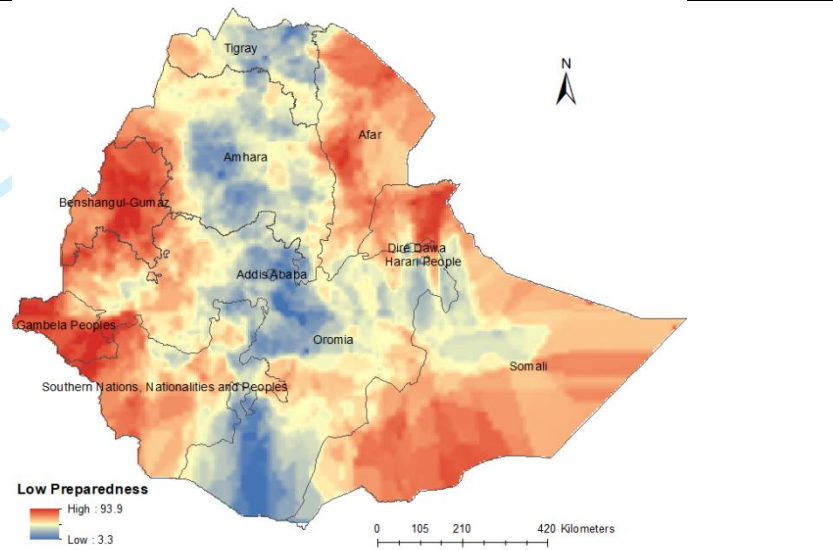

S Figure 2d. Service preparedness map of COVID-19 in Ethiopia, created based on a geometric mean

**Supplemental Figure 2: Vulnerability maps of COVID-19 infection, severity, preparedness, and death in Ethiopia, created based on a geometric mean as alternative aggregation method.**

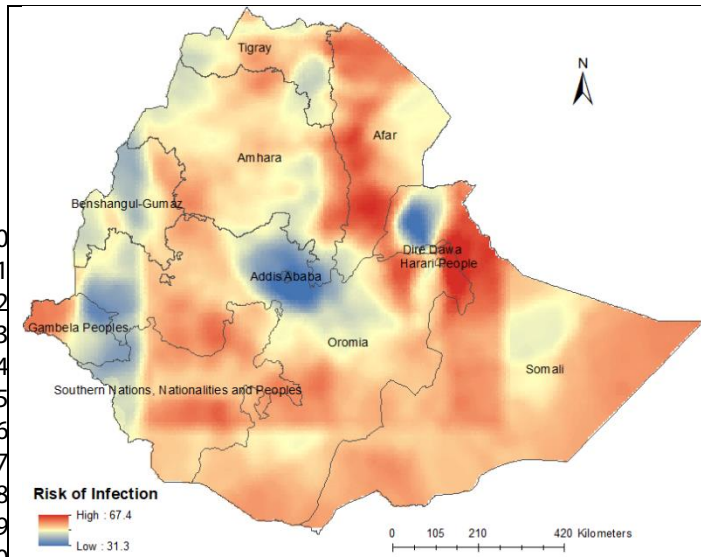

S Figure 3a. COVID-19 infection risk map in Ethiopia, created based on a geometric mean

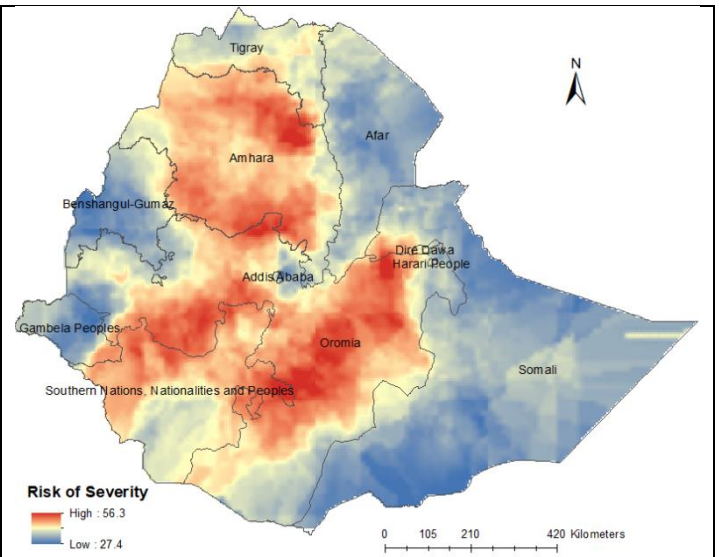

S Figure 3b. COVID-19 severity risk map in Ethiopia, created based on a geometric mean

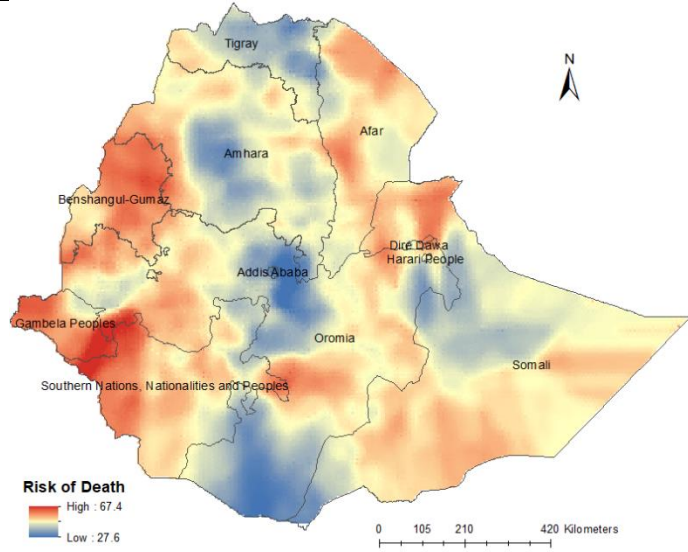

S Figure 3c. Death risk map of COVID-19 in Ethiopia, created based on a geometric mean

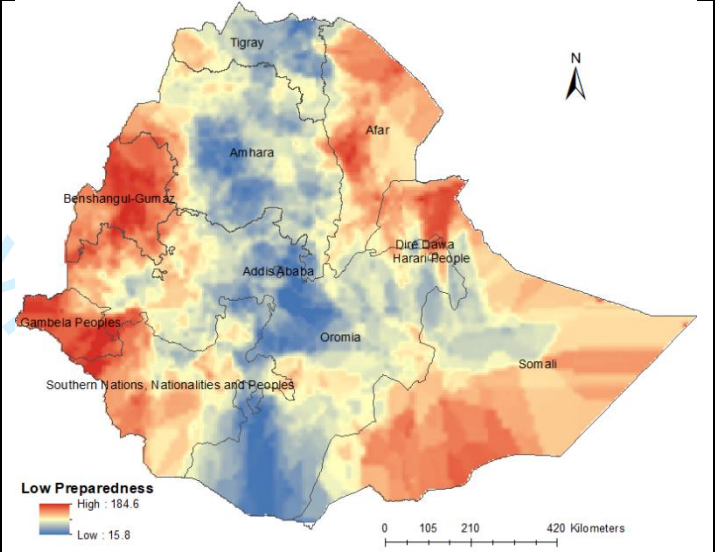

S Figure 3d. Service preparedness map of COVID-19 in Ethiopia, created based on a geometric mean

**Supplemental Figure 3:** Vulnerability maps of COVID-19 infection, severity, preparedness, and death in Ethiopia, created based on a principal component analysis (PCA) as alternative aggregation method.

1  
2  
3  
4  
5  
6  
7  
8  
9  
10  
11  
12  
13  
14  
15  
16  
17  
18  
19  
20  
21  
22  
23  
24  
25  
26  
27  
28  
29  
30  
31  
32  
33  
34  
35  
36  
37  
38  
39  
40  
41  
42  
43  
44  
45  
46  
47  
48  
49  
50  
51  
52  
53  
54  
55  
56  
57  
58  
59  
60

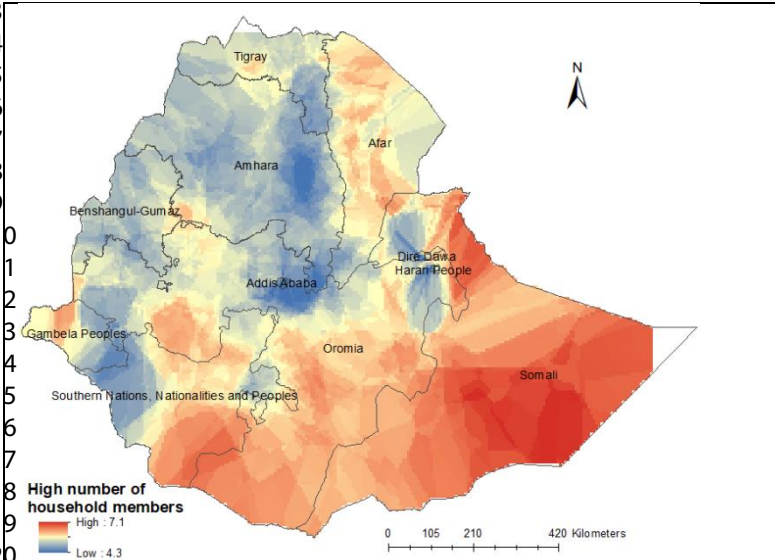

S Figure 4a. Average number of people living in a house

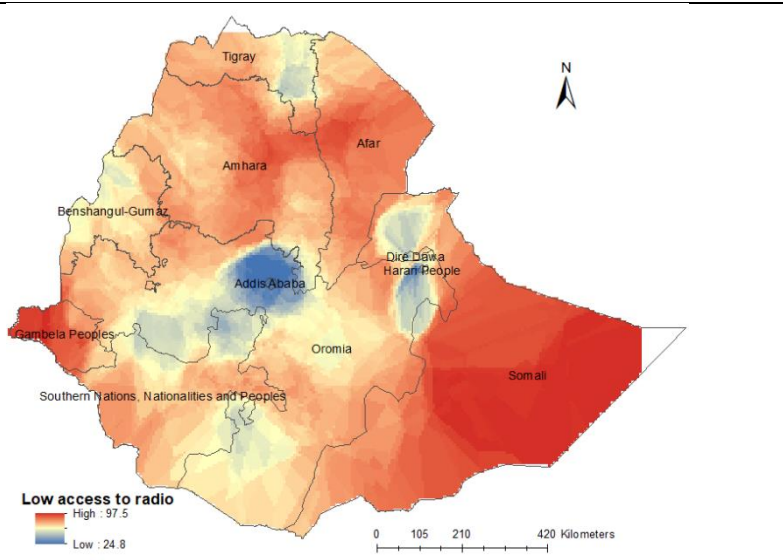

S Figure 4b. Percentage of population have no access to radio

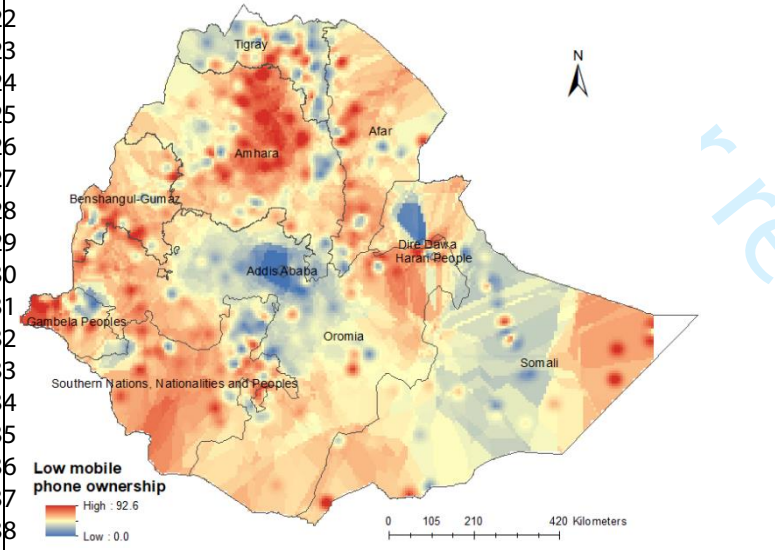

S Figure 4b. Percentage of the population who have not access to mobile phone

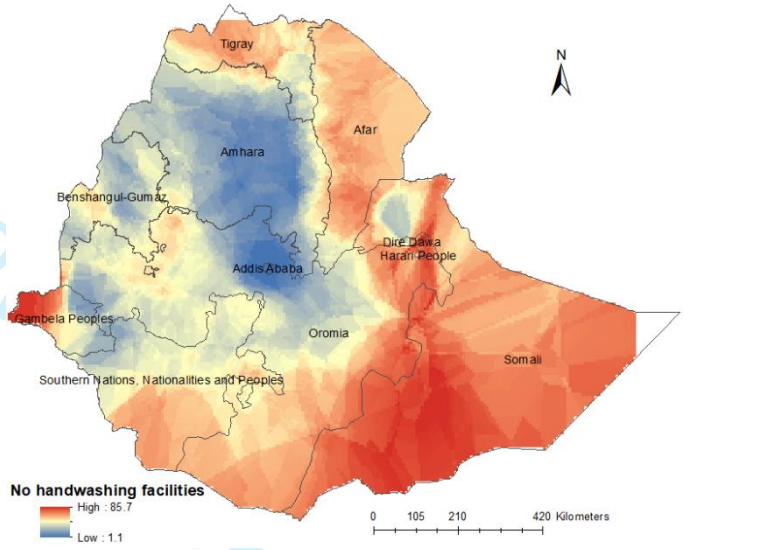

S Figure 4d. Percentage of households who have not hand washing facilities

**Supplemental Figure 4: Selected indicators showing the risk of COVID-19 infection in Ethiopia**

1  
2  
3  
4  
5  
6  
7  
8  
9  
10  
11  
12  
13  
14  
15  
16  
17  
18  
19  
20  
21  
22  
23  
24  
25  
26  
27  
28  
29  
30  
31  
32  
33  
34  
35  
36  
37  
38  
39  
40  
41  
42  
43  
44  
45  
46  
47  
48  
49  
50  
51  
52  
53  
54  
55  
56  
57  
58  
59  
60

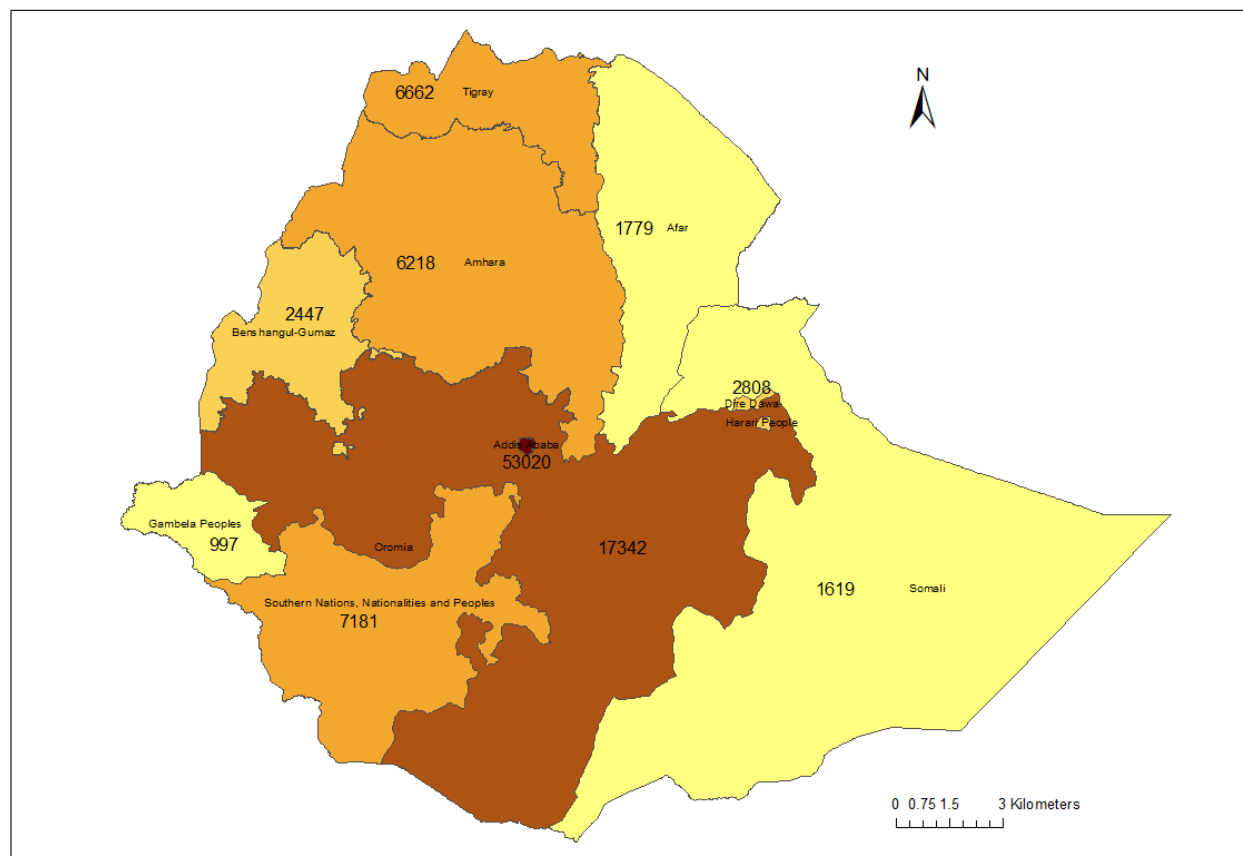

**Supplemental Figure 5:** Number of COVID-19 confirmed cases at regional level in Ethiopia on 15 November 2020.

**Supplemental Table 1: STROBE Statement—Checklist of items included in this study**

| Item No                   | Recommendation                                                                                                                                                                                               | Page number       |
|---------------------------|--------------------------------------------------------------------------------------------------------------------------------------------------------------------------------------------------------------|-------------------|
| <b>Title and abstract</b> |                                                                                                                                                                                                              |                   |
| 1                         | (a) Indicate the study's design with a commonly used term in the title or the abstract                                                                                                                       | 1                 |
|                           | (b) Provide in the abstract an informative and balanced summary of what was done and what was found                                                                                                          | 3                 |
| <b>Introduction</b>       |                                                                                                                                                                                                              |                   |
| 2                         | Background/rationale                                                                                                                                                                                         | 5                 |
| 3                         | Objectives                                                                                                                                                                                                   | 6                 |
| <b>Methods</b>            |                                                                                                                                                                                                              |                   |
| 4                         | Study design                                                                                                                                                                                                 | 6                 |
| 5                         | Setting                                                                                                                                                                                                      | 6                 |
| 6                         | Participants                                                                                                                                                                                                 | 6, 7 & 8          |
| 7                         | Variables                                                                                                                                                                                                    | 6, 7 & 8          |
| 8                         | Data sources/measurement                                                                                                                                                                                     | 6, 7, 8 & Table 1 |
| 9                         | Bias                                                                                                                                                                                                         | 9                 |
| 10                        | Study size                                                                                                                                                                                                   | NA                |
| 11                        | Quantitative variables                                                                                                                                                                                       | 8 & 9             |
| 12                        | Statistical methods                                                                                                                                                                                          | 8 & 9             |
|                           | (a) Describe all statistical methods, including those used to control for confounding                                                                                                                        | 8 & 9             |
|                           | (b) Describe any methods used to examine subgroups and interactions                                                                                                                                          | 8 & 9             |
|                           | (c) Explain how missing data were addressed                                                                                                                                                                  | 8 & 9             |
|                           | (d) If applicable, describe analytical methods taking account of sampling strategy                                                                                                                           | NA                |
|                           | (e) Describe any sensitivity analyses                                                                                                                                                                        | 9                 |
| <b>Results</b>            |                                                                                                                                                                                                              |                   |
| 13                        | Participants                                                                                                                                                                                                 | 9 & 10            |
|                           | (a) Report numbers of individuals at each stage of study—eg numbers potentially eligible, examined for eligibility, confirmed eligible, included in the study, completing follow-up, and analysed            | 9 & 10            |
|                           | (b) Give reasons for non-participation at each stage                                                                                                                                                         | 9 & 10            |
|                           | (c) Consider use of a flow diagram                                                                                                                                                                           | Figure 1          |
| 14                        | Descriptive data                                                                                                                                                                                             | Table 1           |
|                           | (a) Give characteristics of study participants (eg demographic, clinical, social) and information on exposures and potential confounders                                                                     | Table 1           |
|                           | (b) Indicate number of participants with missing data for each variable of interest                                                                                                                          | NA                |
| 15                        | Outcome data                                                                                                                                                                                                 | 9 & 10            |
|                           | Report numbers of outcome events or summary measures                                                                                                                                                         | 9 & 10            |
| 16                        | Main results                                                                                                                                                                                                 | NA                |
|                           | (a) Give unadjusted estimates and, if applicable, confounder-adjusted estimates and their precision (eg, 95% confidence interval). Make clear which confounders were adjusted for and why they were included | NA                |
|                           | (b) Report category boundaries when continuous variables were categorized                                                                                                                                    | NA                |
|                           | (c) If relevant, consider translating estimates of relative risk into absolute risk for a meaningful time period                                                                                             | NA                |
| 17                        | Other analyses                                                                                                                                                                                               | 9                 |
|                           | Report other analyses done—eg analyses of subgroups and interactions, and sensitivity analyses                                                                                                               | 9                 |
| <b>Discussion</b>         |                                                                                                                                                                                                              |                   |
| 18                        | Key results                                                                                                                                                                                                  | 10                |
| 19                        | Limitations                                                                                                                                                                                                  | 13                |
|                           | Discuss limitations of the study, taking into account sources of potential bias or imprecision. Discuss both direction and magnitude of any potential bias                                                   | 13                |
| 20                        | Interpretation                                                                                                                                                                                               | 10-13             |
|                           | Give a cautious overall interpretation of results considering objectives, limitations, multiplicity of analyses, results from similar studies, and other relevant evidence                                   | 10-13             |
| 21                        | Generalisability                                                                                                                                                                                             | 13                |
|                           | Discuss the generalisability (external validity) of the study results                                                                                                                                        | 13                |
| <b>Other information</b>  |                                                                                                                                                                                                              |                   |
| 22                        | Funding                                                                                                                                                                                                      | 15                |
|                           | Give the source of funding and the role of the funders for the present study and, if applicable, for the original study on which the present article is based                                                | 15                |

# BMJ Open

## COVID-19 in Ethiopia: A geospatial analysis of vulnerability to infection, case severity, and death

|                               |                                                                                                                                                                                                                                                                                                                                                                                                                                                                                                                                                                                                                                                                                                                                                                                                                                                                                                                                                                                                                                                                                                                                                                                                                                                                                                                                                                                                                                                                                                                                                                                                                                                                                                                                                                                                                                                                                                                                                                                                                                                                                                                                                                                                                                                                                                                  |
|-------------------------------|------------------------------------------------------------------------------------------------------------------------------------------------------------------------------------------------------------------------------------------------------------------------------------------------------------------------------------------------------------------------------------------------------------------------------------------------------------------------------------------------------------------------------------------------------------------------------------------------------------------------------------------------------------------------------------------------------------------------------------------------------------------------------------------------------------------------------------------------------------------------------------------------------------------------------------------------------------------------------------------------------------------------------------------------------------------------------------------------------------------------------------------------------------------------------------------------------------------------------------------------------------------------------------------------------------------------------------------------------------------------------------------------------------------------------------------------------------------------------------------------------------------------------------------------------------------------------------------------------------------------------------------------------------------------------------------------------------------------------------------------------------------------------------------------------------------------------------------------------------------------------------------------------------------------------------------------------------------------------------------------------------------------------------------------------------------------------------------------------------------------------------------------------------------------------------------------------------------------------------------------------------------------------------------------------------------|
| Journal:                      | <i>BMJ Open</i>                                                                                                                                                                                                                                                                                                                                                                                                                                                                                                                                                                                                                                                                                                                                                                                                                                                                                                                                                                                                                                                                                                                                                                                                                                                                                                                                                                                                                                                                                                                                                                                                                                                                                                                                                                                                                                                                                                                                                                                                                                                                                                                                                                                                                                                                                                  |
| Manuscript ID                 | bmjopen-2020-044606.R2                                                                                                                                                                                                                                                                                                                                                                                                                                                                                                                                                                                                                                                                                                                                                                                                                                                                                                                                                                                                                                                                                                                                                                                                                                                                                                                                                                                                                                                                                                                                                                                                                                                                                                                                                                                                                                                                                                                                                                                                                                                                                                                                                                                                                                                                                           |
| Article Type:                 | Original research                                                                                                                                                                                                                                                                                                                                                                                                                                                                                                                                                                                                                                                                                                                                                                                                                                                                                                                                                                                                                                                                                                                                                                                                                                                                                                                                                                                                                                                                                                                                                                                                                                                                                                                                                                                                                                                                                                                                                                                                                                                                                                                                                                                                                                                                                                |
| Date Submitted by the Author: | 27-Jan-2021                                                                                                                                                                                                                                                                                                                                                                                                                                                                                                                                                                                                                                                                                                                                                                                                                                                                                                                                                                                                                                                                                                                                                                                                                                                                                                                                                                                                                                                                                                                                                                                                                                                                                                                                                                                                                                                                                                                                                                                                                                                                                                                                                                                                                                                                                                      |
| Complete List of Authors:     | <p>Alene, Kefyalew; Curtin University, Faculty of Health Sciences; Telethon Kids Institute, Wesfarmers Centre of Vaccines and Infectious Diseases<br/> Assefa, Yalemzewod; University of Gondar; University of New South Wales, School of Women's and Children's Health<br/> Fetene, Dagnachew ; Burnet Institute<br/> Koye, Digsu ; The University of Melbourne School of Population and Global Health<br/> Melaku, Yohannes Adama; Flinders University, Public Health; The University of Adelaide Adelaide Medical School<br/> Gesesew, Hailay; Mekelle University, Epidemiology Department, School of Health Sciences; Flinders University<br/> Birhanu, Mulugeta ; St Paul's Hospital Millennium Medical College<br/> Adane, Akilew; Telethon Kids Institute<br/> Muluneh, Muluken; Western Sydney University; Amref Health Africa in Ethiopia, Monitoring Evaluation and Research<br/> Dachew, Berihun; University of Gondar, Institute of Public Health; Curtin University, School of Public Health<br/> Abrha, Solomon; University of Canberra; Mekelle University, School of Pharmacy<br/> Aregay, Atsed; Monash University; Mekelle University, School of Nursing<br/> Ayele, Asnakew ; University of Gondar, School of Pharmacy; University of New England<br/> Bezabhe, Woldesellassie; University of Tasmania Faculty of Health<br/> Tadesse, Kidane ; Queensland University of Technology; Mekelle University, School of Public Health<br/> Gebremedhin, Tesfaye; University of Canberra<br/> Tesfay, Amanuel; Telethon Kids Institute, Wesfarmers Centre of Vaccines and Infectious Diseases; Curtin University, School of Public health<br/> Gebremichael, Lemlem; Mekelle University, Pharmacology Department; University of South Australia, School of Pharmacy and Medical Sciences, Therapeutics Research Centre<br/> Geleto, Ayele; Haramaya University; The University of Newcastle Faculty of Health and Medicine<br/> Kassahun, Habtamu ; Griffith University, Australian Rivers Institute<br/> Kibret, Getiye ; Debre Markos University, Public Health; The University of Sydney<br/> Leshargie, Cheru; Debre Markos University College of Health Science; University of Technology Sydney<br/> Mekonnen, Alemayehu; Deakin University; The University of Sydney, School of Pharmacy</p> |



|                                                    |                                                                                                                                                                                                                                                                                                                                                                                                                                                                                                                                                                                                                                                                                                                                                                             |
|----------------------------------------------------|-----------------------------------------------------------------------------------------------------------------------------------------------------------------------------------------------------------------------------------------------------------------------------------------------------------------------------------------------------------------------------------------------------------------------------------------------------------------------------------------------------------------------------------------------------------------------------------------------------------------------------------------------------------------------------------------------------------------------------------------------------------------------------|
|                                                    | Mirkuzie, Alemnesh; Ethiopian Public Health Institute; University of Washington, Institute for Health Metrics and Evaluation<br>Mohammed, Hassen; The University of Adelaide; Women's and Children's Health Network<br>Tegegn, Henok; University of New England; University of Gondar<br>Gebresilassie, A; Mekelle University, Epidemiology; University of New South Wales, The George Institute for Global Health<br>Tesfay, Fisaha; Flinders University Faculty of Medicine Nursing and Health Sciences, South gate institute for Health, Society and Equity ;<br>Mekelle University College of Health Sciences, School of Public Health<br>Wubishet, Befikadu ; University of Canberra<br>Kinfu, Yohannes; University of Canberra; Qatar University, College of Medicine |
| <b>&lt;b&gt;Primary Subject Heading&lt;/b&gt;:</b> | Epidemiology                                                                                                                                                                                                                                                                                                                                                                                                                                                                                                                                                                                                                                                                                                                                                                |
| Secondary Subject Heading:                         | Public health, Infectious diseases                                                                                                                                                                                                                                                                                                                                                                                                                                                                                                                                                                                                                                                                                                                                          |
| Keywords:                                          | Epidemiology < TROPICAL MEDICINE, Public health < INFECTIOUS DISEASES, PUBLIC HEALTH                                                                                                                                                                                                                                                                                                                                                                                                                                                                                                                                                                                                                                                                                        |
|                                                    |                                                                                                                                                                                                                                                                                                                                                                                                                                                                                                                                                                                                                                                                                                                                                                             |

SCHOLARONE™  
Manuscripts



I, the Submitting Author has the right to grant and does grant on behalf of all authors of the Work (as defined in the below author licence), an exclusive licence and/or a non-exclusive licence for contributions from authors who are: i) UK Crown employees; ii) where BMJ has agreed a CC-BY licence shall apply, and/or iii) in accordance with the terms applicable for US Federal Government officers or employees acting as part of their official duties; on a worldwide, perpetual, irrevocable, royalty-free basis to BMJ Publishing Group Ltd ("BMJ") its licensees and where the relevant Journal is co-owned by BMJ to the co-owners of the Journal, to publish the Work in this journal and any other BMJ products and to exploit all rights, as set out in our [licence](#).

The Submitting Author accepts and understands that any supply made under these terms is made by BMJ to the Submitting Author unless you are acting as an employee on behalf of your employer or a postgraduate student of an affiliated institution which is paying any applicable article publishing charge ("APC") for Open Access articles. Where the Submitting Author wishes to make the Work available on an Open Access basis (and intends to pay the relevant APC), the terms of reuse of such Open Access shall be governed by a Creative Commons licence – details of these licences and which [Creative Commons](#) licence will apply to this Work are set out in our licence referred to above.

Other than as permitted in any relevant BMJ Author's Self Archiving Policies, I confirm this Work has not been accepted for publication elsewhere, is not being considered for publication elsewhere and does not duplicate material already published. I confirm all authors consent to publication of this Work and authorise the granting of this licence.

## 1 COVID-19 in Ethiopia: A geospatial analysis of vulnerability to infection, 2 case severity, and death

3 Kefyalew Addis Alene<sup>1,2,3\*</sup>, Yalemzewod Assefa Gelaw<sup>3,4+</sup>, Dagnachew Muluye Fetene<sup>5</sup>, Digsu N  
4 Koye<sup>6</sup>, Yohannes Adama Melaku<sup>7,8</sup>, Hailay Abrha Gesesew<sup>9,10</sup>, Mulugeta Molla Birhanu<sup>11</sup>, Akilew  
5 Awoke Adane<sup>12</sup>, Muluken Dessalegn Muluneh<sup>13,14</sup>, Berihun Assefa Dachew<sup>3,15</sup>, Solomon Abrha<sup>16,17</sup>,  
6 Atsedo Aregay<sup>18,19</sup>, Asnakew Achaw Ayele<sup>20,21</sup>, Woldesellassie M Bezabhe<sup>22</sup>, Kidane Tadesse  
7 Gebremariam<sup>23,24</sup>, Tesfaye Gebremedhin<sup>25</sup>, Amanuel Tesfay<sup>15,2</sup>, Lemlem Gebremedhin  
8 Gebremichael<sup>26,27</sup>, Ayele Geleto<sup>28,29</sup>, Habtamu Tilahun Kassahun<sup>30</sup>, Getiye Dejenu Kibret<sup>31,32</sup>, Cheru  
9 Tesema Leshargie<sup>33,34</sup>, Alemayehu Mekonnen<sup>35,36</sup>, Alemnesh H. Mirkuzie<sup>37,38,39</sup>, Hassen  
10 Mohammed<sup>40,41</sup>, Henok Getachew Tegegn<sup>21,42</sup>, Azeb Gebresilassie Tesema<sup>22,43</sup>, Fisaha Tesfay<sup>9,10,44</sup>,  
11 Befikadu L. Wubishet<sup>45</sup>, Yohannes Kinfu<sup>38,46,47,48+</sup>

13 <sup>1</sup>Faculty of Health Sciences, Curtin University, Western Australia, Australia

14 <sup>2</sup>Wesfarmers Centre of Vaccines and Infectious Diseases, Telethon Kids Institute, Perth, Western  
15 Australia, Australia

16 <sup>3</sup>Institute of Public Health, University of Gondar, Gondar, Ethiopia

17 <sup>4</sup>Population Child Health Research Group, School of Women's and Children's Health, University of  
18 New South Wales, Australia

19 <sup>5</sup>Burnet Institute, Melbourne, Victoria, Australia

20 <sup>6</sup>Centre for Epidemiology and Biostatistics, Melbourne School of Population and Global Health,  
21 University of Melbourne, Australia

22 <sup>7</sup>Adelaide Institute for Sleep Health, College of Medicine and Public health, Flinders University,  
23 Australia

24 <sup>8</sup>Adelaide Medical School, University of Adelaide, Australia

25 <sup>9</sup>College of Medicine and Public Health, Flinders University, Australia

26 <sup>10</sup>Epidemiology Department, School of Health Sciences, Mekelle University, Ethiopia

27 <sup>11</sup>Department of nursing, St. Paul's Hospital Millennium Medical College, Addis Ababa, Ethiopia

28 <sup>12</sup>Telethon Kids Institute, The University of Western Australia, Nedlands, Western  
29 Australia, Australia

30 <sup>13</sup>Amref Health Africa in Ethiopian, Monitoring Evaluation and Research, Addis Ababa, Ethiopia

31 <sup>14</sup>School of Nursing and Midwifery, Western Sydney University, Sydney Australia

32 <sup>15</sup>School of Public health, Curtin University, Western Australia, Australia

33 <sup>16</sup>Faculty of Health, University of Canberra, Bruce, Canberra, Australian Capital Territory, Australia.

34 <sup>17</sup>Department of Pharmaceutics, School of Pharmacy, College of Health Sciences, Mekelle University,  
35 Mekelle, Ethiopia

36 <sup>18</sup>School of Nursing and Midwifery, Monash University, Melbourne, Australia

37 <sup>19</sup>School of Nursing, Mekelle University, Ethiopia

38 <sup>20</sup>School of Health, Faculty of Medicine and Health, University of New England, Armidale 2351,  
39 Australia

40 <sup>21</sup>Department of Clinical Pharmacy, School of Pharmacy, College of Medicine and Health Science,  
41 University of Gondar, Gondar, Ethiopia

42 <sup>22</sup>School of pharmacy and pharmacology, University of Tasmania

43 <sup>23</sup>School of Exercise and Nutrition Sciences, Queensland University of Technology, Australia

44 <sup>24</sup>School of Public Health, Mekelle University, Ethiopia

45 <sup>25</sup>Faculty of Business, Government and Law, University of Canberra

46 <sup>26</sup>School of Pharmacy and Medical Sciences, Therapeutics Research Centre, University of South  
47 Australia, Adelaide, Australia

48 <sup>27</sup>School of Pharmacy, Pharmacology Department, Mekelle University, Mekelle, Ethiopia

49 <sup>28</sup>School of Public Health, College of Health and Medical Sciences, Haramaya University, Ethiopia

- 1  
2  
3 50 <sup>29</sup>School of Medicine and Public Health, Faculty of Health and Medicine, the University of  
4 51 Newcastle, Australia  
5 52 <sup>30</sup>Australian Rivers Institute, Griffith University, Nathan, Australia  
6  
7 53 <sup>31</sup>Debre Markos University, Ethiopia  
8 54 <sup>32</sup>University of Sydney, Australia  
9 55 <sup>33</sup>School of Public Health, Faculty of Health, University of Technology Sydney, Ultimo, Australia  
10 56 <sup>34</sup>College of Health Sciences, Debre Markos University, Debre Markos, Ethiopia  
11 57 <sup>35</sup>Institute for Health Transformation, Deakin University, Australia,  
12 58 <sup>36</sup>School of Pharmacy, University of Sydney, Sydney, Australia  
13 59 <sup>37</sup>Ethiopian Public Health Institute, Addis Ababa, Ethiopia  
14 60 <sup>38</sup>Institute for Health Metrics and Evaluation, University of Washington, Seattle, USA  
15 61 <sup>49</sup>Center for International Health, University of Bergen, Bergen, Norway  
16 62 <sup>40</sup>Vaccinology and Immunology Research Trials Unit, Women's and Children's Health Network,  
17 63 Adelaide, South Australia, Australia  
18 64 <sup>41</sup>Robinson Research Institute, University of Adelaide, Adelaide, South Australia, Australia  
19 65 <sup>42</sup>School of Rural Medicine, University of New England, Armidale, Australia  
20 66 <sup>43</sup>The George Institute for Global Health, University of New South Wales, Australia, Sydney  
21 67 <sup>44</sup>School of Health and Social Development, Deakin University  
22 68 <sup>45</sup>Research Centre for Generational Health and Ageing, University of Newcastle, Australia  
23 69 <sup>46</sup>Faculty of Health, University of Canberra, Australia  
24 70 <sup>47</sup>College of Medicine, Qatar University, Qatar  
25 71 <sup>48</sup>Murdoch Children's Research Institute, Royal Children's Hospital, Melbourne, Australia  
26  
27  
28  
29

30 73 **\*Corresponding Author:** Kefyalew Addis Alene, Faculty of Health Sciences, Curtin  
31 74 University, Western Australia, Australia, Kent St, Bentley WA 6102, Australia. Tel:  
32 75 +61404705064; E-mail: [kefyalew.alene@curtin.edu.au](mailto:kefyalew.alene@curtin.edu.au)  
33  
34

35 76

36  
37 77 <sup>+</sup>Equal contributor  
38 78  
39  
40 79  
41  
42 80  
43  
44 81  
45  
46 82  
47  
48 83  
49  
50 84  
51  
52  
53

54 85 **Keywords:** Risk map, vulnerability, infection, severity, death, COVID-19, Ethiopia, geospatial  
55  
56  
57 86  
58  
59 87  
60

1  
2  
3 88 **Abstract**  
4  
5

6 89 **Background:** COVID-19 has caused a global public health crisis affecting most countries,  
7  
8 90 including Ethiopia, in various ways. This study maps the vulnerability to infection, case  
9  
10 91 severity, and likelihood of death from COVID-19 in Ethiopia.  
11

12  
13 92 **Methods:** Thirty-eight potential indicators of vulnerability to COVID-19 infection, case  
14  
15 93 severity and likelihood of death, identified based on a literature review and the availability of  
16  
17 94 nationally representative data at a low geographic scale, were assembled from multiple sources  
18  
19 95 for geospatial analysis. Geospatial analysis techniques were applied to produce maps showing  
20  
21 96 the vulnerability to infection, case severity, and likelihood of death in Ethiopia at a spatial  
22  
23 97 resolution of 1 km X 1 km.  
24

25 98 **Results:** This study showed that vulnerability to COVID-19 infection is likely to be high  
26  
27 99 across most parts of Ethiopia, particularly in the Somali, Afar, Amhara, Oromia, and Tigray  
28  
29 100 regions. The number of severe cases of COVID-19 infection requiring hospitalisation and  
30  
31 101 intensive care unit admission is likely to be high across Amhara, most parts of Oromia and  
32  
33 102 some parts of the Southern Nations, Nationalities, and Peoples' Region. The risk of COVID-  
34  
35 103 19-related death is high in the country's border regions, where public health preparedness for  
36  
37 104 responding to COVID-19 is limited.  
38

39 105 **Conclusion:** This study revealed geographical differences in vulnerability to infection, case  
40  
41 106 severity, and likelihood of death from COVID-19 in Ethiopia. The study offers maps that can  
42  
43 107 guide the targeted interventions necessary to contain the spread of COVID-19 in Ethiopia.  
44  
45 108  
46  
47 109  
48  
49 110  
50  
51 111  
52  
53 112  
54  
55 113  
56  
57  
58  
59  
60

1  
2  
3 114  
4  
5**Strengths and limitations of this study**

- This is the first study that maps vulnerability to COVID-19 infection, severe cases, and associated death in Ethiopia at a high level of resolution across the entire territory of Ethiopia.
- This is also the first study that has attempted to present the degree of service preparedness for COVID-19 across the country.
- The study incorporated a wide range of indicators from multiple sources and applied rigorous geospatial techniques to provide the best possible prediction maps.
- However, some important indicators such as psychosocial and clinical factors were not captured in our modelling due to the lack of geocoded data.

6  
7  
8  
9  
10  
11  
12  
13  
14  
15  
16  
17  
18  
19  
20  
21  
22  
23 115  
24  
25  
26 116  
27  
28  
29 117  
30  
31  
32 118  
33  
34  
35 119  
36  
37  
38 120  
39  
40  
41 121  
42  
43  
44 122  
45  
46  
47 123  
48  
49  
50 124  
51  
52  
53 125  
54  
55  
56 126  
57  
58  
59 127  
60

## 128 **Introduction**

129 Coronavirus disease (COVID-19) has become one of the most serious global public health  
130 crises in modern times <sup>1</sup>. The disease was declared a pandemic on 11 March 2020 and has  
131 currently affected more than 216 countries and territories <sup>2</sup>. As of 3 August 2020, there were  
132 more than 17.6 million confirmed COVID-19 cases and over 680,000 associated deaths around  
133 the globe <sup>3</sup>. The highest numbers of cases and deaths have been reported from the USA, Brazil,  
134 India, and some European countries, such as Russia, the United Kingdom, Italy, and Spain <sup>3</sup>.  
135 African countries, including Ethiopia, have reported a low number of COVID-19, although the  
136 number of cases and deaths are currently on the rise <sup>4</sup>. In Ethiopia, the first case of COVID-19  
137 was reported on 13 March 2020 in Addis Ababa, but at the time of this study almost all regions  
138 of the country were affected by COVID-19 at different magnitudes <sup>5</sup>. However, the number of  
139 cases in Ethiopia is still very low due to limited testing capacity and delays in reporting  
140 confirmed cases.

141 Multiple factors, such as socio-demographic, connectivity, behavioural, climatic, and  
142 comorbidity factors, are strong predictors of the differences in transmission, hospitalisation,  
143 and mortality rates among and within countries <sup>6,7</sup>. Studies conducted in Africa have provided  
144 limited information on the vulnerability of different areas to COVID-19 infection <sup>4,8</sup>. These  
145 studies have been conducted at the country level using a limited number of indicators <sup>4,8</sup>.  
146 Mapping the risks of COVID-19 (infection, case severity, service preparedness and death) at  
147 the lowest administrative unit, such as the district is important in many ways. First, the  
148 generated evidence can help the government and community better prepare and respond to the  
149 health- and non-health-related impacts of COVID-19 according to their contextual  
150 circumstances. Second, it can help the relevant bodies determine effective and efficient  
151 resource-mobilisation efforts, such as providing training for health care workers, supplying  
152 hospitals with necessary equipment, prioritising testing practices, and distributing hand  
153 sanitizer and protective facemasks. Third, the information can be utilised as a guide for  
154 designing targeted travel restrictions or applying full or partial lockdowns as needed. Fourth,  
155 the evidence can stimulate further study on COVID-19 in the country.

156 Given Ethiopia's large population size, variation in resources and vast geographic size, the risk  
157 of COVID-19 infection, case severity and likelihood of death are likely to differ across regions,  
158 zones, and districts, suggesting that local and context-specific interventions be implemented.

1  
2  
3 159 Therefore, this study aimed to map the vulnerability to infection, case severity, and likelihood  
4 160 of death from COVID-19 in Ethiopia using rigorous state-of-the-art geospatial techniques.

## 161 **Methods**

### 162 **Study area**

163 This study focused on Ethiopia, the second-most populous country in Africa, with an estimated  
164 population size of more than 115 million <sup>9</sup>. Ethiopia has a total area of approximately 1.1  
165 million square kilometres, making it the 10<sup>th</sup> largest country in Africa and the 27<sup>th</sup> largest in  
166 the world. The country has a tiered administrative system consisting of regional states (first  
167 level), zones (second level), woredas or districts (third level), and kebeles or neighbourhoods  
168 (fourth level) <sup>10</sup>. There are nine administrative regional states in Ethiopia, including Tigray,  
169 Afar, Amhara, Oromia, Somali, Benishangul-Gumuz, Harari, Gambella, and the Southern  
170 Nations, Nationalities, and Peoples' Region (SNNPR), and two administrative cities (Addis  
171 Ababa and Diredawa). Four of these regional states (namely, Afar, Somali, Benishangul-  
172 Gumuz, and Gambella) are relatively less developed, and categorised as developing regional  
173 states. They lag behind the rest of the country in all indicators related to human development  
174 and disease prevention and control programs. The administrative units of Ethiopia (shapefiles)  
175 were obtained from the Database for Global Administrative Areas <sup>11</sup>.

### 176 **Data sources and variable selection**

177 The data for this study were assembled from multiple sources (Table 1). Potential indicators  
178 were selected based on evidence of association with COVID-19 infection, case severity, and  
179 death based on a literature review and the availability of country-wide representative data at a  
180 district geographic scale or lower (Figure 1). Table 2 presents the evidence for the association  
181 between indicators and COVID-19, as well as the rationale for selecting these indicators for  
182 the study.

183 The following area-level demographic and socio-economic indicators were used as indicators  
184 of COVID-19 infection and case severity: the average number of persons per household, the  
185 proportion of the population aged  $\geq 65$  years, the proportion of males, and the number of  
186 households in the lowest wealth quintile. All of these socio-economic and demographic  
187 indicators were obtained from the latest Ethiopia Demographic and Health Survey (EDHS) <sup>12</sup>.  
188 A map showing the distribution of EDHS datapoints are available as supplementary  
189 information (Supplemental Figure 1). Population density, estimated as the number of people  
190 per grid, was obtained from WorldPop <sup>13</sup>.



1  
2  
3 191 Connectivity indicators, which measure the population-level vulnerability to infection, were  
4  
5 192 also captured using distance and time-bounded markers. Specifically, average travel time  
6  
7 193 (measured in minutes) to the nearest city and proximity to international borders (measured in  
8  
9 194 kilometres) were included to measure each area's level of susceptibility to infection. Data on  
10  
11 195 travel time to the nearest city, obtained from the University of Oxford's Malaria Atlas Project  
12  
13 196 (MAP), were used to quantify the accessibility of an area to high-density urban centres at a  
14  
15 197 resolution of 1 km×1 km<sup>14</sup>. Data on proximity to international borders were obtained from the  
16  
17 198 EDHS spatial data repository and were used to measure<sup>15</sup> the geodesic distance to the nearest  
18  
19 199 international border in kilometres, indicating the risk of cross-border transmission and the  
20  
21 200 spread of COVID-19. Infection rates and the spread of COVID-19 were also positively  
22  
23 201 correlated with the per capita public transportation use rate<sup>16</sup>. Thus, to determine the nearest  
24  
25 202 cross-country road to each location on the map, we obtained and applied data for major roads  
26  
27 203 from the World Bank<sup>17</sup>.

28  
29 204 It is evident that inadequate knowledge about COVID-19 and a lack of awareness of prevention  
30  
31 205 measures exacerbate community transmission of the disease<sup>18</sup>. Therefore, we extracted data  
32  
33 206 on adult literacy rate, access to media (such as radio, television, and mobile phone messages)  
34  
35 207 and knowledge about other infectious diseases (e.g., HIV) from the EDHS as proxies for  
36  
37 208 knowledge of COVID-19 prevention measures in each area of the country<sup>12</sup>. According to the  
38  
39 209 WHO, maintaining good hand hygiene through regular washing with soap and water is one of  
40  
41 210 the most effective preventative measures for reducing the transmission of COVID-19<sup>19,20</sup>.  
42  
43 211 Using the same data as above, we also assessed hand hygiene practices, access to water, and  
44  
45 212 the availability of handwashing stations in a household.

46  
47 213 Previous studies have shown that underlying chronic comorbidities and behavioural factors  
48  
49 214 such as cigarette, alcohol and khat consumption were associated with more severe COVID-19  
50  
51 215 infections<sup>21,22</sup>. Data on khat chewing and the alcohol consumption rate were obtained from the  
52  
53 216 EDHS 2016<sup>12</sup>, and data on cigarette smoking were obtained from the Ethiopia Public Health  
54  
55 217 Institute STEP wise approach to Surveillance (STEPS) study<sup>23</sup>. The STEPS survey was also  
56  
57 218 used to measure the prevalence of selected non-communicable diseases (NCDs) such as  
58  
59 219 hypertension, heart disease, and diabetes mellitus (DM).

60  
220 The level of preparedness and readiness of health facilities to detect, manage, and control the  
221  
222 COVID-19 pandemic at a given location was measured using data from the Service Availability  
and Readiness Assessment (SARA) survey<sup>24</sup>. For each geo-location, the obtained measures

223 include the availability and readiness of facilities in terms of basic amenities and equipment,  
224 standard precautions, diagnostic capacities, and essential medicines. In addition, data on  
225 service readiness for specific diseases such as DM, chronic respiratory disease (CRD), and  
226 tuberculosis (TB), as well as the availability of intensive care units (ICUs) and laboratory  
227 facilities, were obtained from this same survey. To augment the health facility data, we  
228 extracted population-level indicators on health care access and barriers to care from EDHS  
229 2016<sup>12</sup>.

230 Finally, climatic data (temperature, precipitation, humidity, and sunlight exposure) were  
231 obtained from the WorldClim v2.0 Global Climate Database<sup>25</sup>. These data were extracted at a  
232 spatial resolution of 30 seconds or ~1 km<sup>2</sup> and were considered indicators of COVID-19  
233 infection in this study.

### 234 **Geospatial data processing**

235 All data were georeferenced using a geographical information system, ArcGIS 10.6.1 software  
236 (ESRI Inc., Redlands CA, USA). The ideal resolution for spatial analysis was a latitude and  
237 longitude point that represented the location of the data cluster (point-level data), but when  
238 these were not available, we geolocated the available data to the smallest geographical areal  
239 unit, typically representing an administrative unit such as village or districts. In instances when  
240 the latitude and longitude coordinates of the village or district were not available in the dataset,  
241 centroids of the village or districts were also identified using Google Maps. A very small  
242 rectangular polygon (fishnet) with its centroid (fishnet centroid) covering the whole territory  
243 of Ethiopia was created using a sampling tool under the data management tools in the  
244 ArcToolbox (Figure 2). The fishnet centroid contained a unique identification number and was  
245 used as a common georeferenced system to process, join, and extract the raster and vector data  
246 collected from various sources. All vector data (point, polygon, and line) were converted to  
247 raster data using geostatistical methods<sup>26</sup>. Raster grids were then resampled to the common  
248 georeferenced system at a spatial resolution of 1 km x 1 km. Finally, a raster mask covering  
249 the entire country was created by clipping smaller spatial units from a large global raster data  
250 source.

### 251 **Statistical analyses**

252 Geostatistical techniques such as spatial autocorrelation, kriging and semivariograms were  
253 applied to create a prediction grid surface from a scattered set of points<sup>27</sup>. Kriging assumes  
254 that the distance or direction between sample points reflects a spatial correlation that can be  
255 used to explain variation in the surface<sup>28</sup>. Since the variables had different units of

1  
2  
3 256 measurement, the datasets were normalised using a min-max approach to a standard scale  
4  
5 257 ranging from 0 (the lowest risk) to 100 (the highest risk)<sup>29</sup>. After normalisation, the indicators  
6  
7 258 were averaged to create a vulnerability index, measuring the risk of COVID-19 for each geo-  
8  
9 259 location<sup>30</sup>. The vulnerability indices were calculated separately for each domain, namely, the  
10  
11 260 vulnerability to infection, case severity, and likelihood of death from COVID-19. The three  
12  
13 261 domains were then averaged to produce the overall COVID-19 vulnerability index. Given that  
14  
15 262 COVID-19 is a new virus, there is a lack of evidence for assigning weights for each indicator.  
16  
17 263 Hence, equal weight was given to all indicators when calculating the arithmetic mean for the  
18  
19 264 vulnerability indices. However, we also used principal component analysis (PCA) and  
20  
21 265 geometric mean methods, which produced broadly similar results (Supplemental Figure 2 and  
22  
23 266 Supplemental Figure 3). The risk maps were then created separately for infection, case severity,  
24  
25 267 service preparedness, and death from the composite index using geostatistical tools in ArcGIS.  
26  
27 268 All data transformations were performed in R<sup>31</sup>. All items included in this study are available  
28  
29 269 in the STROBE (Strengthening the Reporting of Observational Studies in Epidemiology)  
30  
31 270 Statement checklist (Supplemental Table 1).

32  
33 271 **Ethics aspects:** Ethical approval was not required for this study as it was based on publicly  
34  
35 272 available data.

36  
37 273 **Patient and public involvement:** This research was done without patient and public  
38  
39 274 involvement.

40  
41 275 **Funding:** There was no funding source for this study.

## 42 276 **Results**

### 43 277 **Vulnerability to COVID-19 infection**

44  
45 278 Figure 3 shows the vulnerability map of COVID-19 infection in Ethiopia. The map highlights  
46  
47 279 that most parts of the country are likely to have a relatively high vulnerability and be at  
48  
49 280 substantial risk for COVID-19 infection. Most parts of the country are identified as vulnerable  
50  
51 281 to COVID-19 infection, with the exception of Addis Ababa and the north-western Somali  
52  
53 282 region. The peripheral areas of the country bordering Djibouti, Somalia, Eritrea, and South  
54  
55 283 Sudan appeared to be vulnerable to COVID-19 infection. These outlying areas are  
56  
57 284 characterised by a low level of geographical connectivity and low scores for disease  
58  
59 285 knowledge, hand hygiene and socio-economic indices (Supplemental Figure 4). They also have  
60  
286 certain climatic factors that were found to be important indicators of COVID-19 transmission.

## 287 **Vulnerability to severe cases of COVID-19 infection**

288 Areas across the Amhara region and most parts of the Oromia region are likely to experience  
289 severe forms of COVID-19 that require hospitalisation and ICU admission. Some parts of the  
290 SNNPR are also expected to be at high risk of severe COVID-19 infections. The combination  
291 of demographic (high proportion of older adults), comorbidity (high prevalence of  
292 hypertension, DM, obesity, HIV, and TB), and behavioural and economic indicators (high  
293 proportion of smokers and high level of alcohol and khat consumption, interior cooking, and  
294 solid fuel use) renders these parts of the country at a higher risk of severe forms of COVID-19.  
295 Figure 4 shows the levels of vulnerability to severe forms of COVID-19.

## 296 **Vulnerability to death from COVID-19**

297 People living around border areas in Ethiopia are at a high risk for COVID-19-related death,  
298 as illustrated in Figure 5. Districts and zones in the Benishangul-Gumuz, Gambela, Afar,  
299 SNNPR, Dire Dawa, Southwest Somali, Northwest Amhara, Western Tigray, and Western and  
300 Eastern Oromia regions are at high risk for COVID-19-related death. The level of service  
301 preparedness and readiness to mitigate the health effects of COVID-19 appear to be very low  
302 in these regions (Figure 6). Ethiopia's border regions have inadequate ICU availability and  
303 laboratory capacity as well as limited health care access. They also have low general and  
304 service-specific readiness, as shown in Figure 6.

## 305 **Discussion**

306 This is the first study that maps vulnerability to COVID-19 infection, severe cases, and  
307 associated death in Ethiopia at a high resolution. This is also the first study that has attempted  
308 to present the degree of service preparedness for COVID-19 across the country.

309 We found that most parts of the country are vulnerable to COVID-19 infections, and the  
310 greatest burden might be outside of Addis Ababa. It is likely that compared to other regions, a  
311 higher proportion of people from the Amhara and Oromia regions, the two most populous  
312 regions of the country, will develop severe forms of COVID-19 leading to hospitalisation and  
313 ICU admission. Border areas of the country are also expected to face a higher risk of death than  
314 areas located in the central regions. The findings of this study are of paramount importance in  
315 preventing and controlling COVID-19 transmission and in designing targeted interventions,  
316 such as enacting travel restrictions, distributing preventative masks and determining which  
317 areas to prioritise if a COVID-19 vaccine becomes available. As some of these areas also have  
318 lower preparedness scores and low general and service-specific readiness scores, the findings

1  
2  
3 319 have wider implications for allocating resources and strengthening the health care system after  
4 320 the COVID-19 pandemic.

7 321 Despite the disproportionately high infection rate in Addis Ababa at present (Supplemental  
8 322 Figure 5), we found that the risk of COVID-19 infection is likely to become rather high in other  
9 323 regions. The high infection rate in Addis Ababa at this initial stage is expected, given that Addis  
10 324 Ababa is a major travel hub and Bole International Airport, located in the city, is one of the  
11 325 largest international airports in Africa. This exposes the city to a higher risk of imported cases  
12 326 and, subsequently, to an early surge of infections, leaving the areas outside the city at a higher  
13 327 risk of later infection. Second, we considered multifaceted risk factors (indicators) for COVID-  
14 328 19 infection in our geospatial model. This means that although the city has a high degree of  
15 329 connectivity, it is also characterised by higher scores for information penetration, knowledge  
16 330 of disease prevention and hand hygiene practices that could help slow the rate of infection in  
17 331 the city<sup>12</sup>. Third, Addis Ababa has relatively better and more consistent test-and-contact tracing  
18 332 practices than in other parts of the country, which means that the chance of new infections  
19 333 being detected in the city are much greater than in other parts of the country<sup>5</sup>. Future efforts to  
20 334 expand testing and tracing practices in other areas of the county are likely to increase the extent  
21 335 of confirmed infections in those other areas. Recent studies have demonstrated that effective  
22 336 social distancing and contact tracing can significantly reduce the rate of infection<sup>32,33</sup>. These  
23 337 interventions should be strengthened and expanded to areas identified as high risk in this study.

24 338 Our study also showed that the risk for severe cases of COVID-19 infection is high in most  
25 339 parts of the Amhara and Oromia regions. This may be due to the high prevalence of NCDs,  
26 340 which are associated with severe cases of COVID-19. Previous studies have revealed that the  
27 341 burden of NCDs, such as DM and hypertension, is high in these two regions<sup>23,34,35</sup>.

28 342 Our study also revealed that peripheral areas sharing international borders are likely to see a  
29 343 greater number of COVID-19-related deaths. The high risk of death along the border areas  
30 344 might be attributed to low preparedness in case management and weak health care systems. In  
31 345 contrast, although the Amhara and Oromia regions may have more severe cases, the  
32 346 preparedness indicators show that the regions are better equipped to cope with these anticipated  
33 347 severe cases. However, our study suggests that additional preparation and capacity  
34 348 strengthening are needed mainly in the following areas: emergency response systems, case  
35 349 detection and capacity to care for patients. It is also equally important that hospitals have  
36 350 adequate supplies, health care personnel and life-saving medical intervention resources.

1  
2  
3 351 Despite encouraging efforts by the Ethiopian government and stakeholders to prepare the  
4  
5 352 health care system for the pandemic, the existing health care services in the country may face  
6  
7 353 unprecedented challenges and crises due to the surge of patients that will require hospitalisation  
8  
9 354 and ICU services at the same time. This can, however, be eased by implementing public health  
10  
11 355 and social measures at the individual, community, and public authority levels to prevent  
12  
13 356 infections and subsequent health, economic, and social consequences <sup>36</sup>. Studies have shown  
14  
15 357 that implementing non-pharmaceutical interventions such as physical distancing, mask use, and  
16  
17 358 closure of schools, especially during the early stages of infection, can reduce transmission and  
18  
19 359 subsequent potential public health and economic crises <sup>37</sup>.

20  
21 360 Further, we found notable regional disparities in health system preparedness and readiness  
22  
23 361 levels in the country. This is important because if the health care system is well equipped to  
24  
25 362 prevent and mitigate the spread of the pandemic, then the mortality rate from the disease can  
26  
27 363 be markedly reduced <sup>38</sup>. However, we observed that Ethiopia's border regions (i.e.,  
28  
29 364 Benishangul-Gumuz, Gambella, Afar, and Somali) have low preparedness levels.  
30  
31 365 Nevertheless, comparisons between the border regions and other regions of the country need  
32  
33 366 to be treated with care because Ethiopia in general has very low doctor-to-resident (1 doctor  
34  
35 367 per 10,000 people) and hospital bed-to-population (3 hospital beds per 10,000 people) ratios  
36  
37 368 <sup>39</sup>. Several long-, medium- and short-term strategies, can be implemented to mitigate these  
38  
39 369 problems: (i) providing short-term training for potential actors such as community leaders,  
40  
41 370 students, and traditional and modern medical practitioners, (ii) recruiting additional staff to  
42  
43 371 work in COVID-19-related health care, (iii) establishing COVID-19 clinics and changing  
44  
45 372 outpatient rooms to emergency clinics, (iv) collaborating with private hospitals ahead of surges  
46  
47 373 so that they can be used in the case such surges occur, and (v) establishing mobile clinics and  
48  
49 374 temporary admission rooms in highly vulnerable areas.

### 46 375 **Strength and Limitations**

48 376 This study has several strengths. First, the current study was conducted at a spatial resolution  
49  
50 377 of 1 km x 1 km across the entire territory of Ethiopia. Second, it incorporated a wide range of  
51  
52 378 indicators from multiple sources. Third, it applied rigorous geospatial techniques, including  
53  
54 379 spatial autocorrelation, kriging and semivariograms, to provide the best possible prediction  
55  
56 380 maps. Finally, we produced vulnerability mapping for infection or transmission, case severity,  
57  
58 381 and associated death separately to assist with policy interventions related to each risk.  
59  
60

1  
2  
3 382 However, it is important to note some potential limitations of the study when interpreting the  
4  
5 383 findings. First, the results need constant updating, as some of the variables used in the study  
6  
7 384 may change overtime. Second, the data used in this study were not collected in the same year  
8  
9 385 and the results might be changed if recently available data were used in the analysis. However,  
10  
11 386 many of the variables used in this study were static and may not change over time. Moreover,  
12  
13 387 we used the most recently available data for non-static variables such as EDHS data. Third,  
14  
15 388 ongoing political turmoil in the country means that the dynamics of transmission may change  
16  
17 389 depending on the location and severity of these incidents. For example, in areas of low security  
18  
19 390 resulting from active conflict, the local health systems might be ill-prepared to prevent and  
20  
21 391 control COVID-19. Insecurity also may generate unpredictable population movements, and  
22  
23 392 this in turn could exacerbate infection dynamics in the country. Fourth, the calculation of the  
24  
25 393 composite risk factor index was based on an unweighted average under the assumption that all  
26  
27 394 indicators have equal importance, which may or may not be the case. Some of the variables  
28  
29 395 included in our score may have greater effects on vulnerability to infection, case severity, and  
30  
31 396 likelihood of death than others. Giving equal weight for all these variables may influence the  
32  
33 397 findings of our study, but the exact effect is hard to tell. However, we have calculated a  
34  
35 398 weighted index using PCA as an alternative method, which produced broadly similar results  
36  
37 399 (Supplemental Figure 2 and Supplemental Figure 3). Last, some important indicators, such as  
38  
39 400 psychosocial and clinical factors (e.g., mental illness, quality of life, and social support), were  
40  
41 401 not captured in our modelling due to the lack of geocoded data.

## 402 **Conclusions**

403 Although nearly three-quarters of the current COVID-19 cases reported in Ethiopia are  
404  
405 concentrated in and around Addis Ababa, this study predicts that over time, the risk of COVID-  
406  
407 19 infection will be higher across most other parts of the country. A higher proportion of people  
408  
409 from the Amhara region, most of the Oromia region, and some parts of the SNNPR will develop  
410  
411 severe cases of infection. Additionally, the risk of death will be higher in the regions of the  
412  
413 country with low preparedness scores for COVID response. Hence, the preventative and  
414  
415 control measures that are currently in place in the capital city should be strengthened and  
416  
417 extended to regional areas, especially to high-risk areas, to prevent and mitigate the risk of  
418  
419 COVID-19 infection, lower the number of severe cases, and limit the number of associated  
420  
421 deaths in Ethiopia.

## 414 Declaration

### 415 Authors' contributions

416 KAA, YAG, YK, DMF, DNK, YAM, HAG, MB, MDM, AAA, and BAD conceptualised the  
417 study. KAA designed and run the geospatial analysis. YAG involved in the data analysis. KAA,  
418 YAG, DMF, DNK, and YAM drafted the manuscript. HAG, MB, AAA<sub>1</sub>, MDM, BAD, SA,  
419 AA, AAA<sub>2</sub>, WMB, KTG, TG, ATG, LGG, AG, HTK, GDK, CTL, LBM, AAM, HM, HGT,  
420 AGT, FT, BLW, and YK Critically reviewed and revised the drafted manuscript. KAA, YK,  
421 and AHM were responsible for quality control of accuracy and integrity of data. All the authors  
422 interpreted the data. All authors contributed to the final draft and finally approved it to be  
423 published. All authors agreed to be accountable for all aspects of the work for any issue related  
424 to the accuracy or integrity of any part of the work. The corresponding author attests that all  
425 listed authors meet authorship criteria and that no others meeting the criteria have been omitted.

426 **Funding:** There is no funding source for this study.

427 **Competing interests:** None declared.

428 **Patient and public involvement:** This research was done without patient and public  
429 involvement.

430 **Data availability statement:** Extra data is available by emailing the corresponding author  
431 (KAA): kefyalew.alene@curtin.edu.au

## 432 Figures

433 **Figure 1:** Indicators for the vulnerability of COVID-19 infection, severity, service,  
434 preparedness, and related death. DM: diabetes mellitus, BMI: body mass index, CVD:  
435 cardiovascular disease prevalence; TB: tuberculosis; HIV: Human immunodeficiency virus;  
436 ICU: intensive care unit; CRD: cardiorespiratory diseases

437 **Figure 2:** Rectangular polygon (fishnet), fishnet centroids, and raster mask covering the whole  
438 territory of Ethiopia.

439 **Figure 3.** Vulnerability map to COVID-19 infection in Ethiopia.

440 **Figure 4.** Vulnerability map to COVID-19 severity in Ethiopia.

441 **Figure 5.** Vulnerability map to death from COVID-19 in Ethiopia.

442 **Figure 6.** Vulnerability map to service preparedness for COVID-19 in Ethiopia.



## References

1. Yang P, Wang X. COVID-19: a new challenge for human beings. *Cellular & molecular immunology* 2020; **17**(5): 555-7.
2. Cucinotta D, Vanelli M. WHO declares COVID-19 a pandemic. *Acta bio-medica: Atenei Parmensis* 2020; **91**(1): 157-60.
3. WHO. Coronavirus disease ( COVID-19): situation report, 195. 2020.
4. Gilbert M, Pullano G, Pinotti F, et al. Preparedness and vulnerability of African countries against importations of COVID-19: a modelling study. *The Lancet* 2020; **395**(10227): 871-7.
5. Baye K. COVID-19 prevention measures in Ethiopia: Current realities and prospects: Intl Food Policy Res Inst; 2020.
6. Ji Y, Ma Z, Peppelenbosch MP, Pan Q. Potential association between COVID-19 mortality and health-care resource availability. *The Lancet Global Health* 2020; **8**(4): e480.
7. Mehra MR, Desai SS, Kuy S, Henry TD, Patel AN. Cardiovascular disease, drug therapy, and mortality in COVID-19. *New England Journal of Medicine* 2020.
8. ACSS. Mapping Risk Factors for the Spread of COVID-19 in Africa: Africa Center for Strategic Studies, 2020.
9. UN. Department of Economic and Social Affairs. Population Division, 2019.
10. Workie NW, Ramana GN. The health extension program in Ethiopia. 2013.
11. Areas GA. GADM database of global administrative areas. *Global Administrative Areas* 2012.
12. CSA. Ethiopia Demographic and Health Survey 2016. Addis Ababa, Ethiopia, and Rockville, Maryland, USA, 2016.
13. Tatem AJ. WorldPop, open data for spatial demography. *Scientific data* 2017; **4**(1): 1-4.
14. Weiss DJ, Nelson A, Gibson H, et al. A global map of travel time to cities to assess inequalities in accessibility in 2015. *Nature* 2018; **553**(7688): 333-6.
15. ICF. The DHS Program Spatial Data Repository. 2018.
16. Ayenew B, Yitayew M, Pandey D. Challenges and opportunities to tackle COVID-19 spread in Ethiopia. *Journal of Peer Science* 2020; **2**(2).
17. Bank W. Ethiopia Roads. 2014.
18. Zhong B-L, Luo W, Li H-M, et al. Knowledge, attitudes, and practices towards COVID-19 among Chinese residents during the rapid rise period of the COVID-19 outbreak: a quick online cross-sectional survey. *International journal of biological sciences* 2020; **16**(10): 1745.
19. Anderson RM, Heesterbeek H, Klinkenberg D, Hollingsworth TD. How will country-based mitigation measures influence the course of the COVID-19 epidemic? *The Lancet* 2020; **395**(10228): 931-4.
20. Xiao Y, Torok ME. Taking the right measures to control COVID-19. *The Lancet Infectious Diseases* 2020; **20**(5): 523-4.
21. Testino G. Are patients with alcohol use disorders at increased risk for Covid-19 infection? *Alcohol and Alcoholism (Oxford, Oxfordshire)* 2020.
22. Zheng Z, Peng F, Xu B, et al. Risk factors of critical & mortal COVID-19 cases: A systematic literature review and meta-analysis. *Journal of Infection* 2020.
23. EPHI. Ethiopia STEPS report on risk factors for chronic non-communicable diseases and prevalence of selected NCDS. Addis Ababa, 2016.
24. EPHI. Ethiopia Service Availability and Readiness Assessment (SARA) Final Report. . Addis Ababa, 2018.
25. Fick SE, Hijmans RJ. WorldClim 2: new 1-km spatial resolution climate surfaces for global land areas. *International journal of climatology* 2017; **37**(12): 4302-15.

- 1  
2  
3 493 26. Burrough P. GIS and geostatistics: Essential partners for spatial analysis.  
4 494 *Environmental and ecological statistics* 2001; **8**(4): 361-77.
- 5 495 27. Childs C. Interpolating surfaces in ArcGIS spatial analyst. *ArcUser*, July-September  
6 496 2004; **3235**(569): 32-5.
- 7 497 28. Negreiros J, Painho M, Aguilar F, Aguilar M. Geographical information systems  
8 498 principles of ordinary kriging interpolator. *Journal of Applied Sciences* 2010; **10**(11): 852-67.
- 9 499 29. Patro S, Sahu KK. Normalization: A preprocessing stage. *arXiv preprint*  
10 500 *arXiv:150306462* 2015.
- 11 501 30. Moore M, Gelfeld B, Okunogbe A, Christopher P. Identifying future disease hot  
12 502 spots: infectious disease vulnerability index: Rand Corporation; 2016.
- 13 503 31. Team RC. R: A language and environment for statistical computing [Internet]. Vienna  
14 504 (Austria): R Foundation for Statistical Computing [cited 2019 Aug 8]. 2020.
- 15 505 32. Siraj DS, Siraj AS, Mapes A. Early estimates of COVID-19 infections in small,  
16 506 medium and large population clusters. *medRxiv* 2020.
- 17 507 33. Getaneh Y, Yizengaw A, Adane S, et al. Global lessons and Potential strategies in  
18 508 combating COVID-19 pandemic in Ethiopia: Systematic Review. *medRxiv* 2020.
- 19 509 34. Tesfaye TD, Temesgen WA, Kasa AS, Yismaw YS. Prevalence and associated factors  
20 510 of hypertension in Amhara regional state city and its' surrounding rural districts: a  
21 511 community-based cross-sectional study. *African Health Sciences* 2019; **19**(3): 2580-90.
- 22 512 35. Kibret KT, Mesfin YM. Prevalence of hypertension in Ethiopia: a systematic meta-  
23 513 analysis. *Public Health Reviews* 2015; **36**(1): 1-12.
- 24 514 36. Hartley DM, Perencevich EN. Public health interventions for COVID-19: emerging  
25 515 evidence and implications for an evolving public health crisis. *Jama* 2020; **323**(19): 1908-9.
- 26 516 37. Pan A, Liu L, Wang C, et al. Association of public health interventions with the  
27 517 epidemiology of the COVID-19 outbreak in Wuhan, China. *Jama* 2020; **323**(19): 1915-23.
- 28 518 38. Stafford N. Covid-19: Why Germany's case fatality rate seems so low. *Bmj* 2020;  
29 519 **369**.
- 30 520 39. Organization WH. Density of physicians (total number per 1000 population, latest  
31 521 available year). *Global Health Observatory (GHO) data* 2017.
- 32 522 40. Williamson E, Walker AJ, Bhaskaran KJ, et al. OpenSAFELY: factors associated  
33 523 with COVID-19-related hospital death in the linked electronic health records of 17 million  
34 524 adult NHS patients. *medRxiv* 2020.
- 35 525 41. Ahmadi M, Sharifi A, Dorosti S, Ghouschi SJ, Ghanbari N. Investigation of  
36 526 effective climatology parameters on COVID-19 outbreak in Iran. *Science of The Total*  
37 527 *Environment* 2020: 138705.
- 38 528 42. Ahmad K, Erqou S, Shah N, et al. Association of Poor Housing Conditions with  
39 529 COVID-19 Incidence and Mortality Across US Counties. *medRxiv* 2020.
- 40 530 43. Ho FK, Celis-Morales CA, Gray SR, et al. Modifiable and non-modifiable risk factors  
41 531 for COVID-19: results from UK Biobank. *medRxiv* 2020.
- 42 532 44. Zheng R, Xu Y, Wang W, Ning G, Bi Y. Spatial transmission of COVID-19 via  
43 533 public and private transportation in China. *Travel Medicine and Infectious Disease* 2020.
- 44 534 45. Chinazzi M, Davis JT, Ajelli M, et al. The effect of travel restrictions on the spread of  
45 535 the 2019 novel coronavirus (COVID-19) outbreak. *Science* 2020; **368**(6489): 395-400.
- 46 536 46. Holtmann M, Jones M, Shah A, Holtmann G. Low ambient temperatures are  
47 537 associated with more rapid spread of COVID-19 in the early phase of the endemic.  
48 538 *Environmental Research* 2020.
- 49 539 47. Sobral MFF, Duarte GB, da Penha Sobral AIG, Marinho MLM, de Souza Melo A.  
50 540 Association between climate variables and global transmission of SARS-CoV-2. *Science of*  
51 541 *The Total Environment* 2020; **729**: 138997.

- 1  
2  
3 542 48. Wang J, Tang K, Feng K, Lv W. High temperature and high humidity reduce the  
4 543 transmission of COVID-19. *Available at SSRN 3551767* 2020.
- 5 544 49. Li J, Zhang L, Ren Z, Xing C, Qiao P, Chang B. Meteorological factors correlate with  
6 545 transmission of 2019-nCoV: Proof of incidence of novel coronavirus pneumonia in Hubei  
7 546 Province, China. *medRxiv* 2020.
- 8 547 50. Basker GV. A review on hazards of khat chewing. *Int J Pharm Pharm Sci* 2013; **5**(3):  
9 548 74-7.
- 10 549 51. Lopes H, McKay V, de Cima P. ADULT LEARNING EDUCATION AS A TOOL  
11 550 TO CONTAIN PANDEMICS: THE COVID-19 EXPERIENCE.
- 12 551 52. Ayedee N, Manocha D. Role of Media (Television) in Creating a Positive  
13 552 Atmosphere in COVID-19 during Lockdown in India. *Role of Media (Television) in Creating*  
14 553 *a Positive Atmosphere in COVID-19 during Lockdown in India (May 19, 2020)* 2020.
- 15 554 53. Wood CS, Thomas MR, Budd J, et al. Taking connected mobile-health diagnostics of  
16 555 infectious diseases to the field. *Nature* 2019; **566**(7745): 467-74.
- 17 556 54. Bertozzi S, Padian NS, Wegbreit J, et al. HIV/AIDS prevention and treatment.  
18 557 *Disease control priorities in developing countries* 2006; **2**: 331-70.
- 19 558 55. WHO. Water, sanitation, hygiene, and waste management for the COVID-19 virus:  
20 559 interim guidance, 23 April 2020: World Health Organization, 2020.
- 21 560 56. WHO. Infection prevention and control guidance for long-term care facilities in the  
22 561 context of COVID-19: interim guidance, 21 March 2020: World Health Organization, 2020.
- 23 562 57. WHO. WHO Releases Guidelines to Help Countries Maintain Essential Health  
24 563 Services During the COVID-19 Pandemic. Geneva, Switzerland: World Health Organization;  
25 564 2020.
- 26 565 58. Murthy S, Gomersall CD, Fowler RA. Care for critically ill patients with COVID-19.  
27 566 *Jama* 2020; **323**(15): 1499-500.
- 28 567 59. Tadolini M, Codecasa LR, García-García J-M, et al. Active tuberculosis, sequelae and  
29 568 COVID-19 co-infection: first cohort of 49 cases. *European Respiratory Journal* 2020.
- 30  
31  
32  
33  
34  
35 569  
36  
37 570  
38  
39 571  
40  
41 572  
42  
43 573  
44  
45 574  
46  
47 575  
48  
49 576  
50  
51 577  
52  
53 578  
54  
55 579  
56  
57 580  
58  
59 581  
60 582

1  
2  
3 583  
4  
5 584  
6  
7 585  
8  
9 586  
10  
11 587  
12  
13 588  
14  
15 589  
16  
17 590  
18  
19 591  
20  
21 592  
22  
23 593  
24  
25 594

## Tables

**Table 1:** Data sources and definitions of indicators for the vulnerability of COVID-19 in Ethiopia.

| Indicators                       | Data sources           | Spatial resolution           | Definitions                                                                                                                  |
|----------------------------------|------------------------|------------------------------|------------------------------------------------------------------------------------------------------------------------------|
| <b>Demographic indicators</b>    |                        |                              |                                                                                                                              |
| Male sex                         | EDHS 2016              | Latitude and longitude point | Total number of male populations divided by the total number of people participated in the survey                            |
| Older age                        | EDHS 2016              | Latitude and longitude point | Total number of people with age $\geq 65$ years divided by the total number of people participated in the survey             |
| <b>Socio-economic indicators</b> |                        |                              |                                                                                                                              |
| Population density               | WorldPop               | 1 km X 1 km                  | Number of people per square kilometre (grid)                                                                                 |
| Number of household members      | EDHS 2016              | Latitude and longitude point | Average number of people living in a house                                                                                   |
| Low wealth index                 | EDHS 2016              | Latitude and longitude point | Number of people with low wealth index (poorer and poorest) divided by the total number of people participated in the survey |
| <b>Connectivity indicators</b>   |                        |                              |                                                                                                                              |
| Travel times to cities           | MAP                    | 1 km $\times$ 1 km           | Travel time in minutes to the nearest city with a population of more than 50,000                                             |
| Proximity to national borders    | DHS Spatial Repository | Latitude and longitude point | The geodesic distance to the nearest international borders                                                                   |
| Distance to major roads          | World Bank             | District                     | Distance in km to cross-country round                                                                                        |
| <b>Climatic indicators</b>       |                        |                              |                                                                                                                              |
| Mean temperature                 | WorldClim              | 1 km $\times$ 1 km           | Annual mean environmental air temperature ( $^{\circ}$ C)                                                                    |
| Mean precipitation               | WorldClim              | 1 km $\times$ 1 km           | Annual mean rainfall (mm)                                                                                                    |

1

2

|                         |           |           |                                                                           |
|-------------------------|-----------|-----------|---------------------------------------------------------------------------|
| 3 Wind speed            | WorldClim | 1 km×1 km | Annual mean wind speed (m s <sup>-1</sup> )                               |
| 4 Solar radiation       | WorldClim | 1 km×1 km | Annual mean solar radiation (kJ m <sup>-2</sup> day <sup>-1</sup> )       |
| 5 Water vapour pressure | WorldClim | 1 km×1 km | Annual mean water vapour pressure (kPa), equivalent to absolute humidity. |

#### 8 Behavioural indicators

|                                 |            |                              |                                                                                                                                                                                                                |
|---------------------------------|------------|------------------------------|----------------------------------------------------------------------------------------------------------------------------------------------------------------------------------------------------------------|
| 9 Khat chewing                  | EDHS 2016  | Latitude and longitude point | Total number of people chewing khat in the last one month prior to the survey divided by the total number of people participating in the survey                                                                |
| 12 Alcohol drinking             | EDHS 2016  | Latitude and longitude point | Total number of people drinking alcohol in the month prior to the survey divided by the total number of people participating in the survey                                                                     |
| 15 Cigarette smoking            | EPHI STEPS | Latitude and longitude point | Total number of people currently smoke cigarettes divided by the total number of people participating in the survey                                                                                            |
| 18 Cooking inside the household | EDHS 2016  | Latitude and longitude point | Total number of households where cooking takes place inside the house without a separate building or outdoors (i.e. exposure to smoke inside the home) divided by the total number of households in the survey |
| 23 Use solid fuel for cooking   | EDHS 2016  | Latitude and longitude point | Number of households used some type of solid fuel (wood, dung, grass, crop) for cooking food divided by all households in the survey                                                                           |

#### 20 Disease prevention knowledge indicators

|                                  |           |                              |                                                                                                                                                                            |
|----------------------------------|-----------|------------------------------|----------------------------------------------------------------------------------------------------------------------------------------------------------------------------|
| 27 Adult illiteracy rate         | EDHS 2016 | Latitude and longitude point | Total number of adults (aged 15 years and above) who had not attended school or who cannot read and write divided by the total number of adults participated in the survey |
| 31 Access to listen to the radio | EDHS 2016 | Latitude and longitude point | Total number of people who had not access to listen to the radio divided by total survey participants                                                                      |
| 34 Access to watch TV            | EDHS 2016 | Latitude and longitude point | Total number of people have no access to watch television divided by total survey participants                                                                             |
| 38 Mobile phone ownership        | EDHS 2016 | Latitude and longitude point | Total number of people have no access to mobile phone divide by the total number of survey participants                                                                    |
| 41 Knowledge toward HIV          | EDHS 2016 | Latitude and longitude point | Number of people with poor knowledge towards HIV divided by the total number of people participating in the survey                                                         |

#### 44 Hand hygiene indicators

|                                                   |           |                              |                                                                                                                               |
|---------------------------------------------------|-----------|------------------------------|-------------------------------------------------------------------------------------------------------------------------------|
| 45 Travel time to water sources                   | EDHS 2016 | Latitude and longitude point | Mean travel time in minutes to obtain water source (i.e. access to a water source)                                            |
| 48 Place for handwashing                          | EDHS 2016 | Latitude and longitude point | Number of households have no fixed or mobile place for handwashing divided by total number of households in the survey        |
| 52 Soap or detergent availability for handwashing | EDHS 2016 | Latitude and longitude point | Number of households have no essential handwashing agents (i.e. soap, and detergent) divided by total household in the survey |

#### 55 Comorbidities indicators

|        |            |                              |                                                                                    |
|--------|------------|------------------------------|------------------------------------------------------------------------------------|
| 56 HTN | EPHI STEPS | Latitude and longitude point | Total number of people with HTN divided by the total number of survey participants |
|--------|------------|------------------------------|------------------------------------------------------------------------------------|

59

60

1

2

3

4

5

6

7

8

9

10

11

12

13

14

15

16

17

18

19

20

21

22

23

24

25

26

27

28

29

30

31

32

33

34

35

36

37

38

39

40

41

42

43

44

45

46

47

48

49

50

51

52

53

54

55

56

57

58

59

60

|                                                                                                                                                                                                                                                                                                                                                                             |            |                              |                                                                                                                                                                                       |
|-----------------------------------------------------------------------------------------------------------------------------------------------------------------------------------------------------------------------------------------------------------------------------------------------------------------------------------------------------------------------------|------------|------------------------------|---------------------------------------------------------------------------------------------------------------------------------------------------------------------------------------|
| DM                                                                                                                                                                                                                                                                                                                                                                          | EPHI STEPS | Latitude and longitude point | Total number of people with DM divided by the total number of survey participants                                                                                                     |
| BMI                                                                                                                                                                                                                                                                                                                                                                         | EPHI STEPS | Latitude and longitude point | Mean body mass index                                                                                                                                                                  |
| CVD                                                                                                                                                                                                                                                                                                                                                                         | EPHI STEPS | Latitude and longitude point | Total number of people with heart disease divided by total number of people in the survey                                                                                             |
| Cholesterol                                                                                                                                                                                                                                                                                                                                                                 | EPHI STEPS | Latitude and longitude point | Mean cholesterol level                                                                                                                                                                |
| HIV prevalence                                                                                                                                                                                                                                                                                                                                                              | EDHS 2016  | Latitude and longitude point | Total number of people with HIV divided by survey participants                                                                                                                        |
| TB SMR                                                                                                                                                                                                                                                                                                                                                                      | EMOH       | District                     | Standardized morbidity ratio (SMR) as measured by observed number of TB cases divided by the expected number of TB cases                                                              |
| <b>Service availability and readiness indicators</b>                                                                                                                                                                                                                                                                                                                        |            |                              |                                                                                                                                                                                       |
| Health care access problem                                                                                                                                                                                                                                                                                                                                                  | EDHS 2016  | Latitude and longitude point | Difficulty of getting advice or treatment due to lack of money, or distance to a health facility                                                                                      |
| General service readiness and availability                                                                                                                                                                                                                                                                                                                                  | EPHI SARA  | Latitude and longitude point | Availability of equipment and supplies (i.e. basic amenities, equipment, standard precautions, diagnostic capacity, essential medicines) necessary to provide general health services |
| ICU availability                                                                                                                                                                                                                                                                                                                                                            | EPHI SARA  | Latitude and longitude point | Availability of Critical Care Services (ICU) in hospitals                                                                                                                             |
| CRD readiness index                                                                                                                                                                                                                                                                                                                                                         | EPHI SARA  | Latitude and longitude point | Availability of specific services for Chronic respiratory disease (CRD) diagnosis, management, and follow up                                                                          |
| TB readiness index                                                                                                                                                                                                                                                                                                                                                          | EPHI SARA  | Latitude and longitude point | Availability of specific services for tuberculosis diagnosis, management, and follow up                                                                                               |
| Diabetes readiness index                                                                                                                                                                                                                                                                                                                                                    | EPHI SARA  | Latitude and longitude point | Availability of specific service for diabetes diagnosis and management and follow up                                                                                                  |
| <i>G-Econ: Geographically based Economic data; EDHS: Ethiopia demographic and health survey; UN OCHA: United Nation Office for Coordination of Humanitarian Affairs; MAP: SRTM: Malaria Atlas Project; Shuttle Radar Topography Mission; EPHI: Ethiopia Public Health Institute; EMOH: Ethiopia Ministry of Health; SARA: Service Availability and Readiness Assessment</i> |            |                              |                                                                                                                                                                                       |

598

599

600

601

602

603

604

605

606

607

608

609

1  
2  
3 610  
4 611  
5 612  
6 613  
7 614  
8 615  
9 616  
10 617  
11 618  
12 619  
13 620  
14 621  
15 622  
16 623  
17 624  
18 625  
19 626  
20 627  
21 628  
22 629  
23 630  
24 631  
25 632

**Table 2: Evidence for risk of COVID-19 infection, severity, and death**

| Indicators                       | Risk factors | Evidence                                                                                                               | References                 |
|----------------------------------|--------------|------------------------------------------------------------------------------------------------------------------------|----------------------------|
| <b>Demographic indicators</b>    |              |                                                                                                                        |                            |
| Male sex                         | Severity     | Death from and severity of COVID-19 was strongly associated with being male (HR 1.99, 95%CI: 1.88-2.10)                | Williamson E <sup>40</sup> |
| Older age                        | Severity     | Older than 65 years were risk factors for disease progression in patients with COVID-19 (OR =6.06, 95% CI: 3.98, 9.22) | Zheng Z <sup>22</sup>      |
| <b>Socio-economic indicators</b> |              |                                                                                                                        |                            |
| Population density               | Infection    | High population density is a risk factor for COVID-19 infection                                                        | Ahmadi M <sup>41</sup>     |
| Number of household members      | Infection    | Areas with a higher percentage of households with more than one person per room had a higher incidence of COVID-19     | Ahmad K <sup>42</sup>      |
| Low wealth index                 | Infection    | Socio-economic deprivation (RR 1.26 per SD increase in Townsend Index) associated with COVID -19 infection             | Ho FK <sup>43</sup>        |
| <b>Connectivity indicators</b>   |              |                                                                                                                        |                            |
| Travel times to cities           | Infection    | The distance between Wuhan and other cities was inversely associated with the numbers of COVID-19 cases in that city   | Zheng R <sup>44</sup>      |
| Proximity to national borders    | Infection    | Cross country moment is a risk factor for COVID-19 transmission and importation                                        | Chinazz M <sup>45</sup>    |
| Distance to major roads          | Infection    | Spread of COVID-19 was correlated positively with public transportation per capita                                     | Ayene B <sup>16</sup> .    |
| <b>Climatic indicators</b>       |              |                                                                                                                        |                            |
| Mean temperature                 | Infection    | Low ambient temperatures are associated with more rapid spread of COVID-19                                             | Holtmann M <sup>46</sup>   |
| Mean precipitation               | Infection    | Countries with higher rainfall measurements showed an increase in COVID-19 transmission                                | Sobral MFF <sup>47</sup>   |
| Wind speed                       | Infection    | Areas with low values of wind speed associated with a high rate of COVID-19 infection                                  | Ahmadi M <sup>41</sup>     |
| Solar radiation                  | Infection    | Areas with low values of solar radiation exposure associated with a high rate of COVID-19 infection                    | Ahmadi M <sup>41</sup>     |

60

1  
2

|                                                      |                                                |           |                                                                                                                                    |                                           |
|------------------------------------------------------|------------------------------------------------|-----------|------------------------------------------------------------------------------------------------------------------------------------|-------------------------------------------|
| 3<br>4<br>5                                          | Water vapour pressure                          | Infection | High humidity reduces the transmission of COVID-19. Water vapour pressure negatively correctly with COVID-19 infection.            | Wang J <sup>48</sup> , Li J <sup>49</sup> |
| <b>Behavioural indicators</b>                        |                                                |           |                                                                                                                                    |                                           |
| 6<br>7                                               | Khat chewing                                   | Severity  | There is an association between khat chewing and chronic illness such as HIV infection, elevated diastolic blood pressure          | Basker GV <sup>50</sup>                   |
| 8                                                    | Alcohol drinking                               | Severity  | Patients with alcohol use disorders at increased risk for COVID-19                                                                 | Testino G <sup>21</sup>                   |
| 9<br>10<br>11                                        | Cigarette smoking                              | Severity  | Current smoking was a risk factor for disease progression in patients with COVID-19 (OR =2.51, 95% CI: 1.39, 3.32)                 | Zheng Z <sup>22</sup>                     |
| 12<br>13                                             | Cooking inside the household                   | Severity  | Areas with a higher percentage of incomplete kitchen facilities had a higher incidence of, and mortality associated with, COVID-19 | Ahmad K <sup>42</sup>                     |
| 14<br>15                                             | Use solid fuel for cooking                     | Severity  | Areas with a higher percentage of incomplete kitchen facilities had a higher incidence of, and mortality associated with, COVID-19 | Ahmad K <sup>42</sup>                     |
| <b>Disease prevention knowledge indicators</b>       |                                                |           |                                                                                                                                    |                                           |
| 16<br>17                                             | Adult illiteracy rate                          | Infection | Adult learning education is a tool to contain the COVID-19 pandemics                                                               | Lopes H <sup>51</sup>                     |
| 18<br>19                                             | Access to listen to radio                      | Infection | Access to media is a crucial factor in public health responses to an outbreak                                                      | Ayedee N <sup>52</sup>                    |
| 20<br>21                                             | Access to watch TV                             | Infection | Media (Television) has a significant role in creating a positive atmosphere in COVID-19                                            | Ayedee N <sup>52</sup>                    |
| 22<br>23                                             | Mobile phone ownership                         | Infection | Mobile phone calls and text messages help for the diagnosis, management, and control of infectious diseases                        | Wood S <sup>53</sup>                      |
| 24<br>25                                             | Knowledge towards HIV                          | Infection | Knowledge towards an infectious disease such as HIV can help to control the transmission of the diseases                           | Bertozzi S <sup>54</sup>                  |
| <b>Hand hygiene indicators</b>                       |                                                |           |                                                                                                                                    |                                           |
| 26<br>27                                             | Travel time to water sources                   | Infection | Adequate water supply is essential for the control of COVID-19 infection                                                           | WHO <sup>55</sup>                         |
| 28<br>29                                             | Place for handwashing                          | Infection | Hand washing is recommended by WHO for the control of COVID-19 infection                                                           | WHO <sup>56</sup>                         |
| 30<br>31                                             | Soap or detergent availability for handwashing | Infection | Availability of soap or detergent is essential to keep hand hygiene for the prevention of COVID-19 infection                       | WHO <sup>56</sup>                         |
| <b>Comorbidities indicators</b>                      |                                                |           |                                                                                                                                    |                                           |
| 32<br>33                                             | HTN                                            | Severity  | Hypertension was statistically significant with a higher rate of severity and death (OR = 2.72, 95% CI: 1.60,4.64)                 | Zheng Z <sup>22</sup>                     |
| 34<br>35                                             | DM                                             | Severity  | Death from COVID-19 was associated with DM (HR 1.50, 95%CI: 1.40-1.60) 1.50                                                        | Williamson E <sup>40</sup>                |
| 36<br>37                                             | BMI                                            | Severity  | Death from COVID-19 was associated with higher BMI (HR 1.27, 95%CI: 1.18-1.36)                                                     | Williamson E <sup>40</sup>                |
| 38<br>39                                             | CVD                                            | Severity  | Cardiovascular disease was significantly associated with higher COVID-19 severity and death (OR = 5.19, 95% CI: 3.25, 8.29)        | Zheng Z <sup>22</sup>                     |
| 40<br>41                                             | HIV prevalence                                 | Severity  | Mortality from COVID-19 was associated with immunosuppression (HR 1.69, 95%CI: 1.21-1.34)                                          | Williamson E <sup>40</sup>                |
| 42<br>43                                             | TB SMR                                         | Severity  | respiratory diseases were significantly associated with COVID-19 death and severity (OR = 5.15, 95% CI: 2.51, 10.57)               | Zheng Z <sup>22</sup>                     |
| <b>Service availability and readiness indicators</b> |                                                |           |                                                                                                                                    |                                           |
| 44<br>45                                             | Health care access problem                     | Death     | Healthcare resource availability is associated with COVID-19 mortality                                                             | Ji Y <sup>6</sup>                         |
| 46<br>47                                             | General service readiness                      | Death     | General health service preparedness is essential for combating the COVID-19 pandemic                                               | WHO <sup>57</sup>                         |
| 48<br>49                                             | ICU availability                               | Death     | Lack of critical care unite increase the risk of death from COVID-19                                                               | Murthy S <sup>58</sup>                    |
| 50<br>51                                             | CRD readiness                                  | Death     | Cardiorespiratory disease (CRD) is a risk factor for COVID-19 related death                                                        | Zheng Z <sup>22</sup>                     |
| 52<br>53                                             | TB readiness                                   | Death     | TB determinants outcomes of patients with COVID-19                                                                                 | Tadolini M <sup>59</sup>                  |
| 54<br>55                                             | Diabetes readiness                             | Death     | Diabetes affects the prognosis of patients with COVID-19                                                                           | Zheng Z <sup>22</sup>                     |



1  
2  
3  
4  
5  
6  
7  
8  
9  
10  
11  
12  
13  
14  
15  
16  
17  
18  
19  
20  
21  
22  
23  
24  
25  
26  
27  
28  
29  
30  
31  
32  
33  
34  
35  
36  
37  
38  
39  
40  
41  
42  
43  
44  
45  
46  
47  
48  
49  
50  
51  
52  
53  
54  
55  
56  
57  
58  
59  
60

*G-Econ: Geographically based Economic data; EDHS: Ethiopia demographic and health survey; UN OCHA: United Nation Office for Coordination of Humanitarian Affairs; MAP: SRTM: Malaria Atlas Project; Shuttle Radar Topography Mission; EPHI: Ethiopia Public Health Institute; EMOH: Ethiopia Ministry of Health; SARA: Service Availability and Readiness Assessment*

633

For peer review only

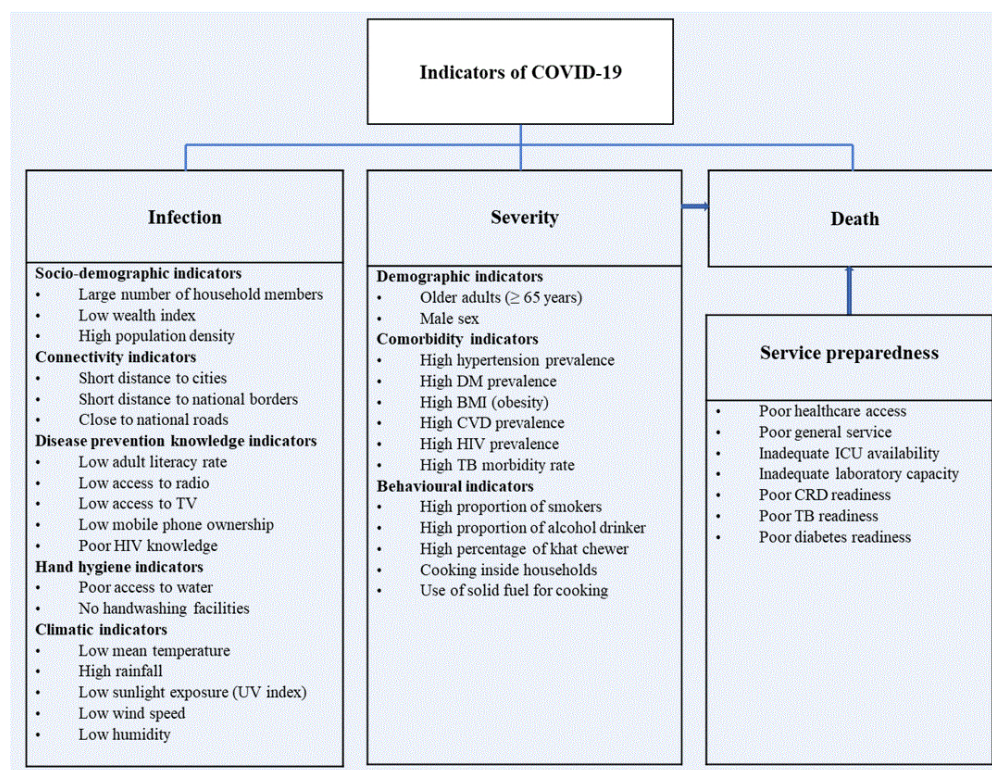

Figure 1: Indicators for the vulnerability of COVID-19 infection, severity, service, preparedness, and related death. DM: diabetes mellitus, BMI: body mass index, CVD: cardiovascular disease prevalence; TB: tuberculosis; HIV: Human immunodeficiency virus; ICU: intensive care unit; CRD: cardiorespiratory diseases

1  
2  
3  
4  
5  
6  
7  
8  
9  
10  
11  
12  
13  
14  
15  
16  
17  
18  
19  
20  
21  
22  
23  
24  
25  
26  
27  
28  
29  
30  
31  
32  
33  
34  
35  
36  
37  
38  
39  
40  
41  
42  
43  
44  
45  
46  
47  
48  
49  
50  
51  
52  
53  
54  
55  
56  
57  
58  
59  
60

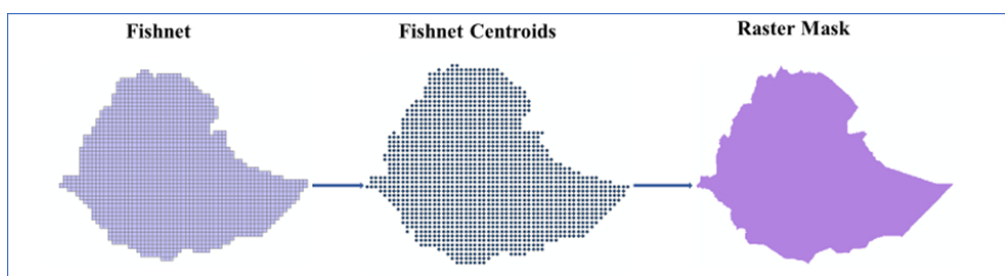

Figure 2: Rectangular polygon (fishnet), fishnet centroids, and raster mask covering the whole territory of Ethiopia.

165x44mm (150 x 150 DPI)

1  
2  
3  
4  
5  
6  
7  
8  
9  
10  
11  
12  
13  
14  
15  
16  
17  
18  
19  
20  
21  
22  
23  
24  
25  
26  
27  
28  
29  
30  
31  
32  
33  
34  
35  
36  
37  
38  
39  
40  
41  
42  
43  
44  
45  
46  
47  
48  
49  
50  
51  
52  
53  
54  
55  
56  
57  
58  
59  
60



Figure 3. Vulnerability map to COVID-19 infection in Ethiopia.

249x201mm (96 x 96 DPI)

1  
2  
3  
4  
5  
6  
7  
8  
9  
10  
11  
12  
13  
14  
15  
16  
17  
18  
19  
20  
21  
22  
23  
24  
25  
26  
27  
28  
29  
30  
31  
32  
33  
34  
35  
36  
37  
38  
39  
40  
41  
42  
43  
44  
45  
46  
47  
48  
49  
50  
51  
52  
53  
54  
55  
56  
57  
58  
59  
60

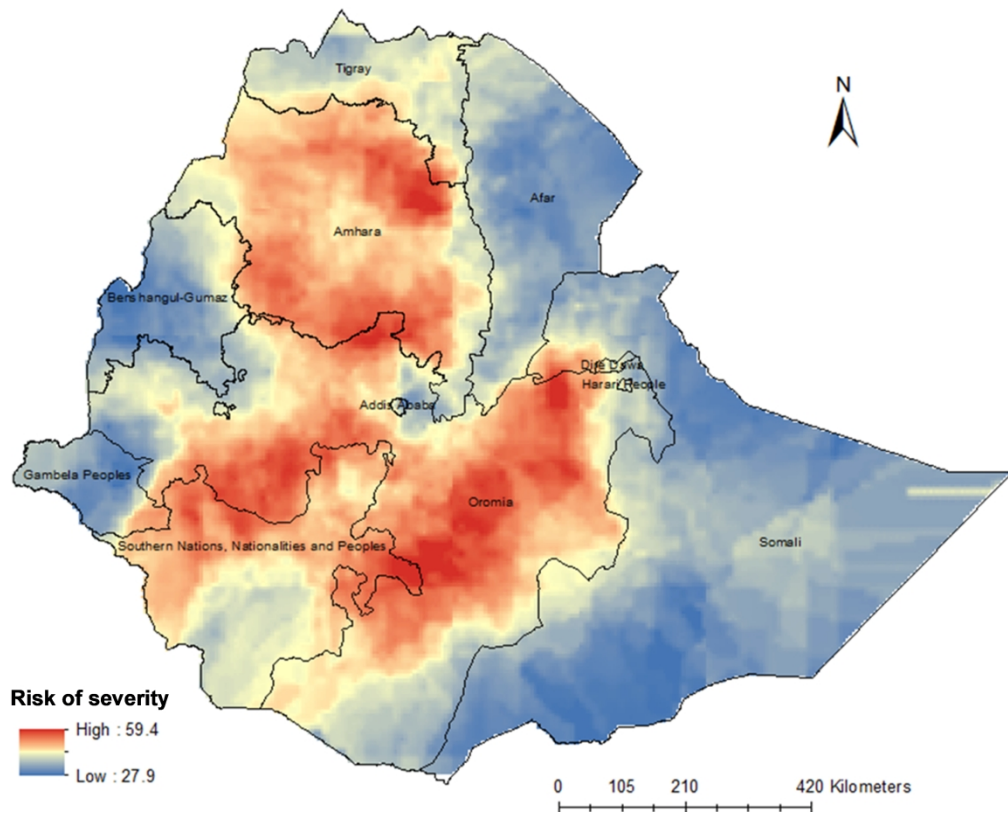

Figure 4. Vulnerability map to COVID-19 severity in Ethiopia.

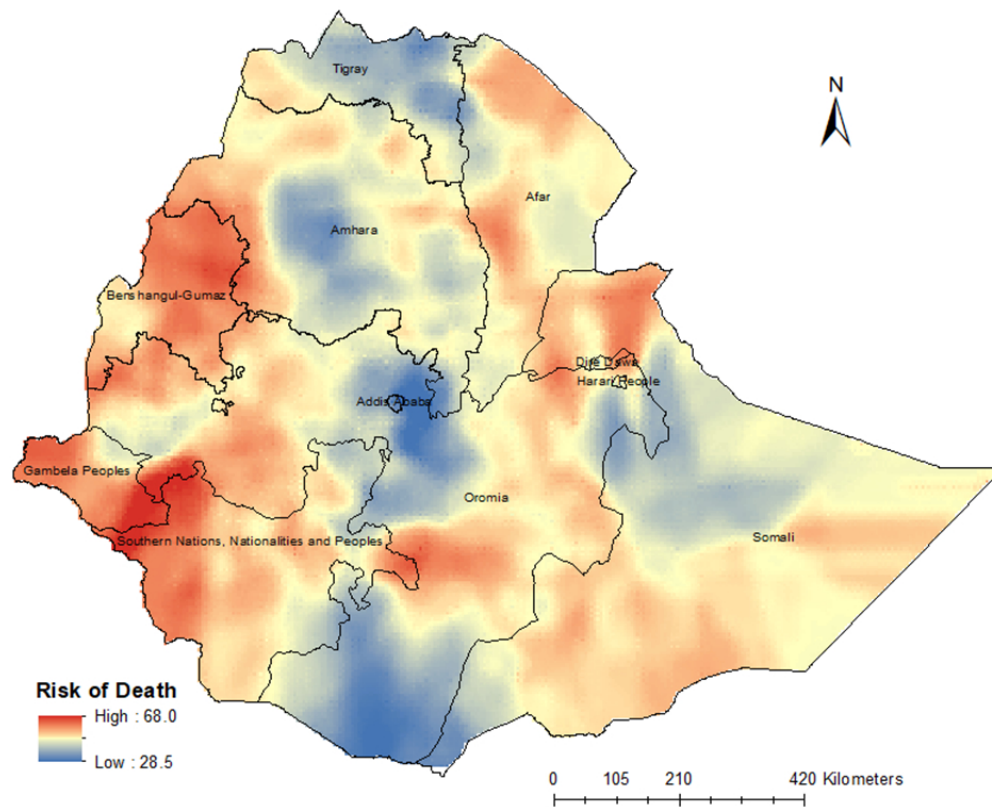

Figure 5. Vulnerability map to death from COVID-19 in Ethiopia.

248x200mm (96 x 96 DPI)

1  
2  
3  
4  
5  
6  
7  
8  
9  
10  
11  
12  
13  
14  
15  
16  
17  
18  
19  
20  
21  
22  
23  
24  
25  
26  
27  
28  
29  
30  
31  
32  
33  
34  
35  
36  
37  
38  
39  
40  
41  
42  
43  
44  
45  
46  
47  
48  
49  
50  
51  
52  
53  
54  
55  
56  
57  
58  
59  
60



Figure 6. Vulnerability map to service preparedness for COVID-19 in Ethiopia.

210x296mm (96 x 96 DPI)

## Supplemental Information

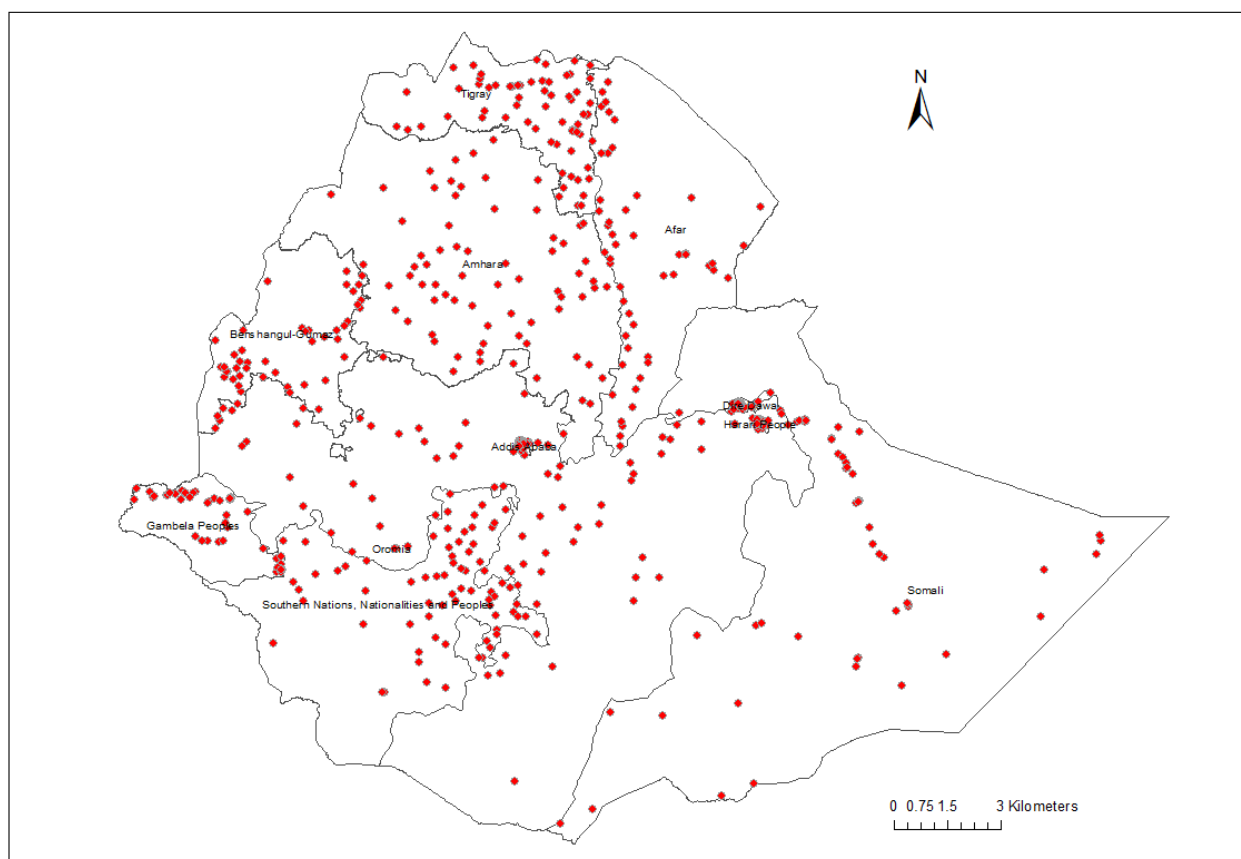

**Supplemental Figure 1:** A map showing the distribution of the Ethiopia Demographic and Health Survey (EDHS 2016) datapoints.



1  
2  
3  
4  
5  
6  
7  
8  
9  
10  
11  
12  
13  
14  
15  
16  
17  
18  
19  
20  
21  
22  
23  
24  
25  
26  
27  
28  
29  
30  
31  
32  
33  
34  
35  
36  
37  
38  
39  
40  
41  
42  
43  
44  
45  
46  
47  
48  
49  
50  
51  
52  
53  
54  
55  
56  
57  
58  
59  
60



S Figure 2a. COVID-19 infection risk map in Ethiopia, created based on a geometric mean



S Figure 2b. COVID-19 severity risk map in Ethiopia, created based on a geometric mean



S Figure 2c. Death risk map of COVID-19 in Ethiopia, created based on a geometric mean



S Figure 2d. Service preparedness map of COVID-19 in Ethiopia, created based on a geometric mean

**Supplemental Figure 2:** Vulnerability maps of COVID-19 infection, severity, preparedness, and death in Ethiopia, created based on a geometric mean as alternative aggregation method.

1  
2  
3  
4  
5  
6  
7  
8  
9  
10  
11  
12  
13  
14  
15  
16  
17  
18  
19  
20  
21  
22  
23  
24  
25  
26  
27  
28  
29  
30  
31  
32  
33  
34  
35  
36  
37  
38  
39  
40  
41  
42  
43  
44  
45  
46  
47  
48  
49  
50  
51  
52  
53  
54  
55  
56  
57  
58  
59  
60

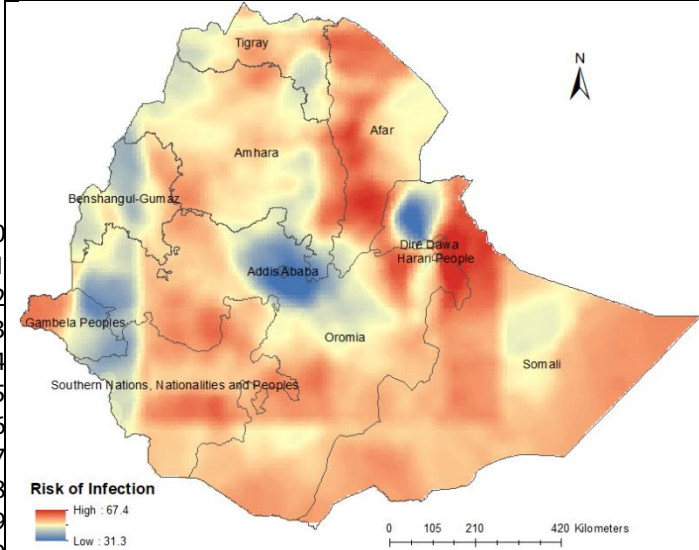

S Figure 3a. COVID-19 infection risk map in Ethiopia, created based on a geometric mean

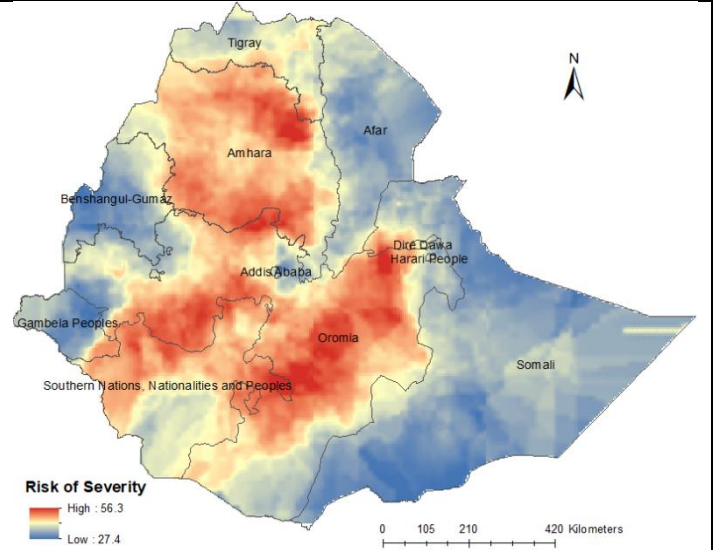

S Figure 3b. COVID-19 severity risk map in Ethiopia, created based on a geometric mean

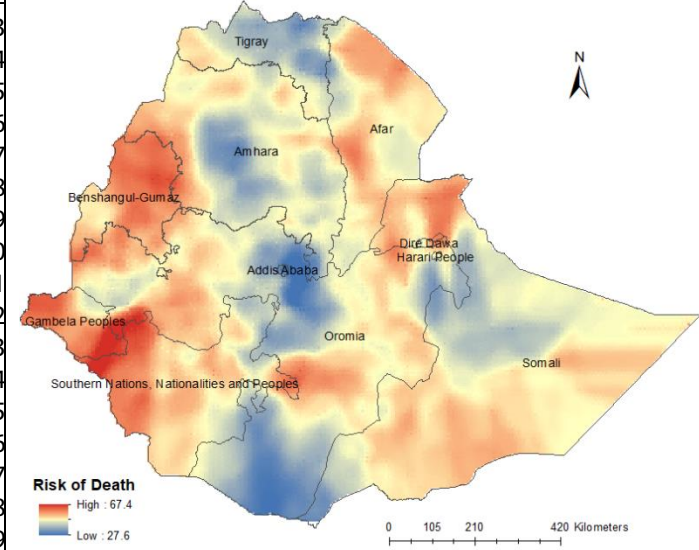

S Figure 3c. Death risk map of COVID-19 in Ethiopia, created based on a geometric mean

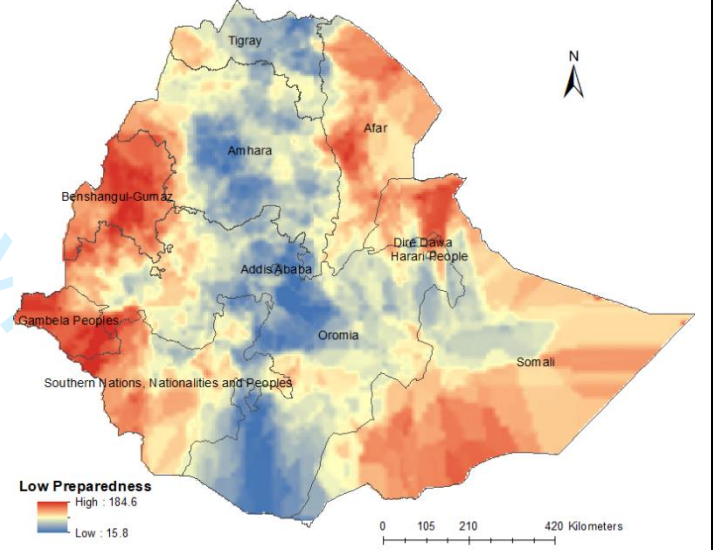

S Figure 3d. Service preparedness map of COVID-19 in Ethiopia, created based on a geometric mean

**Supplemental Figure 3:** Vulnerability maps of COVID-19 infection, severity, preparedness, and death in Ethiopia, created based on a principal component analysis (PCA) as alternative aggregation method.

1  
2  
3  
4  
5  
6  
7  
8  
9  
10  
11  
12  
13  
14  
15  
16  
17  
18  
19  
20  
21  
22  
23  
24  
25  
26  
27  
28  
29  
30  
31  
32  
33  
34  
35  
36  
37  
38  
39  
40  
41  
42  
43  
44  
45  
46  
47  
48  
49  
50  
51  
52  
53  
54  
55  
56  
57  
58  
59  
60



S Figure 4a. Average number of people living in a house



S Figure 4b. Percentage of population have no access to radio



S Figure 4b. Percentage of the population who have not access to mobile phone



S Figure 4d. Percentage of households who have not hand washing facilities

**Supplemental Figure 4: Selected indicators showing the risk of COVID-19 infection in Ethiopia**

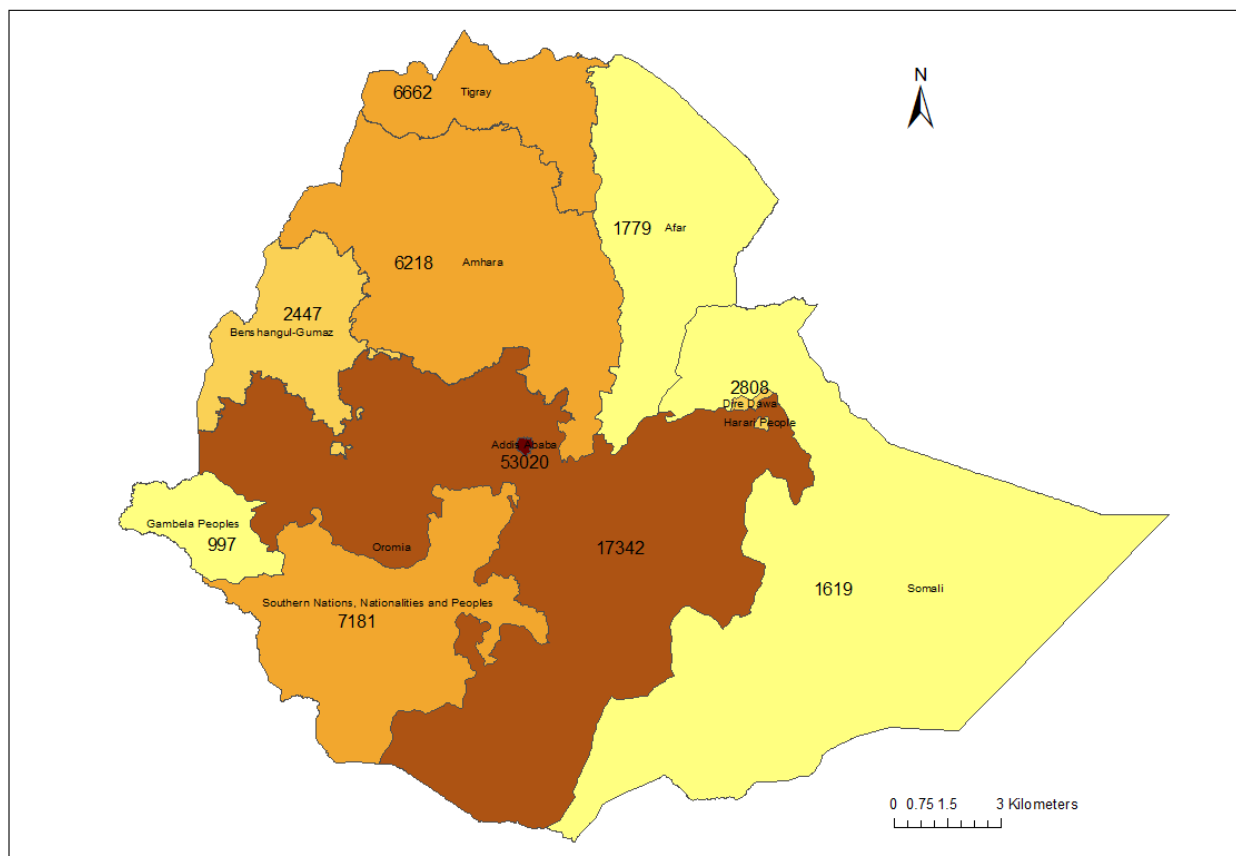

**Supplemental Figure 5:** Number of COVID-19 confirmed cases at regional level in Ethiopia on 15 November 2020.

**Supplemental Table 1: STROBE Statement—Checklist of items included in this study**

|                           | Item No | Recommendation                                                                                                                                                                                               | Page number       |
|---------------------------|---------|--------------------------------------------------------------------------------------------------------------------------------------------------------------------------------------------------------------|-------------------|
| <b>Title and abstract</b> | 1       | (a) Indicate the study's design with a commonly used term in the title or the abstract                                                                                                                       | 1                 |
|                           |         | (b) Provide in the abstract an informative and balanced summary of what was done and what was found                                                                                                          | 3                 |
| <b>Introduction</b>       |         |                                                                                                                                                                                                              |                   |
| Background/rationale      | 2       | Explain the scientific background and rationale for the investigation being reported                                                                                                                         | 5                 |
| Objectives                | 3       | State specific objectives, including any prespecified hypotheses                                                                                                                                             | 6                 |
| <b>Methods</b>            |         |                                                                                                                                                                                                              |                   |
| Study design              | 4       | Present key elements of study design early in the paper                                                                                                                                                      | 6                 |
| Setting                   | 5       | Describe the setting, locations, and relevant dates, including periods of recruitment, exposure, follow-up, and data collection                                                                              | 6                 |
| Participants              | 6       | (a) Give the eligibility criteria, and the sources and methods of selection of participants                                                                                                                  | 6, 7 & 8          |
| Variables                 | 7       | Clearly define all outcomes, exposures, predictors, potential confounders, and effect modifiers. Give diagnostic criteria, if applicable                                                                     | 6, 7 & 8          |
| Data sources/measurement  | 8       | For each variable of interest, give sources of data and details of methods of assessment (measurement). Describe comparability of assessment methods if there is more than one group                         | 6, 7, 8 & Table 1 |
| Bias                      | 9       | Describe any efforts to address potential sources of bias                                                                                                                                                    | 9                 |
| Study size                | 10      | Explain how the study size was arrived at                                                                                                                                                                    | NA                |
| Quantitative variables    | 11      | Explain how quantitative variables were handled in the analyses. If applicable, describe which groupings were chosen and why                                                                                 | 8 & 9             |
| Statistical methods       | 12      | (a) Describe all statistical methods, including those used to control for confounding                                                                                                                        | 8 & 9             |
|                           |         | (b) Describe any methods used to examine subgroups and interactions                                                                                                                                          | 8 & 9             |
|                           |         | (c) Explain how missing data were addressed                                                                                                                                                                  | 8 & 9             |
|                           |         | (d) If applicable, describe analytical methods taking account of sampling strategy                                                                                                                           | NA                |
|                           |         | (e) Describe any sensitivity analyses                                                                                                                                                                        | 9                 |
| <b>Results</b>            |         |                                                                                                                                                                                                              |                   |
| Participants              | 13      | (a) Report numbers of individuals at each stage of study—eg numbers potentially eligible, examined for eligibility, confirmed eligible, included in the study, completing follow-up, and analysed            | 9 & 10            |
|                           |         | (b) Give reasons for non-participation at each stage                                                                                                                                                         | 9 & 10            |
|                           |         | (c) Consider use of a flow diagram                                                                                                                                                                           | Figure 1          |
| Descriptive data          | 14      | (a) Give characteristics of study participants (eg demographic, clinical, social) and information on exposures and potential confounders                                                                     | Table 1           |
|                           |         | (b) Indicate number of participants with missing data for each variable of interest                                                                                                                          | NA                |
| Outcome data              | 15      | Report numbers of outcome events or summary measures                                                                                                                                                         | 9 & 10            |
| Main results              | 16      | (a) Give unadjusted estimates and, if applicable, confounder-adjusted estimates and their precision (eg, 95% confidence interval). Make clear which confounders were adjusted for and why they were included | NA                |
|                           |         | (b) Report category boundaries when continuous variables were categorized                                                                                                                                    | NA                |
|                           |         | (c) If relevant, consider translating estimates of relative risk into absolute risk for a meaningful time period                                                                                             | NA                |
| Other analyses            | 17      | Report other analyses done—eg analyses of subgroups and interactions, and sensitivity analyses                                                                                                               | 9                 |
| <b>Discussion</b>         |         |                                                                                                                                                                                                              |                   |
| Key results               | 18      | Summarise key results with reference to study objectives                                                                                                                                                     | 10                |
| Limitations               | 19      | Discuss limitations of the study, taking into account sources of potential bias or imprecision. Discuss both direction and magnitude of any potential bias                                                   | 13                |
| Interpretation            | 20      | Give a cautious overall interpretation of results considering objectives, limitations, multiplicity of analyses, results from similar studies, and other relevant evidence                                   | 10-13             |
| Generalisability          | 21      | Discuss the generalisability (external validity) of the study results                                                                                                                                        | 13                |
| <b>Other information</b>  |         |                                                                                                                                                                                                              |                   |
| Funding                   | 22      | Give the source of funding and the role of the funders for the present study and, if applicable, for the original study on which the present article is based                                                | 15                |
