# Supplementary material for: COVID-19 in Ethiopia: a geospatial analysis of vulnerability to infection, case severity and death
Source: HighWire-hosted journal article supplement (doi:10.1136/bmjopen-2020-044606), 2021-02-01
Supplement: bmjopen-2020-044606supp001_data_supplement.pdf [file bmjopen-2020-044606supp001_data_supplement.pdf]

## Supplemental Information

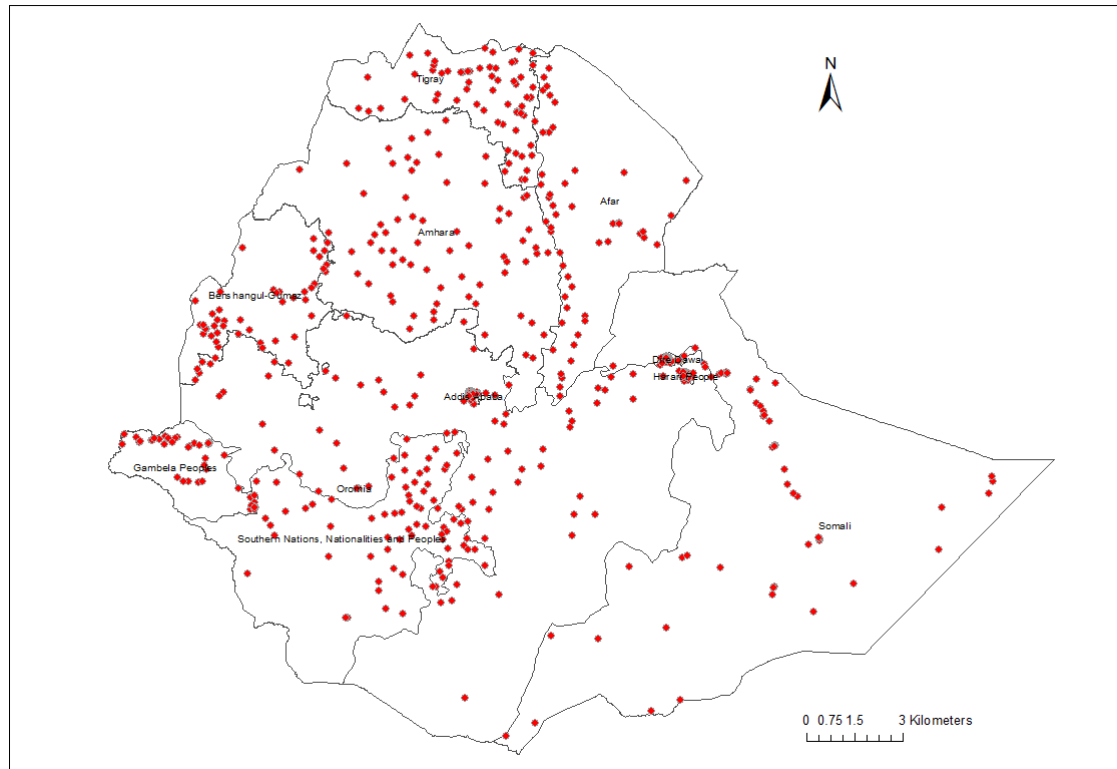

**Supplemental Figure 1:** A map showing the distribution of the Ethiopia Demographic and Health Survey (EDHS 2016) datapoints.

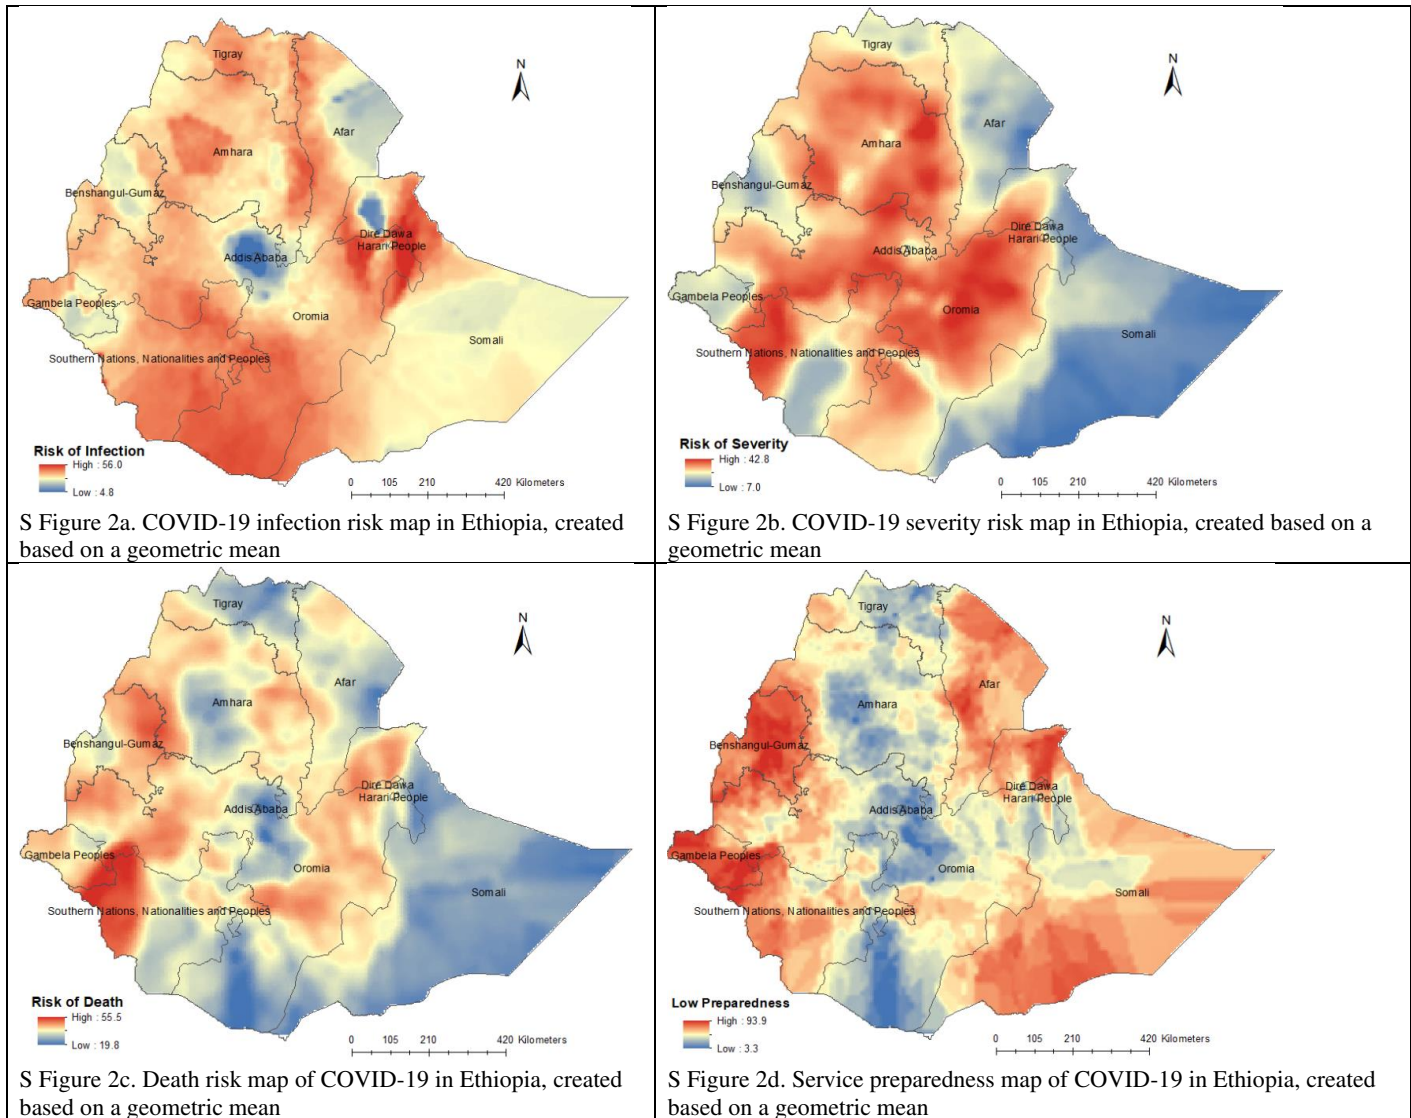

**Supplemental Figure 2:** Vulnerability maps of COVID-19 infection, severity, preparedness, and death in Ethiopia, created based on a geometric mean as alternative aggregation method.

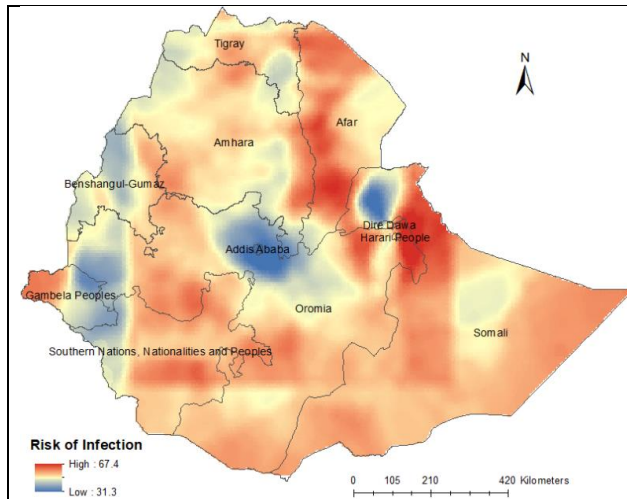

S Figure 3a. COVID-19 infection risk map in Ethiopia, created based on a geometric mean

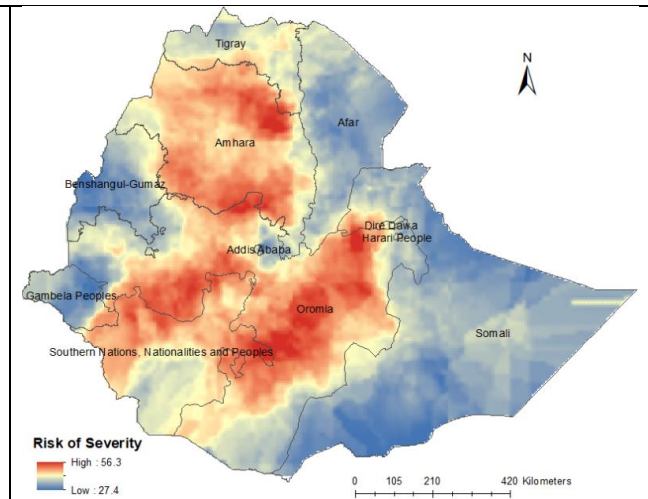

S Figure 3b. COVID-19 severity risk map in Ethiopia, created based on a geometric mean

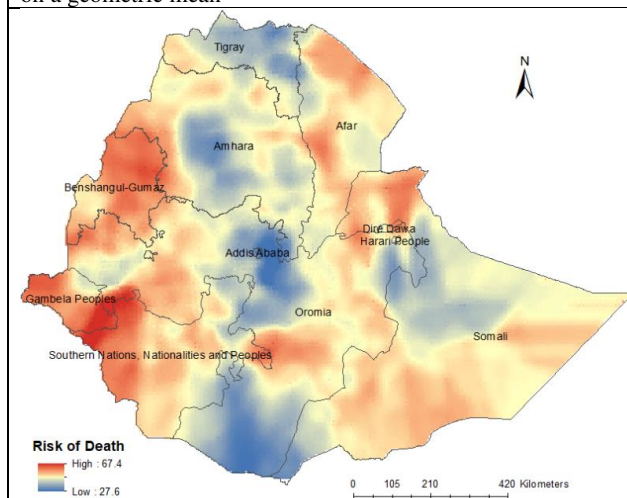

S Figure 3c. Death risk map of COVID-19 in Ethiopia, created based on a geometric mean

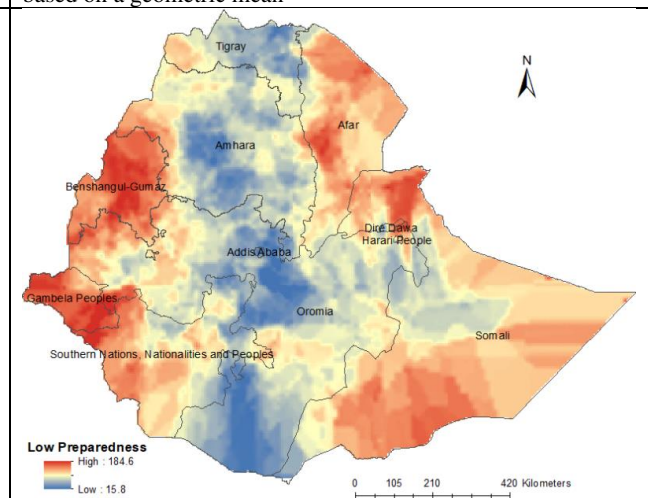

S Figure 3d. Service preparedness map of COVID-19 in Ethiopia, created based on a geometric mean

**Supplemental Figure 3:** Vulnerability maps of COVID-19 infection, severity, preparedness, and death in Ethiopia, created based on a principal component analysis (PCA) as alternative aggregation method.

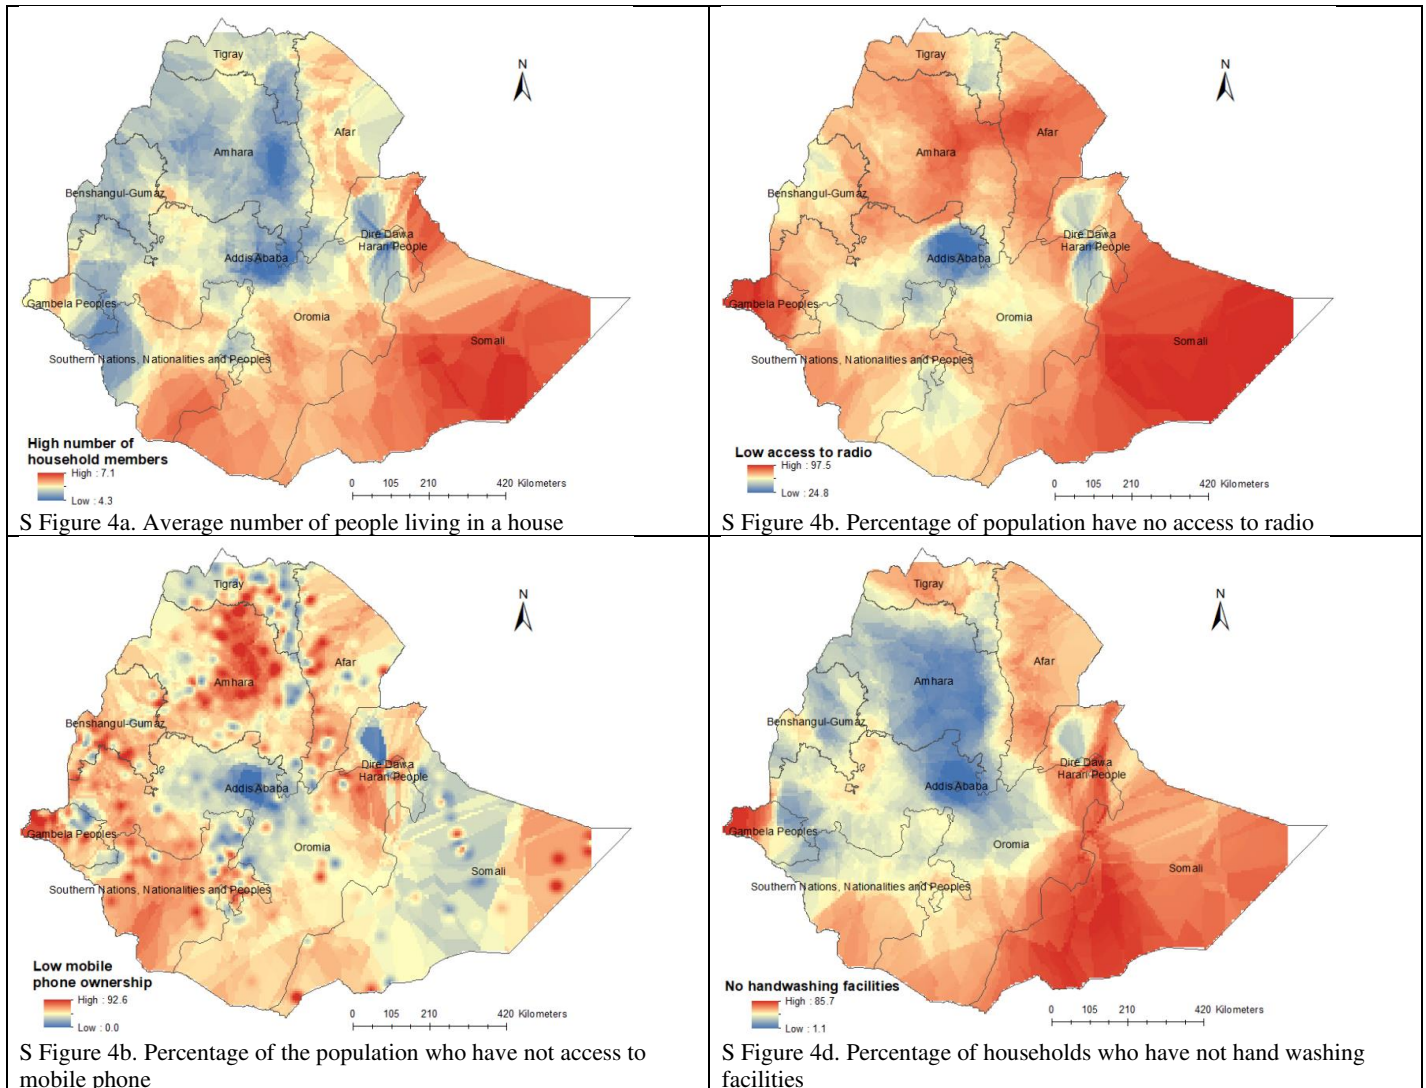

**Supplemental Figure 4:** Selected indicators showing the risk of COVID-19 infection in Ethiopia

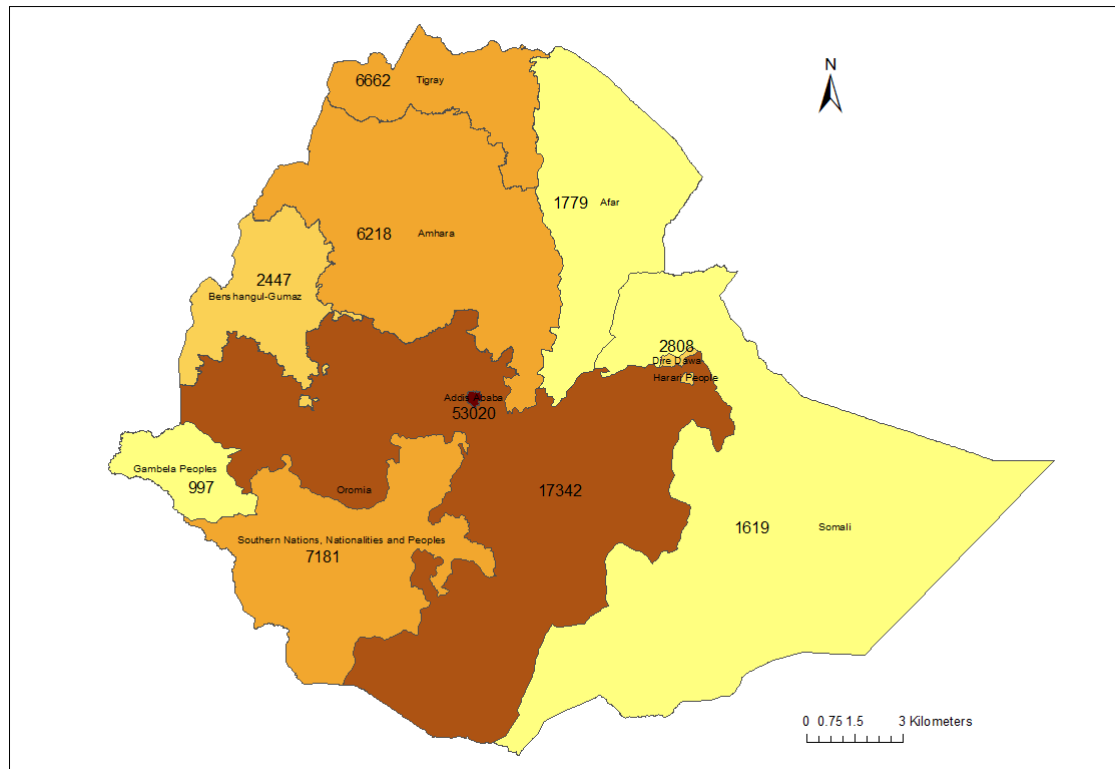

**Supplemental Figure 5:** Number of COVID-19 confirmed cases at regional level in Ethiopia on 15 November 2020.

**Supplemental Table 1: STROBE Statement—Checklist of items included in this study**

|                           | <b>Item No</b> | <b>Recommendation</b>                                                                                                                                                                                        | <b>Page number</b> |
|---------------------------|----------------|--------------------------------------------------------------------------------------------------------------------------------------------------------------------------------------------------------------|--------------------|
| <b>Title and abstract</b> | 1              | (a) Indicate the study's design with a commonly used term in the title or the abstract                                                                                                                       | 1                  |
|                           |                | (b) Provide in the abstract an informative and balanced summary of what was done and what was found                                                                                                          | 3                  |
| <b>Introduction</b>       |                |                                                                                                                                                                                                              |                    |
| Background/rationale      | 2              | Explain the scientific background and rationale for the investigation being reported                                                                                                                         | 5                  |
| Objectives                | 3              | State specific objectives, including any prespecified hypotheses                                                                                                                                             | 6                  |
| <b>Methods</b>            |                |                                                                                                                                                                                                              |                    |
| Study design              | 4              | Present key elements of study design early in the paper                                                                                                                                                      | 6                  |
| Setting                   | 5              | Describe the setting, locations, and relevant dates, including periods of recruitment, exposure, follow-up, and data collection                                                                              | 6                  |
| Participants              | 6              | (a) Give the eligibility criteria, and the sources and methods of selection of participants                                                                                                                  | 6, 7 & 8           |
| Variables                 | 7              | Clearly define all outcomes, exposures, predictors, potential confounders, and effect modifiers. Give diagnostic criteria, if applicable                                                                     | 6, 7 & 8           |
| Data sources/measurement  | 8              | For each variable of interest, give sources of data and details of methods of assessment (measurement). Describe comparability of assessment methods if there is more than one group                         | 6, 7, 8 & Table 1  |
| Bias                      | 9              | Describe any efforts to address potential sources of bias                                                                                                                                                    | 9                  |
| Study size                | 10             | Explain how the study size was arrived at                                                                                                                                                                    | NA                 |
| Quantitative variables    | 11             | Explain how quantitative variables were handled in the analyses. If applicable, describe which groupings were chosen and why                                                                                 | 8 & 9              |
| Statistical methods       | 12             | (a) Describe all statistical methods, including those used to control for confounding                                                                                                                        | 8 & 9              |
|                           |                | (b) Describe any methods used to examine subgroups and interactions                                                                                                                                          | 8 & 9              |
|                           |                | (c) Explain how missing data were addressed                                                                                                                                                                  | 8 & 9              |
|                           |                | (d) If applicable, describe analytical methods taking account of sampling strategy                                                                                                                           | NA                 |
|                           |                | (e) Describe any sensitivity analyses                                                                                                                                                                        | 9                  |
| <b>Results</b>            |                |                                                                                                                                                                                                              |                    |
| Participants              | 13             | (a) Report numbers of individuals at each stage of study—eg numbers potentially eligible, examined for eligibility, confirmed eligible, included in the study, completing follow-up, and analysed            | 9 & 10             |
|                           |                | (b) Give reasons for non-participation at each stage                                                                                                                                                         | 9 & 10             |
|                           |                | (c) Consider use of a flow diagram                                                                                                                                                                           | Figure 1           |
| Descriptive data          | 14             | (a) Give characteristics of study participants (eg demographic, clinical, social) and information on exposures and potential confounders                                                                     | Table 1            |
|                           |                | (b) Indicate number of participants with missing data for each variable of interest                                                                                                                          | NA                 |
| Outcome data              | 15             | Report numbers of outcome events or summary measures                                                                                                                                                         | 9 & 10             |
| Main results              | 16             | (a) Give unadjusted estimates and, if applicable, confounder-adjusted estimates and their precision (eg, 95% confidence interval). Make clear which confounders were adjusted for and why they were included | NA                 |
|                           |                | (b) Report category boundaries when continuous variables were categorized                                                                                                                                    | NA                 |
|                           |                | (c) If relevant, consider translating estimates of relative risk into absolute risk for a meaningful time period                                                                                             | NA                 |
| Other analyses            | 17             | Report other analyses done—eg analyses of subgroups and interactions, and sensitivity analyses                                                                                                               | 9                  |
| <b>Discussion</b>         |                |                                                                                                                                                                                                              |                    |
| Key results               | 18             | Summarise key results with reference to study objectives                                                                                                                                                     | 10                 |
| Limitations               | 19             | Discuss limitations of the study, taking into account sources of potential bias or imprecision. Discuss both direction and magnitude of any potential bias                                                   | 13                 |
| Interpretation            | 20             | Give a cautious overall interpretation of results considering objectives, limitations, multiplicity of analyses, results from similar studies, and other relevant evidence                                   | 10-13              |
| Generalisability          | 21             | Discuss the generalisability (external validity) of the study results                                                                                                                                        | 13                 |
| <b>Other information</b>  |                |                                                                                                                                                                                                              |                    |
| Funding                   | 22             | Give the source of funding and the role of the funders for the present study and, if applicable, for the original study on which the present article is based                                                | 15                 |
